# Supplementary material for: Systematic review of prognostic prediction models for acute kidney injury (AKI) in general hospital populations
Source: PubMed Central journal article supplement — BMJ Open. 2017 Sep 27;7(9):e016591. doi: 10.1136/bmjopen-2017-016591 (PMC5623486; doi:10.1136/bmjopen-2017-016591), 2017-09-27
Supplement: bmjopen-2017-016591.draft_revisions.pdf [file bmjopen-2017-016591.draft_revisions.pdf]

# BMJ Open

BMJ Open is committed to open peer review. As part of this commitment we make the peer review history of every article we publish publicly available.

When an article is published we post the peer reviewers' comments and the authors' responses online. We also post the versions of the paper that were used during peer review. These are the versions that the peer review comments apply to.

The versions of the paper that follow are the versions that were submitted during the peer review process. They are not the versions of record or the final published versions. They should not be cited or distributed as the published version of this manuscript.

BMJ Open is an open access journal and the full, final, typeset and author-corrected version of record of the manuscript is available on our site with no access controls, subscription charges or pay-per-view fees (<http://bmjopen.bmj.com>).

If you have any questions on BMJ Open's open peer review process please email [info.bmjopen@bmj.com](mailto:info.bmjopen@bmj.com)

# BMJ Open

## A systematic review of prognostic prediction models for acute kidney injury (AKI) in general hospital populations.

|                                 |                                                                                                                                                                                                                                                                                                                                                                                                                                                                                                                                                          |
|---------------------------------|----------------------------------------------------------------------------------------------------------------------------------------------------------------------------------------------------------------------------------------------------------------------------------------------------------------------------------------------------------------------------------------------------------------------------------------------------------------------------------------------------------------------------------------------------------|
| Journal:                        | <i>BMJ Open</i>                                                                                                                                                                                                                                                                                                                                                                                                                                                                                                                                          |
| Manuscript ID                   | bmjopen-2017-016591                                                                                                                                                                                                                                                                                                                                                                                                                                                                                                                                      |
| Article Type:                   | Research                                                                                                                                                                                                                                                                                                                                                                                                                                                                                                                                                 |
| Date Submitted by the Author:   | 23-Feb-2017                                                                                                                                                                                                                                                                                                                                                                                                                                                                                                                                              |
| Complete List of Authors:       | Hodgson, Luke; University of Southampton, Faculty of Medicine; Western Sussex Hospitals NHS Trust, Intensive Care<br>Sarnowski, Alexander; Royal Surrey County Hospital NHS Foundation Trust<br>Roderick, Paul; University of Southampton, Faculty of Medicine<br>Dimitrov, Borislav; University of Southampton, Primary Care and Population Sciences<br>Venn, Richard; Western Sussex Hospitals NHS Trust, Intensive Care<br>Forni, Lui; University of Surrey Faculty of Health and Medical Sciences; Royal Surrey County Hospital NHS Foundation Trust |
| <b>Primary Subject Heading</b>: | Renal medicine                                                                                                                                                                                                                                                                                                                                                                                                                                                                                                                                           |
| Secondary Subject Heading:      | Research methods                                                                                                                                                                                                                                                                                                                                                                                                                                                                                                                                         |
| Keywords:                       | Nephrology < INTERNAL MEDICINE, Acute renal failure < NEPHROLOGY, STATISTICS & RESEARCH METHODS                                                                                                                                                                                                                                                                                                                                                                                                                                                          |
|                                 |                                                                                                                                                                                                                                                                                                                                                                                                                                                                                                                                                          |

SCHOLARONE™  
Manuscripts

Only

## Title Page

### Title: A systematic review of prognostic prediction models for acute kidney injury (AKI) in general hospital populations.

**Corresponding author:** Dr Luke E Hodgson, Academic Unit of Primary Care and Population Sciences, Faculty of Medicine, University of Southampton, Southampton General Hospital, Tremona Road, Southampton, SO16 6YD.

Email: [drhodgson@gmail.com](mailto:drhodgson@gmail.com) Telephone: +44 7734883040

#### Authors:

Luke E Hodgson,<sup>1,2</sup> Intensive Care Registrar,

Alexander Sarnowski<sup>3</sup>, Core Medical Trainee,

Paul J Roderick<sup>1</sup>, Professor of Public Health,

Borislav D Dimitrov<sup>1</sup>, Associate Professor Medical Statistics<sup>†</sup>,

Richard M Venn<sup>2</sup>, Consultant Intensivist and,

Lui G Forni<sup>3,4</sup>, Professor of Intensive Care Medicine.

1. Academic Unit of Primary Care and Population Sciences, Faculty of Medicine, University of Southampton, Southampton General Hospital, Tremona Road, Southampton, SO16 6YD, UK.
2. Western Sussex Hospitals NHS Foundation Trust, Anaesthetics Department, Worthing Hospital, Lyndhurst Rd, Worthing, BN11 2DH, UK.
3. The Royal Surrey County Hospital NHS Foundation Trust, Egerton Road, Guildford, GU2 7XX, UK.
4. Faculty of Health and Medical Sciences, University of Surrey, Guildford, Surrey, GU2 7XH, UK.

<sup>†</sup> Deceased 15<sup>th</sup> January 2017.

**Word count main text: 2715**

## Abstract

**Objective** Critically appraise prediction models for hospital-acquired AKI (HA-AKI) in general populations.

**Design** Systematic review.

**Data sources** Medline, EMBASE & Web of Science until November 2016.

**Eligibility for study selection** Studies describing development of a multivariable model for predicting HA-AKI in non-specialised adult hospital populations. Published guidance for systematic reviews and reporting followed for data extraction and appraisal.

**Results** 14046 references were screened. Of 53 HA-AKI prediction models, 11 met inclusion criteria (general medicine and/or surgery populations, 474478 patient episodes), five with external validation. The most common predictors were chronic kidney disease (n=10 models), age (n=9), diabetes (n=5), drugs (diuretics n=4 and/or Angiotensin-converting enzyme inhibitors/Angiotensin-receptor blockers n=3), serum bicarbonate and heart failure (4 models each). Substantial heterogeneity was identified between studies for outcome definition (timing and marker). Deficiencies in recommended reporting included handling of candidate predictors and missing data, blinding of outcome assessment and sample size considerations. Area under the receiver operating characteristic curves to predict HA-AKI ranged 0.71-0.80 in derivation (reported in 8/11 studies), 0.66-0.80 for internal validation studies (n=7) and 0.65-0.71 in 5 external validations. For calibration the Hosmer-Lemeshow test or a calibration plot were provided in only 4/11 derivations, 3/11 internal and 3/5 external

1  
2  
3 validations. A minority of the models allow easy bedside calculation and  
4  
5 potential electronic automation. No impact analysis studies were found.  
6

7 **Conclusions** AKI prediction models may help address shortcomings in risk  
8  
9 assessment, however, in general hospital populations few have external  
10  
11 validation. Similar candidate predictors reflect an elderly demographic with  
12  
13 chronic co-morbidities. Reporting deficiencies mirror prediction research more  
14  
15 broadly. Future research should focus on validation, impact analysis and  
16  
17 potential electronic linkage between primary and secondary care. An impact  
18  
19 analysis could combine a prediction model with AKI alerting to address  
20  
21 prevention and early recognition of evolving AKI.  
22  
23  
24  
25  
26  
27

28 **Key words: acute kidney injury, clinical prediction models, systematic**  
29 **review**  
30  
31  
32  
33  
34  
35  
36  
37  
38  
39  
40  
41  
42  
43  
44  
45  
46  
47  
48  
49  
50  
51  
52  
53  
54  
55  
56  
57  
58  
59  
60

## Summary

### Strengths

- This is the first systematic review of prediction models for hospital-acquired AKI (HA-AKI) in general hospital populations who account for the majority of hospital admissions and AKI cases.
- The models were selected following an extensive literature search and critical appraisal guidance.
- The large number of patient episodes provides important insights into AKI prediction and complements other recent reviews in specialised areas (cardiac surgery, CI-AKI and liver transplantation).

### Weaknesses

- Lack of access to individual participant data (IPD) prevented a meta-analysis of the studies, an avenue of future research.
- The small number of externally validated models and absence of impact analysis limits recommendation of an individual model.

## Introduction

Acute kidney injury (AKI) is defined as an acute increase in serum creatinine (SCr) or reduction in urine volume.[1] The incidence of AKI is increasing, affecting up to one in five hospitalised adults worldwide.[2] A continuum of injury exists long before sufficient loss of excretory kidney function can be measured with standard laboratory tests (i.e. SCr).[3 4] Associated mortality remains high, in part reflecting the severity of the underlying disease, but may also be due to the limitations of conventional markers to detect early injury.[5]

Deficits in recognition and management of patients with AKI,[6] has led to practice guidance calling for improved risk assessment, at which point interventions could be most beneficial.[7] One suggested strategy to achieve this aim is through the implementation of clinical prediction models.[8 9] Though development and validation of AKI prediction models is desirable,[7 10] clinical application in this and other fields has been hampered for a number of reasons:

- Potential predictors and models continuously increase with new studies often finding conflicting results,[11]
- Substandard reporting of methodology and results make conclusions problematic,[12 13]
- Few general hospital population studies exist - specialist fields (cardiac and transplant surgery and contrast-induced [CI-AKI]) account for the majority of AKI models and all systematic reviews, but are unlikely to be generalisable and,[14-17]
- Models rarely enable electronic automation as part of clinical workflow, known to influence uptake.[18]

1  
2  
3  
4  
5 High quality systematic reviews of prediction models have been called for.[19]  
6  
7 Following recent reporting guidance (CHARMS[20] and TRIPOD),[12] this  
8  
9 review appraises hospital-acquired AKI (HA-AKI) prediction models in general  
10  
11 populations, who in the UK account for the majority of hospital episodes,[21]  
12  
13 and AKI cases.[22 23]  
14  
15  
16  
17  
18  
19  
20  
21  
22  
23  
24  
25  
26  
27  
28  
29  
30  
31  
32  
33  
34  
35  
36  
37  
38  
39  
40  
41  
42  
43  
44  
45  
46  
47  
48  
49  
50  
51  
52  
53  
54  
55  
56  
57  
58  
59  
60



## Methods

Published guidance helped frame the review question, data extraction, reporting and appraisal.[12 20] The research question was: what are the available prognostic prediction models for the development of HA-AKI in adult general populations? Using explicit, systematic methods to minimise bias and provide reliable findings from which conclusions can be drawn and decisions made,[24 25] the review aimed to collate empirical evidence for AKI prediction models across general hospital settings, fitting pre-specified eligibility criteria (online supplementary file eTable 1). Performance was assessed by discrimination and calibration including validation studies. The presence of any impact analysis studies was also investigated. The review aimed to provide recommendations for the most robust, usable models, including the ability to incorporate future electronic data linkage, for example between the community (primary care) and hospital.

### Data sources, study selection and data extraction

We searched MEDLINE, Embase & Web of Science databases (inception to November 2016) using recommended filters (online supplementary file eTables 2-4).[26 27] Titles and abstracts were screened by two reviewers (LH, AS) and full articles reviewed if eligible. Disagreements were resolved by iterative screening rounds. Reference lists from retrieved articles, systematic reviews, National[7] and International guidance[1] and our own literature files were also analysed. Data extraction, and quality assessment was performed by two investigators (LH, AS) with disagreements resolved by a third reviewer (LF). A data extraction form was used based on previous reviews and

1  
2  
3 guidance (summary online supplementary file eTable 5).[12 13 20] Items  
4  
5 extracted included design (eg, cohort, case-control), population, location,  
6  
7 outcome (definition duration of follow-up, blinding of assessment), modelling  
8  
9 method (eg, logistic), method of internal validation (eg, bootstrapping),  
10  
11 number of participants and events, number and type of predictors, model  
12  
13 presentation, and predictive performance (calibration, discrimination). Finally,  
14  
15 the presence of external validation was recorded. As no tool is currently  
16  
17 available in the field, a formal risk of bias assessment was not explicitly  
18  
19 performed.  
20  
21  
22  
23  
24

### 25 **Outcome, model performance and clinical utility**

26 It was anticipated that study outcome, HA-AKI, would vary given the  
27  
28 numerous definitions in use prior to KDIGO in 2012.[1] Discrimination and  
29  
30 calibration are the most common methods to assess model performance.  
31  
32 Discrimination is usually assessed graphically by the area under the receiver  
33  
34 operating characteristic curve (AUROC), representing how well a model  
35  
36 separates and ranks patients who experienced the outcome, from those who  
37  
38 did not. For prediction models, the AUROC, which focuses solely on accuracy  
39  
40 has a number of shortcomings, such as a lack of information on  
41  
42 consequences and when used in populations where the outcome prevalence  
43  
44 is rare.[28 29] Calibration describes how well predicted results agree with  
45  
46 observed results.[12 29] The Hosmer-Lemeshow (H-L) test, despite  
47  
48 limitations, is the most commonly used calibration statistic.[30 31] It is also  
49  
50 recommended to graphically plot expected and actual outcomes, for example,  
51  
52 with a calibration slope.[12] In addition to performance, ease of bedside use  
53  
54 and whether the models could be electronically automated - factors known to  
55  
56  
57  
58  
59  
60

1  
2  
3 influence successful uptake - were recorded.[18] A quantitative synthesis of  
4  
5 the models was not performed, being beyond the scope of review and formal  
6  
7 methods for meta-analysis of prediction models are yet to be fully developed.  
8  
9

### 10 11 **Reporting quality assessment**

12  
13  
14 A global TRIPOD score for each study was calculated to gauge  
15  
16 methodological reporting quality, consisting of the sum of the scores for each  
17  
18 individual item (out of a maximum 37, with a score of 1 for criterion met, score  
19  
20 of 0 for each item not met, or unclear).[12] As yet there has been no  
21  
22 suggested cut-off for what represents a high quality study, though it would be  
23  
24 reasonable to judge that those studies with the most significant gaps in  
25  
26 reporting are those at higher risk of bias.  
27  
28  
29  
30  
31

### 32 **Patient involvement**

33  
34 Patients were not involved in setting the research question, outcome, design  
35  
36 and implementation of the study. There are no plans to involve patients in  
37  
38 dissemination.  
39  
40  
41  
42  
43  
44  
45  
46  
47  
48  
49  
50  
51  
52  
53  
54  
55  
56  
57  
58  
59  
60

## Results

From 14046 articles identified by the search strategy, 254 full articles were reviewed (PRISMA flow chart, figure 1). Specialised fields (predominantly cardiac surgery, transplantation or CI-AKI) accounted for 61 of 74 (82%) of all studies. This review included eleven general model studies (n=474478 patient episodes), in General Surgery,[32 33] Trauma and Orthopaedics (T&O),[34] General Hospital cohorts (predominantly Medicine and Surgery),[35-39] and Heart Failure (summarised in table 1 and online supplementary file eTable 6).[40-42] Two further studies were purely external validations.[43 44] HA-AKI incidence was 7% (21641 events), though this varied from <1% in the General Surgery models,[32 33] to 28% across the Heart Failure studies and heterogeneous definitions (timeframe and marker) were employed. Mortality was significantly higher in those who developed the outcome in the six studies where data was available (ranging 6-42%). No impact analyses were retrieved.

## Study reporting

A median 28 (interquartile range 25-30) of 37 recommended items were reported, suggesting significant shortcomings, increasing the risk of bias (reporting summarised in online supplementary file eTable 8). By design, eight studies were retrospective, two were prospective and one was a case control. Five studies were single-centre. The USA (n=6) and UK (n=3) accounted for the majority of the models. Two studies used imputation techniques for missing data. Definitions were heterogeneous (table 1) with five using RIFLE,[36] AKIN,[41] or KDIGO criteria for changes in SCr.[34 35 38] One

1  
2  
3 study used KDIGO SCr change within a 24-hour timeframe of predictors being  
4  
5 measured.[39]  
6  
7  
8

### 9 10 **Candidate predictors, model building and sample size**

11 A median of 29 (interquartile range 19-35) predictors were considered, though  
12 frequently studies only reported those significant on univariate or multivariate  
13 analysis. Blinding of assessment of predictors and study outcome was not  
14 mentioned. Continuous predictors were dichotomized in two studies and ten  
15 studies used univariate analysis to select for multivariate analysis. No models  
16 mentioned shrinkage techniques or sample size calculations. Median number  
17 of outcome events was 271 (121-672). For statistical power, all of the studies  
18 had more than ten events per variable (EPV) included in the model. However  
19 the EPV was <10 in six studies, when accounting for the total number of  
20 candidate predictors assessed.[32 35 37 38 40 42] Of a total of 56 different  
21 predictors a median of 7 (7-12) were included per model, including  
22 demographics, past history, procedure information, laboratory parameters,  
23 observations and hospital admission diagnoses (most common presented in  
24 figure 2, full details online eTables 9-10).  
25  
26  
27  
28  
29  
30  
31  
32  
33  
34  
35  
36  
37  
38  
39  
40  
41  
42  
43  
44

### 45 **Model performance (table 1)**

46 Median AUROC (or C-Statistic) was 0.74 (range 0.67-0.80) for derivation and  
47 0.75 (range 0.66-0.80) for internal validations reporting discrimination (seven  
48 studies). Only one model study presented a calibration plot for derivation and  
49 validation.[34] The H-L statistic was used in three derivations,[35 36 41] and  
50 two internal validations.[38 41] Five models have been externally validated on  
51  
52  
53  
54  
55  
56  
57  
58  
59  
60

1  
2  
3 separate populations within the same study,[34 38] other model studies,[42]  
4  
5 or stand alone external validations,[32 44] with moderate AUROCs ranging  
6  
7 0.65-0.71. One validation provided a calibration plot,[34] one the H-L  
8  
9 statistic,[38] and one reported both.[44] In the Bell external validation cohort  
10  
11 calibration suggested the model over-predicted the outcome requiring  
12  
13 recalibration.[34] In the external validation of the Forni study calibration plots  
14  
15 showed agreement at low probability rates whilst at higher rates calibration  
16  
17 deviated in the medical cohort.[44] Two of the three surgical models have  
18  
19 been externally validated: the Kheterpal model,[32] in a Chinese population  
20  
21 (AUROC 0.66),[43] and the UK T&O study used a third centre for external  
22  
23 validation.[34] Two of five mixed general population models have external  
24  
25 validation,[35 38] the later having been derived on medical patients and  
26  
27 externally validated in medical and surgical cohorts.[44] The first of the three  
28  
29 heart failure studies was externally validated in the subsequent studies with  
30  
31 inferior discrimination (AUROC 0.65 in both validations).[40-42] No model  
32  
33 updating was reported.  
34  
35  
36  
37  
38  
39  
40  
41  
42  
43  
44  
45  
46  
47  
48  
49  
50  
51  
52  
53  
54  
55  
56  
57  
58  
59  
60

## Discussion

### Principal findings

In this first systematic review of HA-AKI prediction in general hospital settings, the most common predictors were age, CKD, diabetes, drugs, heart failure and serum bicarbonate. Modest discrimination performance is unsurprising when attempting at a single time point to predict a future event reflecting diverse aetiologies, affecting heterogeneous patient groups. Significant shortcomings mirror those described elsewhere:[13 45-47]

- Multiple similar models, rarely externally validated,
- No impact analysis or evidence of clinical implementation,
- Incomplete reporting and,
- Little consideration of electronic automation (allowing presentation without additional data input beyond usual clinical care), which influences uptake.[18]

Methodological and reporting shortcomings in the studies are summarised in table 2. Published after TRIPOD, Bell and colleagues' model provides researchers with a good template for adherence to guidance and demonstrates the utility of data linkage (for example between community and hospital), though lack of validation in other populations tempers recommendation for implementation.[34]

### Strengths and limitations of this review

This review summarises the currently available AKI prediction models in

1  
2  
3 general populations who account for the majority of hospital admissions and  
4 AKI cases.[21-23] The models were selected following an extensive literature  
5 search and critical appraisal guidance.[12 20] The large number of patient  
6 episodes provides important insights into AKI prediction complementing other  
7 recent reviews in cardiac surgery, CI-AKI, liver transplantation and non-  
8 cardiac surgery.[14-17] In-patient mortality in those who developed the  
9 outcome ranged 6-42% (in the six studies reporting mortality) emphasising  
10 this is a crucial group to promptly identify.  
11  
12  
13  
14  
15  
16  
17  
18  
19  
20

21  
22  
23  
24  
25 The first limitation is the small number of externally validated models, which  
26 tempers recommending one model over another. Secondly, though we aimed  
27 to include general populations, caution should be employed, for example,  
28 when comparing a model derived on Heart Failure patients to one from an  
29 Orthopaedic cohort. However, in many UK hospitals, such populations share  
30 similarities (predominantly elderly demographic with co-morbidities) and if one  
31 aim of a prediction model is generalizability, a model should be tested in these  
32 different fields. Thirdly, as study outcome definitions were heterogenous,  
33 model comparisons are problematic, though recent studies were more likely to  
34 use KDIGO SCr change. Fourthly, no studies included urine output, probably  
35 reflecting the small number of patients who have this marker closely  
36 monitored. Fifthly, TRIPOD recommendations were used as a reporting  
37 benchmark, however, the relative importance of individual items and what  
38 constitutes an acceptable 'score' is arguable. A risk of bias assessment was  
39 not performed as none exists in this area, however, each study was critiqued  
40  
41  
42  
43  
44  
45  
46  
47  
48  
49  
50  
51  
52  
53  
54  
55  
56  
57  
58  
59  
60



1  
2  
3 against reporting guidance. The absence of impact analysis limits the  
4  
5 recommendation of one model over another. Finally, a meta-analysis was not  
6  
7 performed without access to individual participant data (IPD). Expert guidance  
8  
9 now exists in this area and offers opportunities to improve the scope of  
10  
11 external validation research.[48 49]  
12  
13

### 14 15 16 17 18 **Comparison with previous systematic reviews** 19

20  
21 Both this study and a review of CI-AKI models found pre-existing predictors -  
22  
23 age, CKD, diabetes and heart failure to be the most commonly included.[15] A  
24  
25 Cardiac surgery review reported specialty specific predictors in addition to  
26  
27 these chronic co-morbidities. A non-Cardiac surgery review (5 of 6 studies in  
28  
29 liver transplantation or resection) reported age, CKD and diabetes in at least  
30  
31 two models.[17] Finally, a liver transplantation review highlighted the  
32  
33 importance of CKD and (unsurprisingly) liver dysfunction.[16] The present  
34  
35 review found drugs or acute laboratory values frequently included, though few  
36  
37 models included acute physiological parameters. Our study and the non-  
38  
39 Cardiac surgery review included adherence to recommended TRIPOD  
40  
41 reporting with similar shortcomings. Across the other reviews, only in the  
42  
43 fields of CI-AKI and Cardiac surgery were external validations reported.[14 15]  
44  
45 Ease of use (including if necessary a calculator) and potential for electronic  
46  
47 automation were rarely considered across the models reviewed. No impact  
48  
49 analysis studies have been described.  
50  
51  
52  
53  
54  
55  
56  
57  
58  
59  
60

## Future directions

Management of HA-AKI presents a significant challenge, that could be helped by robust prediction models to risk stratify, encourage prevention and prompt recognition, key healthcare priorities.[6 10] Appraisal and synthesis of prediction studies may enable clinicians and policymakers judge model utility however, this is problematic when key study details are not reported.[12] Though much of the AKI literature is on (often assumed) hospital-acquired AKI, the majority of cases arise from the community (CA-AKI).[50 51] Indeed, a recent study demonstrated a significant proportion of such patients are never hospitalised.[52] This review suggests even in HA-AKI, the strongest predictors are pre-existing patient factors. The only laboratory measure frequently included – serum bicarbonate – may also reflect a chronic component. It is likely a proportion of cases classed as HA-AKI represent (evolving) community cases, thus, models using such pre-existing risk factors makes clinical sense. This continuum of harm between community and hospital could suggest that a risk prediction model in place at, or even *before* hospital admission, combined with early flagging of those who have met AKI criteria, may be required to improve outcomes. Electronic linkage of patient records between community and hospital data is desirable to ensure accurate inclusion of predictors (chronic morbidity, medication, laboratory and physiological parameters). This may also enable bedside automation as part of clinical workflow, where there is evidence beneficial implementation can be achieved.[18 53]

1  
2  
3 Impact analysis in prediction research is sparse making it difficult to conclude  
4 whether a model is worth implementing alongside, or replacing, usual  
5 care.[54] This is important as for example, one study suggested clinical  
6 acumen may be superior to prediction models,[55] whilst another found the  
7 combination of a model with clinical acumen was better than either alone.[56]  
8  
9 Some impact analyses have suggested benefit, but conclusions are limited  
10 due to their rarity and design (mostly before-after without control).[57] There  
11 are a number of potential areas for impact analysis and clinical  
12 implementation (summarised in table 3). First, in specific populations a model  
13 could influence location of peri-operative care of surgical patients or drug  
14 and/or contrast dosing in patients with heart failure. Second, in a wider  
15 hospital setting the effects of highlighting those at highest risk to teams (ward,  
16 outreach critical care or Nephrology) with an adequate effector arm could be  
17 investigated. This has been demonstrated by existing AKI alerts in *established*  
18 AKI where outcome benefit has been limited to patients who had best practice  
19 delivered.[58-60] Third, as healthcare embraces complex technology, the  
20 inclusion of physiological (including urine output) or laboratory trends may be  
21 the only way to significantly improve model performance. Fourth, a model  
22 could identify a high risk group to be further risk stratified by employing one of  
23 the (increasing number of) available renal biomarkers.[61] Finally, one  
24 external validation study found those patients high risk on the prediction  
25 model who did develop AKI had a higher rate of mortality than the low risk  
26 group who developed HA-AKI, indicating the model predicts disease  
27 severity.[44] This could allow early review of such patients to help inform  
28 whether escalation of care may be required, or indeed be appropriate in the  
29  
30  
31  
32  
33  
34  
35  
36  
37  
38  
39  
40  
41  
42  
43  
44  
45  
46  
47  
48  
49  
50  
51  
52  
53  
54  
55  
56  
57  
58  
59  
60

1  
2  
3 increasing number of frail elderly patients admitted to hospitals.  
4  
5  
6  
7

8  
9 To conclude, improving the management of patients to prevent AKI, or reduce  
10 associated complications, is a global health priority. This systematic review  
11 suggests there are few externally validated prediction models to help identify  
12 those at risk of AKI across general hospital populations. Future research  
13 should concentrate on validation, impact analysis and finally exploration of  
14 electronic implementation to enable clinical uptake.  
15  
16  
17  
18  
19  
20  
21  
22  
23  
24  
25  
26  
27  
28  
29  
30  
31  
32  
33  
34  
35  
36  
37  
38  
39  
40  
41  
42  
43  
44  
45  
46  
47  
48  
49  
50  
51  
52  
53  
54  
55  
56  
57  
58  
59  
60

## Tables

Table 1 Summary of HA-AKI prediction models.

| Population                  | General Surgery           |                           | T&O                 | General (Medical & Surgical) |                         |                         |                        |                       | Heart failure         |                          |                     |
|-----------------------------|---------------------------|---------------------------|---------------------|------------------------------|-------------------------|-------------------------|------------------------|-----------------------|-----------------------|--------------------------|---------------------|
| Author, year (n=derivation) | Kheterpal 2007 (n=14,066) | Kheterpal 2009 (n=57,080) | Bell 2015 (n=6,220) | Drawz 2008 (n=360)           | Matheny 2010 (n=26,107) | Koyner 2016 (n=202,961) | Bedford 2016 (n=7,556) | Forni 2013 (n=1,867)  | Forman 2004 (n=1,004) | Breidthardt 2011 (n=657) | Wang 2013 (n=1,010) |
| Centres, Design             | 1, R                      | 121, R                    | 3, R                | 3, CC                        | 1, R                    | 5, R                    | 3, R                   | 1, P                  | 11, R                 | 1, P                     | 1, R                |
| Outcome predicted           | eGFR <50 <7 days          | ↑SCr ≥177µmol/l, RRT      | KDIGO ↑SCr          | ↑SCr*                        | RIFLE ↑SCr              | KDIGO ↑SCr 24hr         | KDIGO ↑SCr 72hr        | KDIGO ↑SCr <7 days    | ↑SCr >26.5µmol/l**    | ↑SCr >26.5µmol/l**       | AKIN SCr <48hr      |
| Events                      | 121                       | 561                       | 672                 | 120                          | 1,352                   | 17,541                  | 222                    | 95                    | 271                   | 136                      | 550                 |
| Mortality with outcome      | 15%                       | 42%                       | -                   | -                            | -                       | 6%                      | -                      | 20%                   | 27%                   | 17%                      | 17%                 |
| Mortality no outcome        | 3%^                       | 8%^                       | -                   | -                            | -                       | 1%                      | -                      | 4%                    | -                     | 6%                       | 2%                  |
| Predictors tested           | 30                        | 19                        | 11                  | 19                           | 23                      | 29                      | 35                     | 25                    | 29                    | 48                       | 35                  |
| Predictors included         | 7                         | 9                         | 7                   | 7                            | 27                      | 29                      | 12                     | 7                     | 4                     | 3                        | 8                   |
| Derivation AUROC            | 0.77                      | 0.80                      | 0.74                | 0.73                         | 0.75                    | -                       | -                      | 0.72                  | -                     | 0.71                     | 0.76                |
| IV AUROC                    | -                         | 0.80                      | 0.73                | 0.66                         | -                       | 0.74                    | 0.67                   | 0.76                  | -                     | -                        | 0.76                |
| EV AUROC                    | 0.67                      | -                         | 0.71                | -                            | -                       | -                       | 0.71                   | 0.65-0.71             | 0.65, 0.65            | -                        | -                   |
| Derivation Calibration      | RR                        | RR                        | Plot                | -                            | H-L P=0.29              | -                       | -                      | H-L P=0.96            | -                     | -                        | H-L P=0.98          |
| IV Calibration              | -                         | RR                        | Plot                | RR                           | -                       | -                       | H-L P=0.04             | -                     | -                     | -                        | H-L P=0.13          |
| EV Calibration              | RR                        | -                         | Plot                | -                            | -                       | -                       | H-L P=0.12             | H-L P=0.06-0.09, Plot | RR                    | -                        | -                   |
| TRIPOD                      | 25                        | 28                        | 34                  | 26                           | 28                      | 24                      | 29                     | 29                    | 26                    | 23                       | 30                  |
| Bedside calculation         | -                         | -                         | -                   | -                            | -                       | -                       | -                      | Yes                   | Yes                   | Yes                      | Yes                 |
| Electronic Automation       | -                         | -                         | Yes***              | Yes                          | -                       | Yes                     | -                      | Yes                   | Yes                   | Yes                      | Yes                 |

1  
2  
3  
4  
5  
6  
7 Design: R - retrospective, P – prospective, CC – case-control, Mortality - In-hospital. AUROC – area under the receiver operating characteristic curve, Plot –  
8 Calibration plot, EV – external validation, H-L – Hosmer-Lemeshow test, IV – internal validation, RR – risk range, RRT – renal replacement therapy, SCr –  
9 serum creatinine, TRIPOD – how many of the 37 recommended items were reported. \*Increase sCr  $\geq 44\mu\text{mol/L}$  if baseline SCr of  $\leq 168\mu\text{mol/L}$ ,  $\geq 88\mu\text{mol/L}$   
10 baseline  $177\text{--}433\mu\text{mol/L}$  &  $\geq 133\mu\text{mol/L}$  baseline  $>442\mu\text{mol/L}$ . \*\*During admission, \*\*\*Used linked community and hospital data, ^Propensity matched.  
11  
12  
13  
14  
15  
16  
17  
18  
19  
20  
21  
22  
23  
24  
25  
26  
27  
28  
29  
30  
31  
32  
33  
34  
35  
36  
37  
38  
39  
40  
41  
42  
43  
44  
45  
46  
47  
48  
49

For peer review only

**Table 2** Summary of limitations in methodology and reporting

| Area of concern                                | Description                                                                                                                                                                                                                                                                |
|------------------------------------------------|----------------------------------------------------------------------------------------------------------------------------------------------------------------------------------------------------------------------------------------------------------------------------|
| Missing data                                   | Multiple imputation recommended to avoid bias, rarely described.[12 62]                                                                                                                                                                                                    |
| Definitions of outcome and predictors          | No consistent strategy used to differentiate CA-AKI from HA-AKI. Two studies excluded patients with pre-existing CKD,[32 36] admission SCr frequently taken to be baseline; some studies defined co-morbidities from admission diagnoses whilst others used coded history. |
| Blinding of predictors or outcome              | Not reported.                                                                                                                                                                                                                                                              |
| Sample size                                    | Calculations not described, five studies had <10 EPV. Small sample increases risk of overfitting and underfitting.[12]                                                                                                                                                     |
| Univariate to select for multivariate analysis | Technique not recommended,[12] but used in 10 of 11 models.                                                                                                                                                                                                                |
| Bootstrapping                                  | Can adjust for optimism, without losing information - rarely described.[34 42]                                                                                                                                                                                             |
| Calibration plots                              | Important part of model performance,[12] present in only one model and one external validation.[34 44]                                                                                                                                                                     |
| External validation and model updating         | Validation adjusts for optimism, assesses generalizability, but was scarce, whilst model updating is recommended but not described.[12]                                                                                                                                    |
| Newer performance measures                     | Techniques such as decision curve analysis offer insight into clinical consequences - not described.[28]                                                                                                                                                                   |
| Use of data linkage                            | Only one study utilised data linkage.[34]                                                                                                                                                                                                                                  |

CA-AKI – community-acquired AKI, CKD – chronic kidney disease, EPV – events per variable, HA-AKI – hospital-acquired AKI, SCr – serum Creatinine.

**Table 3.** Potential areas for future Impact analysis of AKI prediction models

| Population            | Impact analysis to inform Clinical use                                                                                                      |
|-----------------------|---------------------------------------------------------------------------------------------------------------------------------------------|
| General Surgery       | Peri-operative: haemodynamic targets, place of care, drugs, contrast delivery                                                               |
| Trauma & Orthopaedics |                                                                                                                                             |
| General Populations   | Risk stratification of large populations: intensity of observations, remote monitoring, application of biomarkers in subgroups at high-risk |
| Heart failure         | Optimise haemodynamic status: diuretic dosing, use/volume of contrast                                                                       |

## Legends to Figures

**Figure 1** – PRISMA study flow chart

**Figure 2** – Predictors most frequently included in the 11 AKI prediction models. ACEi – Angiotensin-converting enzyme inhibitors, ARBs – Angiotensin-receptor blockers, Bloods – laboratory parameters, CKD – chronic kidney disease, ↓HCO<sub>3</sub> – reduced serum bicarbonate, ↑WCC - raised white cell count.

## Competing interests statement

*“All authors have completed the Unified Competing Interest form at [www.icmje.org/coi\\_disclosure.pdf](http://www.icmje.org/coi_disclosure.pdf) and declare that all have no relationships with companies that might have an interest in the submitted work in the previous 3 years; their spouses, partners, or children have no financial relationships that may be relevant to the submitted work; and have no non-financial interests that may be relevant to the submitted work.”*

All authors had full access to all of the data (including statistical reports and tables) in the study and take responsibility for the integrity of the data and the accuracy of the data analysis. The lead author affirms that the manuscript is an honest, accurate, and transparent account of the study being reported and no important aspects of the study have been omitted.

**Contributors:** LH, LF, RV BDD and PR developed the idea for the study. LH, AS, LF, BDD and PR were involved in the study conception, preliminary literature review and design of the search strategy and the study protocol. LH, AS and LF were involved in screening and data extraction of papers. All



1  
2  
3  
4  
5  
6  
7  
8  
9  
10  
11  
12  
13  
14  
15  
16  
17  
18  
19  
20  
21  
22  
23  
24  
25  
26  
27  
28  
29  
30  
31  
32  
33  
34  
35  
36  
37  
38  
39  
40  
41  
42  
43  
44  
45  
46  
47  
48  
49  
50  
51  
52  
53  
54  
55  
56  
57  
58  
59  
60

authors reviewed data extraction output. LH drafted the manuscript, which was critically reviewed and approved by all authors.

**Funding:** This research received no specific grant from any funding agency in the public, commercial or not-for-profit sectors’.

For peer review only

## References

1. KDIGO Clinical Practice Guideline for Acute Kidney Injury. *Kidney Int* 2012;**Suppl 2**(1):1-136 doi: 10.1038/kisup.2012.6published Online First: Epub Date]].
2. Susantitaphong P, Cruz DN, Cerda J, et al. World incidence of AKI: a meta-analysis. *Clin J Am Soc Nephrol* 2013;**8**(9):1482-93 doi: 10.2215/cjn.00710113published Online First: Epub Date]].
3. Bellomo R, Kellum JA, Ronco C. Acute kidney injury. *Lancet* 2012;**380**(9843):756-66 doi: 10.1016/s0140-6736(11)61454-2published Online First: Epub Date]].
4. Bellomo R, Kellum J, Ronco C. Acute renal failure: time for consensus. *Intensive Care Med* 2001;**27**(11):1685-8 doi: 10.1007/s00134-001-1120-6published Online First: Epub Date]].
5. Bagshaw SM, Gibney RT. Conventional markers of kidney function. *Crit Care Med* 2008;**36**(4 Suppl):S152-8 doi: 10.1097/CCM.0b013e318168c613published Online First: Epub Date]].
6. National Confidential Enquiry into Patient Outcome and Death. Adding insult to injury: a review of the care of patients who died in hospital with a primary diagnosis of acute kidney injury (acute renal failure) [http://www.ncepod.org.uk/2009report1/Downloads/AKI\\_report.pdf](http://www.ncepod.org.uk/2009report1/Downloads/AKI_report.pdf): NCEPOD, 2009.
7. *National Institute for Health and Care Excellence. Acute Kidney Injury: Prevention, Detection and Management Up to the Point of Renal Replacement Therapy. (Clinical guideline CG169)*. London: National Clinical Guideline Centre., 2013.
8. Rabar S, Lau R, O'Flynn N, Li L, Barry P. Risk assessment of fragility fractures: summary of NICE guidance. *BMJ* 2012;**345**:e3698 doi: 10.1136/bmj.e3698published Online First: Epub Date]].
9. Goff DC, Jr., Lloyd-Jones DM, Bennett G, et al. 2013 ACC/AHA guideline on the assessment of cardiovascular risk: a report of the American College of Cardiology/American Heart Association Task Force on Practice Guidelines. *Circulation* 2014;**129**(25 Suppl 2):S49-73 doi: 10.1161/01.cir.0000437741.48606.98published Online First: Epub Date]].
10. Mehta RL, Cerda J, Burdmann EA, et al. International Society of Nephrology's 0by25 initiative for acute kidney injury (zero preventable deaths by 2025): a human rights case for nephrology. *The Lancet* doi: 10.1016/S0140-6736(15)60126-Xpublished Online First: Epub Date]].
11. Kyzas PA, Denaxa-Kyza D, Ioannidis JP. Almost all articles on cancer prognostic markers report statistically significant results. *Eur J Cancer* 2007;**43**(17):2559-79 doi: 10.1016/j.ejca.2007.08.030published Online First: Epub Date]].
12. Moons KG, Altman DG, Reitsma JB, et al. Transparent Reporting of a multivariable prediction model for Individual Prognosis or Diagnosis (TRIPOD): explanation and elaboration. *Ann Intern Med* 2015;**162**(1):W1-73 doi: 10.7326/M14-0698published Online First: Epub Date]].
13. Bouwmeester W, Zuithoff NP, Mallett S, et al. Reporting and methods in clinical prediction research: a systematic review. *PLoS Med* 2012;**9**(5):1-

- 12 doi: 10.1371/journal.pmed.1001221published Online First: Epub Date]].
14. Huen SC, Parikh CR. Predicting acute kidney injury after cardiac surgery: a systematic review. *Ann Thorac Surg* 2012;**93**(1):337-47 doi: 10.1016/j.athoracsur.2011.09.010published Online First: Epub Date]].
15. Silver SA, Shah PM, Chertow GM, Harel S, Wald R, Harel Z. Risk prediction models for contrast induced nephropathy: systematic review. *BMJ* 2015;**351**:h4395 doi: 10.1136/bmj.h4395published Online First: Epub Date]].
16. Caragata R, Wyssusek KH, Kruger P. Acute kidney injury following liver transplantation: a systematic review of published predictive models. *Anaesth Intensive Care* 2016;**44**(2):251-61
17. Wilson T, Quan S, Cheema K, et al. Risk prediction models for acute kidney injury following major noncardiac surgery: systematic review. *Nephrol Dial Transplant* 2016;**31**(2):231-40 doi: 10.1093/ndt/gfv415published Online First: Epub Date]].
18. Kawamoto K, Houlihan CA, Balas EA, Lobach DF. Improving clinical practice using clinical decision support systems: a systematic review of trials to identify features critical to success. *BMJ* 2005;**330**(7494):765 doi: 10.1136/bmj.38398.500764.8Fpublished Online First: Epub Date]].
19. Altman DG. Systematic reviews of evaluations of prognostic variables. *BMJ* 2001;**323**(7306):224-8
20. Moons KG, de Groot JA, Bouwmeester W, et al. Critical appraisal and data extraction for systematic reviews of prediction modelling studies: the CHARMS checklist. *PLoS Med* 2014;**11**(10):e1001744 doi: 10.1371/journal.pmed.1001744published Online First: Epub Date]].
21. Hospital Episode Statistics Analysis HaSCIC. Hospital Episode Statistics: Admitted patient care - 2014-15. <http://www.hscic.gov.uk/pubs/hes1415>: Health and Social Care Information Centre, 2015.
22. Selby NM, Crowley L, Fluck RJ, et al. Use of electronic results reporting to diagnose and monitor AKI in hospitalized patients. *Clin J Am Soc Nephrol* 2012;**7**(4):533-40 doi: 10.2215/cjn.08970911published Online First: Epub Date]].
23. Porter CJ, Juurlink I, Bisset LH, Bavakunji R, Mehta RL, Devonald MA. A real-time electronic alert to improve detection of acute kidney injury in a large teaching hospital. *Nephrol Dial Transplant* 2014;**29**(10):1888-93 doi: 10.1093/ndt/gfu082published Online First: Epub Date]].
24. Antman EM, Lau J, Kupelnick B, Mosteller F, Chalmers TC. A comparison of results of meta-analyses of randomized control trials and recommendations of clinical experts. *Treatments for myocardial infarction. JAMA* 1992;**268**(2):240-8
25. Oxman AD, Guyatt GH. The science of reviewing research. *Ann N Y Acad Sci* 1993;**703**:125-33; discussion 33-4
26. Geersing GJ, Bouwmeester W, Zuithoff P, Spijker R, Leeflang M, Moons KG. Search filters for finding prognostic and diagnostic prediction studies in Medline to enhance systematic reviews. *PLoS One* 2012;**7**(2):e32844 doi: 10.1371/journal.pone.0032844published Online First: Epub Date]].

- 1  
2  
3 27. Wilczynski NL, McKibbin KA, Walter SD, Garg AX, Haynes RB. MEDLINE  
4 clinical queries are robust when searching in recent publishing years. J  
5 Am Med Inform Assoc 2013;**20**(2):363-8 doi: 10.1136/amiajnl-2012-  
6 001075published Online First: Epub Date]].  
7  
8 28. Vickers AJ, Elkin EB. Decision curve analysis: a novel method for evaluating  
9 prediction models. Med Decis Making 2006;**26**(6):565-74 doi:  
10 10.1177/0272989x06295361published Online First: Epub Date]].  
11 29. Cook NR. Use and misuse of the receiver operating characteristic curve in  
12 risk prediction. Circulation 2007;**115**(7):928-35 doi:  
13 10.1161/circulationaha.106.672402published Online First: Epub Date]].  
14 30. Hosmer DW, Hjort NL. Goodness-of-fit processes for logistic regression:  
15 simulation results. Stat Med 2002;**21**(18):2723-38 doi:  
16 10.1002/sim.1200published Online First: Epub Date]].  
17 31. Kramer AA, Zimmerman JE. Assessing the calibration of mortality  
18 benchmarks in critical care: The Hosmer-Lemeshow test revisited. Crit  
19 Care Med 2007;**35**(9):2052-6 doi:  
20 10.1097/01.ccm.0000275267.64078.b0published Online First: Epub  
21 Date]].  
22 32. Kheterpal S, Tremper KK, Englesbe MJ, et al. Predictors of postoperative  
23 acute renal failure after noncardiac surgery in patients with previously  
24 normal renal function. Anesthesiology 2007;**107**(6):892-902 doi:  
25 10.1097/01.anes.0000290588.29668.38published Online First: Epub  
26 Date]].  
27 33. Kheterpal S, Tremper KK, Heung M, et al. Development and validation of an  
28 acute kidney injury risk index for patients undergoing general surgery:  
29 results from a national data set. Anesthesiology 2009;**110**(3):505-15 doi:  
30 10.1097/ALN.0b013e3181979440published Online First: Epub Date]].  
31 34. Bell S, Dekker FW, Vadiveloo T, et al. Risk of postoperative acute kidney  
32 injury in patients undergoing orthopaedic surgery-development and  
33 validation of a risk score and effect of acute kidney injury on survival:  
34 observational cohort study. BMJ 2015;**351**:h5639 doi:  
35 10.1136/bmj.h5639published Online First: Epub Date]].  
36 35. Forni LG, Dawes T, Sinclair H, et al. Identifying the patient at risk of acute  
37 kidney injury: a predictive scoring system for the development of acute  
38 kidney injury in acute medical patients. Nephron Clin Pract 2013;**123**(3-  
39 4):143-50 doi: 10.1159/000351509published Online First: Epub Date]].  
40 36. Matheny ME, Miller RA, Ikizler TA, et al. Development of inpatient risk  
41 stratification models of acute kidney injury for use in electronic health  
42 records. Med Decis Making 2010;**30**(6):639-50 doi:  
43 10.1177/0272989X10364246published Online First: Epub Date]].  
44 37. Drawz PE, Miller RT, Sehgal AR. Predicting hospital-acquired acute kidney  
45 injury--a case-controlled study. Ren Fail 2008;**30**(9):848-55 doi:  
46 10.1080/08860220802356515published Online First: Epub Date]].  
47 38. Bedford M, Stevens P, Coulton S, et al. *Development of risk models for the*  
48 *prediction of new or worsening acute kidney injury on or during hospital*  
49 *admission: a cohort and nested study*. Southampton UK: Queen's Printer  
50 and Controller of HMSO., 2016.  
51 39. Koyner JL, Adhikari R, Edelson DP, Churpek MM. Development of a  
52 Multicenter Ward-Based AKI Prediction Model. Clin J Am Soc Nephrol  
53  
54  
55  
56  
57  
58  
59  
60

- 2016;**11**(11):1935-43 doi: 10.2215/cjn.00280116published Online First: Epub Date]].
40. Breidthardt T, Socrates T, Noveanu M, et al. Effect and clinical prediction of worsening renal function in acute decompensated heart failure. *Am J Cardiol* 2011;**107**(5):730-5 doi: 10.1016/j.amjcard.2010.10.056published Online First: Epub Date]].
41. Wang YN, Cheng H, Yue T, Chen YP. Derivation and validation of a prediction score for acute kidney injury in patients hospitalized with acute heart failure in a Chinese cohort. *Nephrology (Carlton)* 2013;**18**(7):489-96 doi: 10.1111/nep.12092published Online First: Epub Date]].
42. Forman DE, Butler J, Wang Y, et al. Incidence, predictors at admission, and impact of worsening renal function among patients hospitalized with heart failure. *J Am Coll Cardiol* 2004;**43**(1):61-7
43. Xing XZ, Wang HJ, Huang CL, et al. Two acute kidney injury risk scores for critically ill cancer patients undergoing non-cardiac surgery. *World J Emerg Med* 2012;**3**(4):278-81 doi: 10.5847/wjem.j.1920-8642.2012.04.007published Online First: Epub Date]].
44. Hodgson L, Dimitrov, BD, Roderick, PJ, Venn, R, LG, Forni. Predicting AKI in Emergency Admissions: An external validation study of the acute kidney injury prediction score (APS). *Bmj Open* 2017;**In Press**
45. Noble D, Mathur R, Dent T, Meads C, Greenhalgh T. Risk models and scores for type 2 diabetes: systematic review. *BMJ* 2011;**343**:d7163 doi: 10.1136/bmj.d7163published Online First: Epub Date]].
46. Collins GS, Mallett S, Omar O, Yu LM. Developing risk prediction models for type 2 diabetes: a systematic review of methodology and reporting. *BMC Med* 2011;**9**:103 doi: 10.1186/1741-7015-9-103published Online First: Epub Date]].
47. Mallett S, Royston P, Dutton S, Waters R, Altman DG. Reporting methods in studies developing prognostic models in cancer: a review. *BMC Med* 2010;**8**:20 doi: 10.1186/1741-7015-8-20published Online First: Epub Date]].
48. Riley RD, Ensor J, Snell KIE, et al. External validation of clinical prediction models using big datasets from e-health records or IPD meta-analysis: opportunities and challenges. *BMJ* 2016;**353** doi: 10.1136/bmj.i3140published Online First: Epub Date]].
49. Debray TPA, Damen JAAG, Snell KIE, et al. A guide to systematic review and meta-analysis of prediction model performance. *BMJ* 2017;**356** doi: 10.1136/bmj.i6460published Online First: Epub Date]].
50. Wonnacott A, Meran S, Amphlett B, Talabani B, Phillips A. Epidemiology and outcomes in community-acquired versus hospital-acquired AKI. *Clin J Am Soc Nephrol* 2014;**9**(6):1007-14 doi: 10.2215/cjn.07920713published Online First: Epub Date]].
51. Xu X, Nie S, Liu Z, et al. Epidemiology and Clinical Correlates of AKI in Chinese Hospitalized Adults. *Clin J Am Soc Nephrol* 2015;**10**(9):1510-8 doi: 10.2215/cjn.02140215published Online First: Epub Date]].
52. Sawhney S, Fluck N, Fraser SD, et al. KDIGO-based acute kidney injury criteria operate differently in hospitals and the community-findings from a large population cohort. *Nephrol Dial Transplant* 2016;**31**(6):922-9 doi: 10.1093/ndt/gfw052published Online First: Epub Date]].

- 1  
2  
3 53. Kannry J, McCullagh L, Kushniruk A, Mann D, Edonyabo D, McGinn T. A  
4 Framework for Usable and Effective Clinical Decision Support: Experience  
5 from the iCPR Randomized Clinical Trial. *EGEMS (Wash DC)*  
6 2015;**3**(2):1150 doi: 10.13063/2327-9214.1150published Online First:  
7 Epub Date]].  
8  
9 54. Toll DB, Janssen KJ, Vergouwe Y, Moons KG. Validation, updating and impact  
10 of clinical prediction rules: a review. *J Clin Epidemiol* 2008;**61**(11):1085-  
11 94 doi: 10.1016/j.jclinepi.2008.04.008published Online First: Epub  
12 Date]].  
13 55. Sinuff T, Adhikari NK, Cook DJ, et al. Mortality predictions in the intensive  
14 care unit: comparing physicians with scoring systems. *Crit Care Med*  
15 2006;**34**(3):878-85 doi:  
16 10.1097/01.ccm.0000201881.58644.41published Online First: Epub  
17 Date]].  
18  
19 56. Brabrand M, Hallas J, Knudsen T. Nurses and physicians in a medical  
20 admission unit can accurately predict mortality of acutely admitted  
21 patients: a prospective cohort study. *PLoS One* 2014;**9**(7):e101739 doi:  
22 10.1371/journal.pone.0101739published Online First: Epub Date]].  
23  
24 57. Fillmore CL, Bray BE, Kawamoto K. Systematic review of clinical decision  
25 support interventions with potential for inpatient cost reduction. *BMC*  
26 *Med Inform Decis Mak* 2013;**13**:135 doi: 10.1186/1472-6947-13-  
27 135published Online First: Epub Date]].  
28  
29 58. Wilson FP, Shashaty M, Testani J, et al. Automated, electronic alerts for acute  
30 kidney injury: a single-blind, parallel-group, randomised controlled trial.  
31 *Lancet* 2015 doi: 10.1016/s0140-6736(15)60266-5published Online  
32 First: Epub Date]].  
33  
34 59. Kolhe NV, Reilly T, Leung J, et al. A simple care bundle for use in acute kidney  
35 injury: a propensity score-matched cohort study. *Nephrol Dial Transplant*  
36 2016;**31**(11):1846-54 doi: 10.1093/ndt/gfw087published Online First:  
37 Epub Date]].  
38  
39 60. Kolhe NV, Staples D, Reilly T, et al. Impact of Compliance with a Care Bundle  
40 on Acute Kidney Injury Outcomes: A Prospective Observational Study.  
41 *PLoS One* 2015;**10**(7):e0132279 doi:  
42 10.1371/journal.pone.0132279published Online First: Epub Date]].  
43  
44 61. Murray PT, Mehta RL, Shaw A, et al. Current Use of Biomarkers in Acute  
45 Kidney Injury: Report and Summary of Recommendations from the 10(th)  
46 Acute Dialysis Quality Initiative Consensus Conference. *Kidney*  
47 *international* 2014;**85**(3):513-21 doi: 10.1038/ki.2013.374published  
48 Online First: Epub Date]].  
49  
50 62. Donders AR, van der Heijden GJ, Stijnen T, Moons KG. Review: a gentle  
51 introduction to imputation of missing values. *J Clin Epidemiol*  
52 2006;**59**(10):1087-91 doi: 10.1016/j.jclinepi.2006.01.014published  
53 Online First: Epub Date]].  
54  
55  
56  
57  
58  
59  
60

1  
2  
3  
4  
5  
6  
7  
8  
9  
10  
11  
12  
13  
14  
15  
16  
17  
18  
19  
20  
21  
22  
23  
24  
25  
26  
27  
28  
29  
30  
31  
32  
33  
34  
35  
36  
37  
38  
39  
40  
41  
42  
43  
44  
45  
46  
47  
48  
49  
50  
51  
52  
53  
54  
55  
56  
57  
58  
59  
60

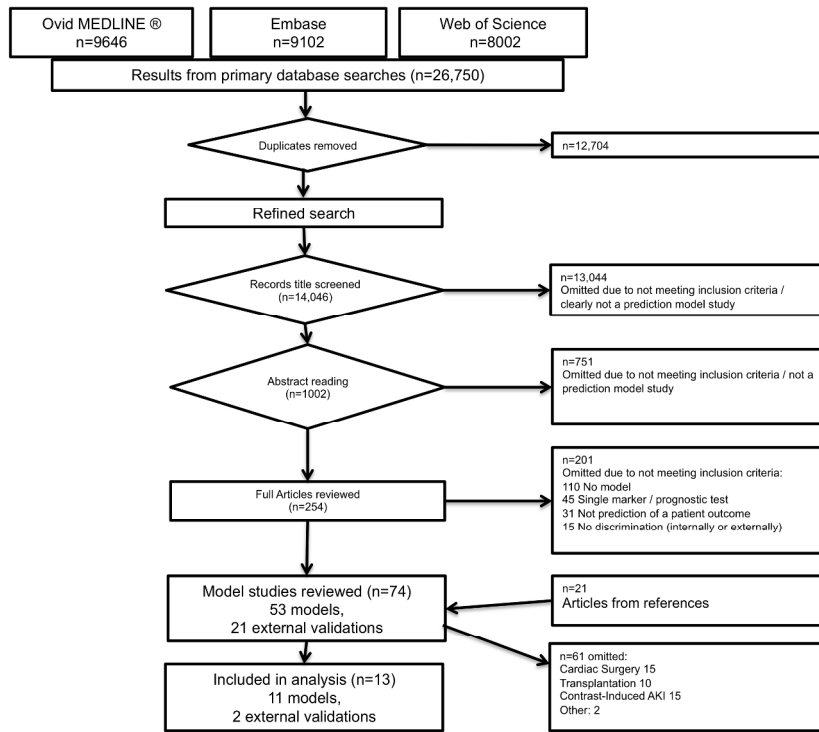

Figure 1 – PRISMA study flow chart

1057x793mm (72 x 72 DPI)

ew only

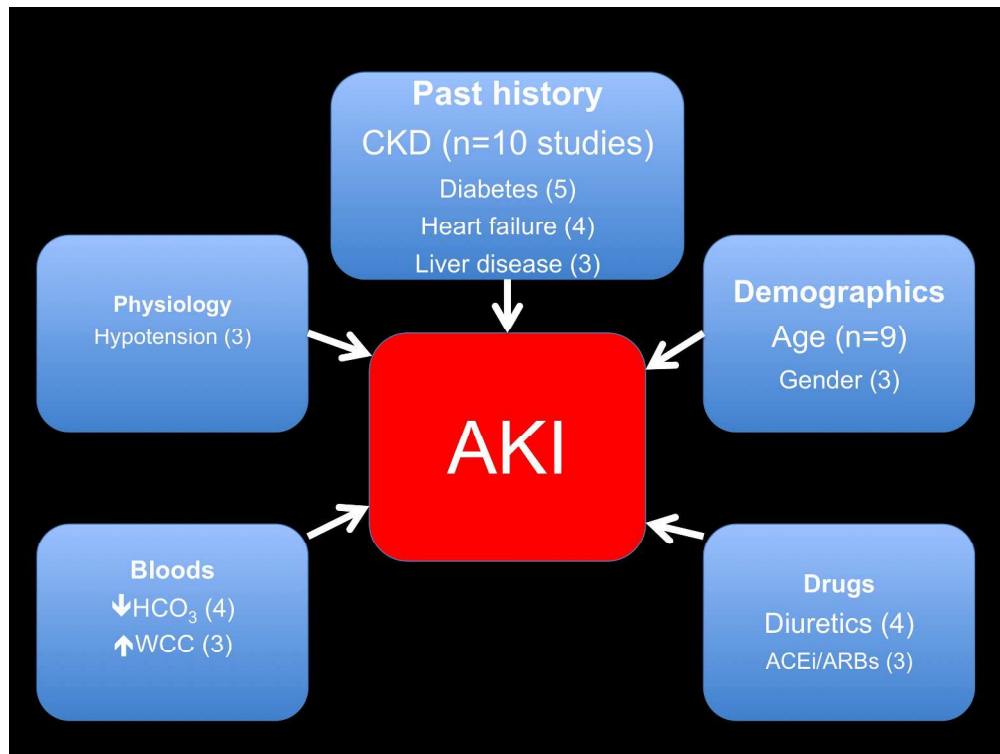

Figure 2 – Predictors most frequently included in the 11 AKI prediction models. ACEi – Angiotensin-converting enzyme inhibitors, ARBs – Angiotensin-receptor blockers, Bloods – laboratory parameters, CKD – chronic kidney disease, ↓HCO<sub>3</sub> – reduced serum bicarbonate, ↑WCC – raised white cell count.

1057x793mm (72 x 72 DPI)

For peer review only



1  
2  
3  
4  
5  
6  
7  
8  
9  
10  
11  
12  
13  
14  
15  
16  
17  
18  
19  
20  
21  
22  
23  
24  
25  
26  
27  
28  
29  
30  
31  
32  
33  
34  
35  
36  
37  
38  
39  
40  
41  
42  
43  
44  
45  
46  
47  
48  
49  
50  
51  
52  
53  
54  
55  
56  
57  
58  
59  
60

**Online Supplementary file**

**eTable 1** Study inclusion criteria

**eTable 2** Embase Search

**eTable 3** Ovid MEDLINE® search

**eTable 4** - Web of Science search

**eTable 5** - CHARMS checklist and data extracted for systematic review

**eTable 6(i-iv)** – Full details of models reviewed

**eTable 7** – Abbreviations used

**eTable 8** - TRIPOD items reported in the 11 studies

**eTable 9** – Most common predictors used in the 11 models

**eTable 10** – All predictors included in the 11 models

For peer review only

**eTable 1** - Study inclusion criteria.

---

| <b>Inclusion Criteria</b>                                                                                                                                                                                                                                                                                                                                                                                                                                                                                                                            |
|------------------------------------------------------------------------------------------------------------------------------------------------------------------------------------------------------------------------------------------------------------------------------------------------------------------------------------------------------------------------------------------------------------------------------------------------------------------------------------------------------------------------------------------------------|
| <ul style="list-style-type: none"><li>Articles in peer-reviewed journals reporting a prognostic multivariable prediction model (scoring system or algorithm) identifying patients who developed HA-AKI (or other measures of renal dysfunction in older studies)</li><li>Validation studies (and updating) of an existing model</li><li>Retrospective, prospective and case-control designs</li><li>Adults (<math>\geq 18</math> years) in general hospital settings</li><li>Statistical measures of discrimination (AUROC or c-statistic)</li></ul> |

---

| <b>Exclusion Criteria</b>                                                                                                                                                                                                                                                                                                                                                                                                                                                                                                                                                                                                                                                                                                                                 |
|-----------------------------------------------------------------------------------------------------------------------------------------------------------------------------------------------------------------------------------------------------------------------------------------------------------------------------------------------------------------------------------------------------------------------------------------------------------------------------------------------------------------------------------------------------------------------------------------------------------------------------------------------------------------------------------------------------------------------------------------------------------|
| <ul style="list-style-type: none"><li>Patients <math>&lt; 18</math> years old</li><li>Cardiac surgery, other specialised surgery (e.g. transplantation), CI-AKI</li><li>Non-human studies</li><li>Case reports or conference abstracts</li><li>Only logistic regression without a prediction model</li><li>Lack of discrimination statistics (unless model validated elsewhere)</li><li>Studies that investigated a single predictor, test, or marker</li><li>Studies that investigated only causality between one or more predictors &amp; an outcome</li><li>Use of patients already with the outcome (e.g. AKI present at hospital admission)</li><li>Patients in primary care</li><li>Novel, not widely available tests, such as biomarkers</li></ul> |

---

AUROC - area under the receiver-operating characteristic curve, CI-AKI – Contrast-Induced AKI, HA-AKI - hospital-acquired-AKI.

eTable 2 - Embase Search

| RESULTS     | LINE | SEARCH TERM                                          |
|-------------|------|------------------------------------------------------|
| 16946       | 1    | (acute AND kidney AND injury).ti,ab                  |
| 7601        | 2    | AKI.ti,ab                                            |
| 42560       | 3    | (acute AND renal AND failure).ti,ab                  |
| 10263       | 4    | ARF.ti,ab                                            |
| 2911        | 5    | (contrast AND induced AND nephropathy).ti,ab         |
| 31958       | 6    | ACUTE KIDNEY INJURY/                                 |
| 78043       | 7    | 1 OR 2 OR 3 OR 4 OR 5 OR 6                           |
| 1277060     | 8    | predict*.ti,ab                                       |
| 71645       | 9    | PREDICTIVE VALUE OF TESTS/                           |
| 835041      | 10   | scor*.ti,ab                                          |
| 2999344     | 11   | observ*.ti,ab                                        |
| 17216       | 12   | OBSERVER VARIATION/                                  |
| 4625679     | 13   | 8 OR 9 OR 10 OR 11 OR 12                             |
| 20315       | 14   | 7 AND 13                                             |
| 16946       | 15   | (acute AND kidney AND injury).ti,ab                  |
| 7601        | 16   | AKI.ti,ab                                            |
| 42560       | 17   | (acute AND renal AND failure).ti,ab                  |
| 10263       | 18   | ARF.ti,ab                                            |
| 2911        | 19   | (contrast AND induced AND nephropathy).ti,ab         |
| 48915       | 20   | ACUTE KIDNEY FAILURE/                                |
| 84125       | 21   | 15 OR 16 OR 17 OR 18 OR 19 OR 20                     |
| 1277060     | 22   | predict*.ti,ab                                       |
| 3711942     | 23   | exp METHODOLOGY/                                     |
| 400667      | 24   | validat*.ti,ab                                       |
| 4889839     | 25   | 22 OR 23 OR 24                                       |
| 18916       | 26   | 21 AND 25                                            |
| <b>9102</b> | 27   | 14 [Limit to: Human and (Publication Types Article)] |

eTable 3 Ovid MEDLINE® search

| Results     | Line | Search term                                                                                                                                                                                                                                                                                                                                                                                                                                                                                                               |
|-------------|------|---------------------------------------------------------------------------------------------------------------------------------------------------------------------------------------------------------------------------------------------------------------------------------------------------------------------------------------------------------------------------------------------------------------------------------------------------------------------------------------------------------------------------|
| 10612       | 1    | (acute AND kidney AND injury).ti,ab                                                                                                                                                                                                                                                                                                                                                                                                                                                                                       |
| 4343        | 2    | AKI.ti,ab                                                                                                                                                                                                                                                                                                                                                                                                                                                                                                                 |
| 30834       | 3    | (acute AND renal AND failure).ti,ab                                                                                                                                                                                                                                                                                                                                                                                                                                                                                       |
| 8629        | 4    | ARF.ti,ab                                                                                                                                                                                                                                                                                                                                                                                                                                                                                                                 |
| 1811        | 5    | (contrast AND induced AND nephropathy).ti,ab                                                                                                                                                                                                                                                                                                                                                                                                                                                                              |
| 33267       | 6    | ACUTE KIDNEY INJURY/                                                                                                                                                                                                                                                                                                                                                                                                                                                                                                      |
| 60802       | 7    | 28 OR 29 OR 30 OR 31 OR 32 OR 33                                                                                                                                                                                                                                                                                                                                                                                                                                                                                          |
| 1005899     | 8    | predict*.ti,ab                                                                                                                                                                                                                                                                                                                                                                                                                                                                                                            |
| 149557      | 9    | PREDICTIVE VALUE OF TESTS/                                                                                                                                                                                                                                                                                                                                                                                                                                                                                                |
| 581297      | 10   | scor*.ti,ab                                                                                                                                                                                                                                                                                                                                                                                                                                                                                                               |
| 2581563     | 11   | observ*.ti,ab                                                                                                                                                                                                                                                                                                                                                                                                                                                                                                             |
| 33069       | 12   | OBSERVER VARIATION/                                                                                                                                                                                                                                                                                                                                                                                                                                                                                                       |
| 3877048     | 13   | 35 OR 36 OR 37 OR 38 OR 39                                                                                                                                                                                                                                                                                                                                                                                                                                                                                                |
| 12929       | 14   | 34 AND 40                                                                                                                                                                                                                                                                                                                                                                                                                                                                                                                 |
| <b>9646</b> | 15   | 41 [Limit to: (Document type Classical Article or Clinical Trial or Clinical Trial, Phase I or Clinical Trial, Phase Ii or Clinical Trial, Phase Iii or Clinical Trial, Phase Iv or Comment or Comparative Study or Controlled Clinical Trial or Corrected And Republished Article or English Abstract or Evaluation Studies or Historical Article or Journal Article or Multicenter Study or Observational Study or Pragmatic Clinical Trial or Randomized Controlled Trial or Report or Validation Studies) and Humans] |

eTable 4 - Web of Science search

| RESULTS | WEB OF SCIENCE SEARCH                                                                                                                                                                                                                                                                                                                                                                                                                                                                                                                                                                                                                                                                                                                                                                                                                                                            |
|---------|----------------------------------------------------------------------------------------------------------------------------------------------------------------------------------------------------------------------------------------------------------------------------------------------------------------------------------------------------------------------------------------------------------------------------------------------------------------------------------------------------------------------------------------------------------------------------------------------------------------------------------------------------------------------------------------------------------------------------------------------------------------------------------------------------------------------------------------------------------------------------------|
| 8002    | <p>(TS=((acute kidney injury) OR (aki) OR (acute renal failure) OR (arf) OR (contrast induced nephropathy)) AND TS=(predict* OR scor* OR observ* OR validat*)) AND DOCUMENT TYPES: (Article) Refined by: WEB OF SCIENCE CATEGORIES: (UROLOGY NEPHROLOGY OR SURGERY OR CARDIAC CARDIOVASCULAR SYSTEMS OR TRANSPLANTATION OR CRITICAL CARE MEDICINE OR MEDICINE GENERAL INTERNAL OR MEDICAL INFORMATICS OR GASTROENTEROLOGY HEPATOLOGY OR ANESTHESIOLOGY ) AND DOCUMENT TYPES: ( ARTICLE ) AND WEB OF SCIENCE CATEGORIES: (UROLOGY NEPHROLOGY OR SURGERY OR CARDIAC CARDIOVASCULAR SYSTEMS OR TRANSPLANTATION OR MEDICAL INFORMATICS OR CRITICAL CARE MEDICINE OR HEALTH CARE SCIENCES SERVICES OR MEDICINE GENERAL INTERNAL OR MEDICAL LABORATORY TECHNOLOGY OR GASTROENTEROLOGY HEPATOLOGY OR ANESTHESIOLOGY OR EMERGENCY MEDICINE ) Indexes=SCI-EXPANDED Timespan=All years</p> |

**eTable 5** - CHARMS checklist and data extracted for systematic review.

| Item                                         | Explanation in the Review                                                                                                                                                                                                                                                                                                                                                                                                                                                                                                                                                                                                                                                                                                                                                                                                                                                                                                                                                                                                                                                                |
|----------------------------------------------|------------------------------------------------------------------------------------------------------------------------------------------------------------------------------------------------------------------------------------------------------------------------------------------------------------------------------------------------------------------------------------------------------------------------------------------------------------------------------------------------------------------------------------------------------------------------------------------------------------------------------------------------------------------------------------------------------------------------------------------------------------------------------------------------------------------------------------------------------------------------------------------------------------------------------------------------------------------------------------------------------------------------------------------------------------------------------------------|
| <b>1. Type of studies</b>                    | Prognostic prediction models                                                                                                                                                                                                                                                                                                                                                                                                                                                                                                                                                                                                                                                                                                                                                                                                                                                                                                                                                                                                                                                             |
| <b>2. Scope</b>                              | Published prognostic prediction models for development of AKI in general hospital settings; to inform risk stratification & potential uses in decision-making in different patient groups                                                                                                                                                                                                                                                                                                                                                                                                                                                                                                                                                                                                                                                                                                                                                                                                                                                                                                |
| <b>3. Type of studies</b>                    | Model development +/- external validation in independent data; external model validation & model updating, if present                                                                                                                                                                                                                                                                                                                                                                                                                                                                                                                                                                                                                                                                                                                                                                                                                                                                                                                                                                    |
| <b>4. Target population</b>                  | Adult ( $\geq 18$ ) Patients in acute hospital environment                                                                                                                                                                                                                                                                                                                                                                                                                                                                                                                                                                                                                                                                                                                                                                                                                                                                                                                                                                                                                               |
| <b>5. Outcome predicted</b>                  | Development of AKI (or equivalent definition, including RRT) after an admission to hospital or Surgery                                                                                                                                                                                                                                                                                                                                                                                                                                                                                                                                                                                                                                                                                                                                                                                                                                                                                                                                                                                   |
| <b>6. Time span of prediction</b>            | In-hospital development of the outcome                                                                                                                                                                                                                                                                                                                                                                                                                                                                                                                                                                                                                                                                                                                                                                                                                                                                                                                                                                                                                                                   |
| <b>7. Intended moment of using the model</b> | Pre-operatively to predict the risk of post-op AKI or need for RRT; at admission to risk stratify or guide therapy                                                                                                                                                                                                                                                                                                                                                                                                                                                                                                                                                                                                                                                                                                                                                                                                                                                                                                                                                                       |
| Summary of Data extracted                    |                                                                                                                                                                                                                                                                                                                                                                                                                                                                                                                                                                                                                                                                                                                                                                                                                                                                                                                                                                                                                                                                                          |
|                                              | <ul style="list-style-type: none"> <li>• Data source (years, retrospective, prospective; cohort, case-control, trial data)</li> <li>• Participants &amp; setting (eg cardiac surgery, single or multi-centre, country)</li> <li>• Primary outcome (and any blinding)</li> <li>• Candidate predictors (definitions; continuous data dichotomised? &amp; how selected for modelling)</li> <li>• Sample size, EPV (including all predictors considered)</li> <li>• Type of model(s) evaluated - derivation, validation (internal, external)</li> <li>• Missing data, number included &amp; excluded (criteria)</li> <li>• Type of model (eg full model approach), shrinkage</li> <li>• Incidence of outcome &amp; mortality data</li> <li>• Predictors in the model(s)</li> <li>• Performance: discrimination (AUC or C-Statistic) &amp; calibration (eg H-L P value, slope/curve), risk groups</li> <li>• Internal &amp; external validation (in same study)</li> <li>• External validation studies with relevant performance measures</li> <li>• Additional resources, funding</li> </ul> |

AKI – acute kidney injury, EPV – events per variable, H-L – Hosmer-Lemeshow goodness-of-fit test, RRT – renal replacement therapy.

eTable 6(i) Surgery

| Author, Type, TRIPOD detail               | Population, Outcome, AKI Definitions, Methods                                                                                                                                                                                                                                                                                                                                                                                                                           | Outcomes, Predictors & Model Performance                                                                                                                                                                                         | External Validation  |
|-------------------------------------------|-------------------------------------------------------------------------------------------------------------------------------------------------------------------------------------------------------------------------------------------------------------------------------------------------------------------------------------------------------------------------------------------------------------------------------------------------------------------------|----------------------------------------------------------------------------------------------------------------------------------------------------------------------------------------------------------------------------------|----------------------|
| <b>Kheterpal 2007</b>                     | USA single centre, retrospective cohort study (n=65,043). Data collected 2003-6.                                                                                                                                                                                                                                                                                                                                                                                        | Outcome (AKI) in 0.8% (n=121), 0.1% (n=14) required RRT. Propensity matched 30-day mortality with outcome 15% (n=17/118) vs. 2.7% (n=9/352) without. AKI associated with significant increase in 30-day, 60-day, 1-yr mortality. |                      |
| <b>General surgery</b>                    | Inclusion: pre-op eGFR (Cockcroft-Gault) $\geq 80$ ml/min; major surgery ( $\geq 2$ days in-patient).                                                                                                                                                                                                                                                                                                                                                                   | 7 pre-op predictors: age, emergent surgery, liver disease, BMI, high-risk surgery, PVD & COPD.                                                                                                                                   |                      |
| <b>TRIPOD 1A - Derivation</b>             | Exclusions (n=49,941): cardiac, transplant, urology & ECT, suprarenal aortic cross-clamping; pre-op AKI & IV contrast <7 days post-op, no pre-op SCr (n=6,534), pre-op eGFR <80 (n=5659). Included: n=15,102.                                                                                                                                                                                                                                                           | Weighted c-Statistic 0.77 (95% CIs 0.75-0.79). Un-weighted risk factor scale (cut-off Age >59, BMI $\geq 32$ ) c-Statistic 0.73 (0.7-0.76).                                                                                      | Xing 2012 - AUC 0.66 |
| <b>(25/37 pts)</b>                        | Outcome: reduction of eGFR to $\leq 50$ ml/min <7 days post-op.<br>Predictors: 24 pre, 6 intra-op.<br>Collinearity predictors evaluated; bivariate correlation matrix; remaining predictors entered into logistic regression full model fit. Missing data: excluded from full model. After exclusions n=14,066 included. Un-weighted model continuous predictors dichotomised.                                                                                          | With intra-op: vasopressor dose, infusion & diuretic: AUC 0.79 (0.77-0.81)<br>No calibration statistics.                                                                                                                         |                      |
| <b>Kheterpal 2009</b>                     | USA multi-centre (121) retrospective database study (n=152,244). 2005-6.                                                                                                                                                                                                                                                                                                                                                                                                | Outcome in 1% (n=762/75,952) – n=561 derivation, n=201 in validation sets.                                                                                                                                                       |                      |
| <b>General surgery</b>                    | Included n=75,952. Random split derivation 75% (n=57,080) & validation (25% n= 18,872).                                                                                                                                                                                                                                                                                                                                                                                 | Mortality 42% (n=320) in those with outcome vs 8% in a propensity matched group without outcome.                                                                                                                                 |                      |
| <b>TRIPOD 2A - Derivation, Validation</b> | Exclusions (n=76,292): vascular, cardiac, urology, ophthalmology, obstetric, or urologic procedures; day case; pre-op AKI (rapidly increasing azotaemia & SCr $\geq 265$ $\mu$ mol/L <24h of surgery) or previous RRT (n=1637).                                                                                                                                                                                                                                         | 9 predictors (simplified risk index): age $\geq 56$ yr, male, emergency, intraperitoneal surgery, diabetes, CCF, ascites, HTN, mild or moderate pre-op renal insufficiency.                                                      |                      |
| <b>(28/37 pts)</b>                        | Mild pre-op renal insufficiency defined SCr 106-168 $\mu$ mol/L; moderate >177 $\mu$ mol/L.<br>Outcome: AKI defined as increase SCr to $\geq 177$ $\mu$ mol/L or RRT <30 days.<br>Missing data: SPSS assessed impact of imputation. Continuous predictors dichotomised. Collinearity & Pearson correlations evaluated for all 19 preoperative predictors (comorbidities, drugs, type of surgery). Remaining predictors entered into full model fit logistic regression. | c-Statistic 0.80 (0.79-0.81) in derivation & internal validation cohorts.<br>Calibration: Risk classes reported for derivation vs validation sets.                                                                               |                      |

1  
2  
3  
4  
5  
6  
7  
8  
9  
10  
11  
12  
13  
14  
15  
16  
17  
18  
19  
20  
21  
22  
23  
24  
25  
26  
27  
28  
29  
30  
31  
32  
33  
34  
35  
36  
37  
38  
39  
40  
41  
42  
43  
44  
45  
46  
47  
48  
49

**eTable 6(ii)**  
**Trauma &**  
**Orthopaedics**

| Author, Type, TRIPOD detail                                                                                        | Population, Outcome, AKI Definitions, Methods                                                                                                                                                                                                                                                                                                                                                                                                                                                                                                                                                                                                                                                                                                                                                                                                                                                                                                          | Outcomes, Predictors & Model Performance                                                                                                                                                                                                                                                                                                                                                                                                                                                                                                                                                                                                                               | External Validation                       |
|--------------------------------------------------------------------------------------------------------------------|--------------------------------------------------------------------------------------------------------------------------------------------------------------------------------------------------------------------------------------------------------------------------------------------------------------------------------------------------------------------------------------------------------------------------------------------------------------------------------------------------------------------------------------------------------------------------------------------------------------------------------------------------------------------------------------------------------------------------------------------------------------------------------------------------------------------------------------------------------------------------------------------------------------------------------------------------------|------------------------------------------------------------------------------------------------------------------------------------------------------------------------------------------------------------------------------------------------------------------------------------------------------------------------------------------------------------------------------------------------------------------------------------------------------------------------------------------------------------------------------------------------------------------------------------------------------------------------------------------------------------------------|-------------------------------------------|
| <p><b>Bell 2015</b></p> <p><b>T&amp;O</b></p> <p><b>TRIPOD 3,4 - Derivation, Internal &amp; EV (34/37 pts)</b></p> | <p>UK multi-centre (3) retrospective cohort study linking multiple prospectively collected databases (n=15,218). 2005-11.</p> <p>Included: derivation n=6,220 (2 sites) &amp; validation n=4,395 (1 site).</p> <p>Exclusions: missing SCr (n=2,688), RRT, 2<sup>nd</sup> operation (n=1,915).</p> <p>Outcome: KDIGO SCr changes &lt;7 days. eGFR: CKD-EPI. Admission SCr taken as baseline.</p> <p>Entered 11 candidate predictors (age, sex, renal function, diabetes, number drugs, ACEi/ARB, NSAID/COX-2, statin, urgency, ASA grade &amp; deprivation category into Backward/forward multivariable selection. Applied a conservative selection criterion of P&lt;0.15 to limit over-fitting risk.</p> <p>Bootstrapping for IV. To assess robustness sensitivity analyses performed: multiple imputation relaxing &amp; restricting the backward selection removal criterion &amp; adding non-linear &amp; interaction terms. Categorized eGFR.</p> | <p>Outcome (AKI) in 10.8% (n=672) derivation &amp; 6.7% (n=295) validation sets. With AKI adjusted hazard ratio 1.53 (95% CI 1.38-1.70).</p> <p>7 predictors: age, male, diabetes, number drugs, eGFR, ACEi/ARBs &amp; ASA. Risk calculator supplied.</p> <p>Derivation AUC 0.74 (0.72-0.76), Internal validation 0.73.</p> <p>EV 0.70. Risk groups shown.</p> <p>Calibration plot. Calibration suboptimal in validation cohort (over-predicted risk).</p> <p>Re-calibration: correction factor, added to intercept; intercept and regression coefficient index as the only predictor used to transform prognostic index &amp; compute recalibrated probabilities.</p> | <p>Same Study different site AUC 0.70</p> |



eTable 6(iii)  
General admissions

| Author, Type, TRIPOD detail                                                                                                                       | Population, Outcome, AKI Definitions, Methods                                                                                                                                                                                                                                                                                                                                                                                                                                                                                                                                                                                                                                                                                                                                                                                                                                                                                                                                        | Outcomes, Predictors & Model Performance                                                                                                                                                                                                                                                                                                                                                                                                                                                                                           | External Validation |
|---------------------------------------------------------------------------------------------------------------------------------------------------|--------------------------------------------------------------------------------------------------------------------------------------------------------------------------------------------------------------------------------------------------------------------------------------------------------------------------------------------------------------------------------------------------------------------------------------------------------------------------------------------------------------------------------------------------------------------------------------------------------------------------------------------------------------------------------------------------------------------------------------------------------------------------------------------------------------------------------------------------------------------------------------------------------------------------------------------------------------------------------------|------------------------------------------------------------------------------------------------------------------------------------------------------------------------------------------------------------------------------------------------------------------------------------------------------------------------------------------------------------------------------------------------------------------------------------------------------------------------------------------------------------------------------------|---------------------|
| <b>Drawz 2008</b><br><br><b>Medicine, surgery, obstetrics</b><br><br><b>TRIPOD 2A - Derivation, Internal Validation</b><br><br><b>(26/37 pts)</b> | USA multi-centre (3), retrospective, case-controlled study (n=180 cases, n=360 controls). 2003.<br><br>Hospital-acquired AKI (HA-AKI) defined: increase SCr $\geq 44\mu\text{mol/L}$ if baseline SCr $\leq 168\mu\text{mol/L}$ , $\geq 88\mu\text{mol/L}$ baseline $177\text{--}433\mu\text{mol/L}$ & $\geq 133\mu\text{mol/L}$ baseline $>442\mu\text{mol/L}$ . Admission SCr presumed to be baseline.<br><br>'Control' cases - mix of same discharge diagnosis or next patient admitted to clinical team. Inclusions: age $\geq 18$ & normal admission SCr or admission SCr not qualifying as AKI vs known baseline.<br>Exclusions: RRT, no repeat SCr performed.<br><br>19 predictors assessed: demographics (age, sex, race), medical history, medications & admission observations (BP, HR, HCO <sub>3</sub> , urea, SCr, & albumin). Predictors with p value $<0.20$ univariate analysis entered into multiple logistic regression model.<br>Cases with missing data excluded. | No information on mortality.<br><br>7 predictors: age, SBP, HR, HCO <sub>3</sub> , urea, albumin & drugs (NSAIDs, ACE-I, ARBs or diuretic).<br><br>Derivation c-statistic 0.73. Simplified: HR $\geq 70/\text{min}$ , HCO <sub>3</sub> ( $<24$ or $>30\text{mmol/L}$ ), SCr $\geq 88\mu\text{mol/L}$ & drugs. c-statistic derivation 0.69. Internal validation both models - 0.66.<br><br>No H-L p-value. Risk range in validation set plotted: 0/1 risk factor = 16% risk developing HA-AKI, vs 4 risk factors = 62% risk HA-AKI. | -                   |
| <b>Matheny 2010</b><br><br><b>General admissions</b><br><br><b>TRIPOD 1B - Derivation</b><br><br><b>(28/37 pts)</b>                               | USA single centre, retrospective cohort study (n=61,179). 1999-2003.<br><br>Inclusions: adult admissions $\geq 2$ days (n=26,107).<br><br>Exclusions: missing data, baseline eGFR $<60$ (n=11,342), AKI on admission, no SCr available $<48$ hrs of admission (n=10,378) or no repeat SCr (n=13,352).<br><br>Outcome ( $<30$ days post admission): AKI Risk = $\geq 2$ SCr results $\geq 150\%$ of baseline. AKI Injury = $\geq 200\%$ baseline. eGFR using MDRD equation.<br>27 predictors assessed: coded diagnoses (including admission diagnosis) & drugs following univariate analysis placed in multivariable model. Missing values captured as a separate category.<br><br>10-fold cross-validation employed to estimate overfitting.                                                                                                                                                                                                                                         | AKI Risk 5.2% (n=1,352), AKI Injury 2.8% (n=726).<br><br>No mortality data.<br><br>27 predictors: Female, Age, Race, 11 classes of drugs, Contrast, bacterial infection (use of antibiotics), SCr, MI, rhabdomyolysis, hepatitis, pancreatitis, ammonia, AST/ALT ratio, thrombocytopenia, leucocytosis, hypercalcaemia, glucose.<br><br>AKI Risk: AUC 0.75 (0.73–0.76). H-L P = 0.29. AKI Injury: AUC 0.78 (0.76–0.79), H-L P=0.12.<br><br>Calibration plotted by deciles.                                                         | -                   |

| eTable 6(iii)<br>General admissions                                                              |                                                                                                                                                                                                                                                                                                                                                                                                                                                                                                                                                                                                                                                                                                                                                                                                                                                                                                                        |                                                                                                                                                                                                                                                                                                                                                                                                                                                                                                                                                                   |                                                                         |
|--------------------------------------------------------------------------------------------------|------------------------------------------------------------------------------------------------------------------------------------------------------------------------------------------------------------------------------------------------------------------------------------------------------------------------------------------------------------------------------------------------------------------------------------------------------------------------------------------------------------------------------------------------------------------------------------------------------------------------------------------------------------------------------------------------------------------------------------------------------------------------------------------------------------------------------------------------------------------------------------------------------------------------|-------------------------------------------------------------------------------------------------------------------------------------------------------------------------------------------------------------------------------------------------------------------------------------------------------------------------------------------------------------------------------------------------------------------------------------------------------------------------------------------------------------------------------------------------------------------|-------------------------------------------------------------------------|
| Author, Type, TRIPOD detail                                                                      | Population, Outcome, AKI Definitions, Methods                                                                                                                                                                                                                                                                                                                                                                                                                                                                                                                                                                                                                                                                                                                                                                                                                                                                          | Outcomes, Predictors & Model Performance                                                                                                                                                                                                                                                                                                                                                                                                                                                                                                                          | External Validation                                                     |
| <b>Forni 2013</b><br>General medical TRIPOD 2B, 4 – Derivation, Internal & EV (29/37 pts)        | UK single centre. Prospective cohort study (n=3,707). 2012.<br>Inclusion: medical patients staying >1 night in hospital (n=1,867).<br>Exclusions: RRT, non-medical patients, age <18, AKI on admission (n=184), missing data (n=553). Included n=3,523. Derivation n=1,867.<br>Outcome: AKI (KDIGO SCr change <7 days). Pre-admission SCr measured >1 month & <6 months. Internal validation: patients with no previous SCr result, but with a SCr on admission within normal range (defined 80-120µmol/L) (n=1,656). CKD defined - eGFR <60.<br>25 predictors on univariate, If P <0.05 variable entered into multivariable analysis. No missing data information.                                                                                                                                                                                                                                                    | Derivation group developed AKI 7% (n=95) - mortality 20% vs 3.5% (n=62) without outcome.<br>In validation cohort n=60 developed AKI.<br>7 predictors: Age 60-79 (1 point) ≥80 (3 pts), CCF, CKD, Diabetes (2 pts), Liver disease (3 pts), respiratory rate ≥20/min, <alert on AVPU score (3 pts).<br>Derivation AUC 0.72 (0.66–0.77). H-L P=0.96. Risks plotted.<br>Validation AUC 0.76 (0.71–0.82). No H-L reported.                                                                                                                                             | Hodgson 2017, AUC 0.65-0.71                                             |
| <b>Bedford 2016</b><br>General admissions TRIPOD 2A, 3 – Derivation, EV (29/37 pts)              | UK multi-centre (3), 2011. Retrospective cohort study (n=11,655).<br>Included: derivation n=7,556 admissions & internal validation n=2,514.<br>Exclusions: non-emergency, pre-admission AKI, AKI at admission, obstetrics, patients with no info on AKI at 72 hours.<br>Outcomes: AKI & AKI Stage 2/3. AKI <72 hours, using KDIGO change in SCr.<br>Ordinal logistic regression with univariable analysis for development of multivariable analysis. Backwards selection used for retention of statistically significant predictors. Missing data excluded or given own category. 3:1 random split for internal validation. External validation n=1,585, single centre.                                                                                                                                                                                                                                                | Derivation AKI 9.6% (n=241), AKI 2/3: n=40. No mortality data. EV AKI 7.6% (n=120), AKI 2/3 n=12.<br>12 predictors: age, primary diagnosis, previous hospital admissions, Charlson comorbidity index score, HbA1C, troponin, proteinuria, baseline eGFR, K <sup>+</sup> , WCC, Mg <sup>2+</sup> , CRP.<br>IV AUC 0.67 (0.64-0.71) any AKI, 0.68 for AKI 2/3. No derivation AUC<br>H-L P=0.04 any AKI model, P=0.005 for AKI 2/3.                                                                                                                                  | Same study AUC 0.71 (0.63 AKI 2/3). H-L P=0.12 AKI, P=0.14 for AKI 2/3. |
| <b>Koyner 2016</b><br>General admissions TRIPOD 2A - Derivation, Internal Validation (24/37 pts) | USA multi-centre (5) Retrospective cohort study (n=269,999). 2008-2013.<br>Included: n=202,961.<br>Exclusions: SCr >354 µmol/L on admission (n=11,305), those without SCr measurement (n=52,508) & AKI prior to arrival on ward (n=3,225).<br>Model included 29 predictors. Continuous predictors modelled using restricted cubic splines with knot placement. Variable importance plot created. Lab values & vital signs updated periodically during admission therefore separated into time intervals & logistic regression used for model estimation. Values closest to beginning of that time variable used to predict outcome for that interval, if no values available during an interval, most recent value used, if no previous value available, median value across entire cohort for that variable imputed. Split derivation (60%) and internal validation (40%) by time. Admission SCr defined as baseline. | AKI 8.6% (n=17,541). Mortality with outcome 6% (n=1031) vs 1% (n=1,419) without<br>29 predictors: SCr, Urea, HR, anion gap, Urea/SCr, RR, glucose, WCC, K <sup>+</sup> , O <sub>2</sub> Sats, age, HCO <sub>3</sub> , Na <sup>+</sup> , temperature, prior ICU, albumin, bilirubin, Ca <sup>2+</sup> , platelets, time, SBP/DBP, pulse pressure, sex, AVPU, alk phosphatase, Hb, total protein, AST<br>For AKI AUC 0.74 (0.74-0.74), AKI Stage 3 AUC 0.83 (0.83-0.84)<br>Model including only SCr, BUN & their ratio AUC 0.69 (0.68-0.69).<br>Internal validation | -                                                                       |

eTable 6(iv)  
Heart failure

| Author, Type, TRIPOD detail                        | Population, Outcome, AKI Definitions, Methods                                                                                                                                                                                   | Outcomes, Predictors & Model Performance                                                                                                                                              | External Validation    |
|----------------------------------------------------|---------------------------------------------------------------------------------------------------------------------------------------------------------------------------------------------------------------------------------|---------------------------------------------------------------------------------------------------------------------------------------------------------------------------------------|------------------------|
| <b>Forman 2004</b>                                 | USA multi-centre (11) retrospective cohort study (n=1,009). 1997-8.                                                                                                                                                             | 'WRF' 27% (271/1,004).                                                                                                                                                                | Breidhardt 2011 - 0.65 |
| <b>TRIPOD 1B - Derivation, Internal Validation</b> | Exclusion (number not given): elective, <2 days, severe aortic stenosis, anticipated transplant, RRT, LVAD, high output failure, age <20, chemotherapy. Excluded n=5 with missing charts. Included n=1004.                      | Mortality: risk ratio 7.5 with outcome (number not reported).                                                                                                                         |                        |
| <b>(26/37 pts)</b>                                 | Outcome: worsening renal function (WRF) - rise SCr >26.5µmol/l during admission.                                                                                                                                                | 4 predictors: CCF, diabetes & BP >160 mmHg (1 point), SCr 132.6-212µmol/l (2 points) & SCr >221µmol/l (3 points).                                                                     | Wang 2013 - 0.65       |
|                                                    | 29 predictors assessed: demographics, history, drugs, symptoms, signs.                                                                                                                                                          | Risk 'WRF': 0 pts = 10%, 1 = 19%, 2 = 20%, 3 = 30%, 4+ = 53%. 22% of total sample with risk score ≥4 had 53% likelihood WRF vs 10% risk among 12% with risk score 0 points (p<0.001). |                        |
|                                                    | Multivariable Cox regression models, stepwise selection. Bootstrapping for IV. Missing data: predictors missing >15% excluded; categorical data assumed "not present" & separate dummy indicator used if >5% of values missing. | <b>No AUC or Calibration statistics.</b>                                                                                                                                              |                        |
| <b>Breidhardt 2011</b>                             | Swiss multi-centre (3) prospective analysis, with derivation (Basel score) & external validation of Forman score (n=767). 2001-2, 2006-2010.                                                                                    | Outcome 21% (136/657).                                                                                                                                                                |                        |
| <b>TRIPOD 1A - Derivation, (EV Forman)</b>         | Included n=657.                                                                                                                                                                                                                 | In-hospital mortality with outcome 17% (n=23) vs 6% (n=33) without (P <0.01).                                                                                                         |                        |
| <b>(23/37 pts)</b>                                 | Exclusions (n=110): stay <2 days, incomplete SCr.                                                                                                                                                                               | 3 predictors (n=223): HCO <sub>3</sub> <21 mmol/L, Diuretics, CKD - AUC 0.71 (0.63-0.79). No H-L calibration data.                                                                    |                        |
|                                                    | Outcome: WRF = in-hospital increase SCr ≥26.5µmol/L.                                                                                                                                                                            | Scores & percentage developing outcome: 0 - 1%, 1 -35%, 2 -27%, 3 - 35%.                                                                                                              |                        |
|                                                    | eGFR - MDRD equation. CKD = eGFR <60 for >3/12 pre-admission.                                                                                                                                                                   |                                                                                                                                                                                       |                        |
|                                                    | 48 predictors assessed on univariate & those with P value <0.05 entered into multivariable analysis. No missing data information. n=223 had blood gas analysis.                                                                 |                                                                                                                                                                                       |                        |

**eTable 6(iv)**  
**Heart failure**

| Author, Type, TRIPOD detail                                                                                          | Population, Outcome, AKI Definitions, Methods                                                                                                                                                                                                                                                                                                                                                                                                                                                                                                                                                                                                                                                                                         | Outcomes, Predictors & Model Performance                                                                                                                                                                                                                                                                                                                                                                                                                                                                                                                                                                                                                                                                                                               | External Validation |
|----------------------------------------------------------------------------------------------------------------------|---------------------------------------------------------------------------------------------------------------------------------------------------------------------------------------------------------------------------------------------------------------------------------------------------------------------------------------------------------------------------------------------------------------------------------------------------------------------------------------------------------------------------------------------------------------------------------------------------------------------------------------------------------------------------------------------------------------------------------------|--------------------------------------------------------------------------------------------------------------------------------------------------------------------------------------------------------------------------------------------------------------------------------------------------------------------------------------------------------------------------------------------------------------------------------------------------------------------------------------------------------------------------------------------------------------------------------------------------------------------------------------------------------------------------------------------------------------------------------------------------------|---------------------|
| <p><b>Wang 2013</b></p> <p><b>TRIPOD 2A – Derivation, External validation (Forman)</b></p> <p><b>(30/37 pts)</b></p> | <p>China, single centre, retrospective cohort study (n=1,709). 2004-11.</p> <p>Inclusion: CCF admission diagnosed by 2 cardiologists using European Society of Cardiology guidelines.</p> <p>Exclusions: age &lt;18, stay &lt;2 days, missing data, hospital transfer, use LVAD, ESRD or RRT &amp; septic or haemorrhagic shock; cardiac op, pacemaker or cardioversion &amp; contrast.</p> <p>Split derivation (60%, n=1010) &amp; validation (40%, n=699).</p> <p>Outcome: AKI (AKIN): increase SCr <math>\geq 26.4</math> <math>\mu\text{mol/L}</math> or <math>\geq 50\%</math> in &lt;48 hrs. eGFR - MDRD.</p> <p>35 predictors – those with P value &lt;0.1 on univariate analysis placed in multivariate analysis (n=932).</p> | <p>AKI 32% (n=550). Mortality 16.5% (n=91) vs. 1.9% (n=22) without AKI (P &lt;0.01). Stay with AKI 14 vs. 11 days without (P &lt;0.01).</p> <p>8 predictors: Age <math>\geq 70</math>; <math>\geq 3</math> CCF admissions, systolic BP &lt;90mmHg, sodium &lt;130mmol/L, NYHA IV, proteinuria, SCr <math>\geq 104</math> <math>\mu\text{mol/L}</math> &amp; furosemide dose <math>\geq 80</math> mg/day.</p> <p>Derivation AUC 0.76 (0.73–0.79) H-L P=0.98. Calibration plots by deciles. Validation 0.76 (0.72-0.8), H-L P=0.13.</p> <p><math>\geq 8</math> points high risk - 55.1% incidence vs. 18% if &lt;8 points No calibration slope.</p> <p>Forman - 0.65 (0.62–0.69). vs Forman score, improvement of 0.11 AUC, (P &lt;0.001(DeLong (9))</p> | -                   |

eTable 7 – Abbreviations used in eTable 6(i-iv)

|                                                                                                                                                                                             |
|---------------------------------------------------------------------------------------------------------------------------------------------------------------------------------------------|
| ACEi – Angiotensin-converting enzyme inhibitors                                                                                                                                             |
| AKI – Acute kidney injury                                                                                                                                                                   |
| AKIN – Acute kidney injury network                                                                                                                                                          |
| ALT – Alanine transferase                                                                                                                                                                   |
| ARB – Angiotensin receptor blockers                                                                                                                                                         |
| AUC/AUROC – Area under the receiver operating characteristic curve                                                                                                                          |
| BMI – Body mass index                                                                                                                                                                       |
| CA-AKI – Community-acquired AKI                                                                                                                                                             |
| CI-AKI – Iodinated contrast AKI                                                                                                                                                             |
| CKD – Chronic kidney disease                                                                                                                                                                |
| COPD - Chronic obstructive pulmonary disease                                                                                                                                                |
| CKD-EPI – CKD Epidemiology collaborative equation                                                                                                                                           |
| COX – Cyclo-oxygenase                                                                                                                                                                       |
| D – Derivation study                                                                                                                                                                        |
| eGFR – estimated glomerular filtration rate                                                                                                                                                 |
| ESRD – end-stage renal disease                                                                                                                                                              |
| EV – External validation study                                                                                                                                                              |
| HA-AKI – Hospital-acquired AKI                                                                                                                                                              |
| HCO <sub>3</sub> – sodium bicarbonate                                                                                                                                                       |
| H-L – Hosmer-Lemeshow goodness-of-fit test (Calibration statistic)                                                                                                                          |
| HTN – Hypertension                                                                                                                                                                          |
| ICU – Intensive Care Unit                                                                                                                                                                   |
| IHD – Ischaemic heart disease                                                                                                                                                               |
| KDIGO – Kidney disease improving global outcomes                                                                                                                                            |
| LOS – length of stay                                                                                                                                                                        |
| LVAD – Left ventricular assist device                                                                                                                                                       |
| LVEF – Left ventricular ejection fraction                                                                                                                                                   |
| MAP – Mean arterial pressure                                                                                                                                                                |
| MDRD – Modification of diet in renal disease equation                                                                                                                                       |
| MI – Myocardial infarction                                                                                                                                                                  |
| Na <sup>+</sup> – sodium                                                                                                                                                                    |
| NSAID – Non-steroidal anti-inflammatory agent                                                                                                                                               |
| NYHA – New York Heart Association Classification for heart failure (I-IV)                                                                                                                   |
| PVD – Peripheral vascular disease                                                                                                                                                           |
| RIFLE – Risk, Injury, failure, loss of kidney function                                                                                                                                      |
| RRT – Renal replacement therapy                                                                                                                                                             |
| SCr – serum creatinine                                                                                                                                                                      |
| TRIPOD – Transparent Reporting of a multivariable prediction model for Individual Prognosis or Diagnosis. Checklist in derivation (37 points – 1 point for each recommended item reported). |
| <b>TRIPOD Study types</b>                                                                                                                                                                   |
| Type 1a: Development only                                                                                                                                                                   |
| Type 1b: Development and validation using resampling                                                                                                                                        |
| Type 2a: Random split-sample development and validation,                                                                                                                                    |
| Type 2b: Non-random split-sample development and validation                                                                                                                                 |
| Type 3: Development and validation using separate data                                                                                                                                      |
| Type 4: Validation only.                                                                                                                                                                    |

eTable 8 - TRIPOD items reported in the 11 studies.

| Title & Abstract             | TRIPOD Item description                                                                                                                                                                          | Reported ? |
|------------------------------|--------------------------------------------------------------------------------------------------------------------------------------------------------------------------------------------------|------------|
| Title                        | 1 Identify study as developing &/or validating a multivariable prediction model, target population & outcome.                                                                                    | 10         |
| Abstract                     | 2 Provide a summary of objectives, study design, setting, participants, sample size, predictors, outcome, statistical analysis, results & conclusions.                                           | 9          |
| <b>Introduction</b>          |                                                                                                                                                                                                  |            |
| Background & objectives      | 3a Explain medical context (including whether diagnostic or prognostic) & rationale for developing or validating the multivariable prediction model, including references to existing models.    | 11         |
|                              | 3b Specify objectives, including whether the study describes development or validation of the model or both.                                                                                     | 11         |
| <b>Methods</b>               |                                                                                                                                                                                                  |            |
| Source of data               | 4a Describe study design or source of data (e.g., randomized trial, cohort, or registry data), separately for the development & validation data sets, if applicable.                             | 11         |
|                              | 4b Specify key study dates, including start of accrual; end of accrual; & if applicable, end of follow-up.                                                                                       | 11         |
| Participants                 | 5a Specify key elements of the study setting (e.g., primary care, secondary care, general population) including number & location of centres.                                                    | 11         |
|                              | 5b Describe eligibility criteria for participants.                                                                                                                                               | 11         |
|                              | 5c Give details of treatments received, if relevant.                                                                                                                                             | 9          |
| Outcome                      | 6a Clearly define outcome predicted by the prediction model, including how & when assessed.                                                                                                      | 11         |
|                              | 6b Report any actions to blind assessment of the outcome to be predicted.                                                                                                                        | 0          |
| Predictors                   | 7a Clearly define all predictors used in developing or validating the model, including how & when they were measured.                                                                            | 11         |
|                              | 7b Report any actions to blind assessment of predictors for the outcome and other predictors.                                                                                                    | 0          |
| Sample size                  | 8 Explain how the study size was arrived at.                                                                                                                                                     | 2          |
| Missing data                 | 9 Describe how missing data were handled (e.g., complete-case analysis, single imputation, multiple imputation) with details of any imputation method.                                           | 7          |
| Statistical analysis methods | 10a Describe how predictors were handled in the analyses.                                                                                                                                        | 11         |
|                              | 10b Specify type of model, model-building procedures (including predictor selection) & method for internal validation.                                                                           | 11         |
|                              | 10c For validation, describe how the predictions were calculated.                                                                                                                                | 6          |
|                              | 10d Specify all measures used to assess model performance & if relevant, to compare multiple models.                                                                                             | 8          |
|                              | 10e Describe any model updating (e.g., recalibration) arising from the validation, if done.                                                                                                      | 1          |
| Risk groups                  | 11 Provide details on how risk groups were created, if done.                                                                                                                                     | 10         |
| Development vs. validation   | 12 For validation, identify differences from development data in setting, eligibility criteria, outcome & predictors.                                                                            | 4          |
| <b>Results</b>               |                                                                                                                                                                                                  |            |
| Participants                 | 13a Describe flow of participants through the study, including number of participants with & without the outcome & if applicable, a summary of the follow-up time. A diagram may be helpful.     | 11         |
|                              | 13b Describe characteristics of the participants (basic demographics, clinical features, available predictors), including the number of participants with missing data for predictors & outcome. | 9          |
|                              | 13c For validation, show a comparison with the development data of the distribution of important variables (demographics, predictors and outcome).                                               | 3          |
| Model development            | 14a Specify the number of participants & outcome events in each analysis.                                                                                                                        | 11         |
|                              | 14b If done, report the unadjusted association between each candidate predictor & outcome.                                                                                                       | 11         |
| Model specification          | 15a Present the full prediction model to allow predictions for individuals (i.e., all regression coefficients & model intercept or baseline survival at a given time point).                     | 8          |
|                              | 15b Explain how to use the prediction model.                                                                                                                                                     | 11         |
| Model performance            | 16 Report performance measures (with CIs) for the prediction model.                                                                                                                              | 8          |
| Model-updating               | 17 If done, report the results from any model updating (i.e., model specification, model performance).                                                                                           | 1          |
| <b>Discussion</b>            |                                                                                                                                                                                                  |            |
| Limitations                  | 18 Discuss any limitations of the study (non-representative sample, few events per predictor, missing data).                                                                                     | 11         |
| Interpretation               | 19a For validation, discuss results with reference to performance in development data & any other validation data.                                                                               | 8          |
|                              | 19b Give overall interpretation of results, considering objectives, limitations, results from similar studies & other relevant evidence.                                                         | 11         |
| Implications                 | 20 Discuss potential clinical use of the model & implications for future research.                                                                                                               | 11         |
| <b>Other information</b>     |                                                                                                                                                                                                  |            |
| Suppl info                   | 21 Provide information about availability of supplementary resources, (study protocol, Web calculator, & data sets).                                                                             | 3          |
| Funding                      | 22 Give the source of funding & role of the funders for the present study.                                                                                                                       | 9          |

1  
2  
3  
4  
5  
6  
7  
8  
9  
10  
11  
12  
13  
14  
15  
16  
17  
18  
19  
20  
21  
22  
23  
24  
25  
26  
27  
28  
29  
30  
31  
32  
33  
34  
35  
36  
37  
38  
39  
40  
41  
42  
43  
44  
45  
46  
47  
48  
49  
50  
51  
52  
53  
54  
55  
56  
57  
58  
59  
60

Red colouring highlights items reported in less than 50% of the 11 AKI prediction model studies.

For peer review only

eTable 9 – Most common predictors included in the 11 models

| Field                 | Total | General Surgery   |                   | T&O          | General       |                 |                |                 |               | Heart Failure  |                    |              |
|-----------------------|-------|-------------------|-------------------|--------------|---------------|-----------------|----------------|-----------------|---------------|----------------|--------------------|--------------|
|                       |       | Kheterpal<br>2007 | Kheterpal<br>2009 | Bell<br>2015 | Drawz<br>2008 | Matheny<br>2010 | Koyner<br>2016 | Bedford<br>2016 | Forni<br>2013 | Forman<br>2004 | Breidhardt<br>2011 | Wang<br>2013 |
| <b>Demographics</b>   |       |                   |                   |              |               |                 |                |                 |               |                |                    |              |
| Age                   | 9     | x                 | x                 | x            | x             | x               | x              | x               | x             |                |                    | x            |
| Male/gender           | 3     |                   | x                 | x            |               |                 |                |                 | x             |                |                    |              |
| <b>Past history</b>   |       |                   |                   |              |               |                 |                |                 |               |                |                    |              |
| CKD or SCr            | 10    |                   | x                 | x            | x             | x               | x              | x               | x             | x              | x                  | x            |
| Diabetes              | 5     |                   | x                 | x            |               |                 |                |                 | x             | x              |                    |              |
| Heart failure         | 4     |                   | x                 |              |               |                 |                |                 |               | x              |                    | x            |
| Liver disease         | 3     | x                 |                   |              |               |                 |                |                 | x             |                |                    |              |
| <b>Drugs</b>          |       |                   |                   |              |               |                 |                |                 |               |                |                    |              |
| Diuretics             | 4     |                   |                   |              | x             | x               |                |                 |               |                | x                  | x            |
| ACEi/ARBs             | 3     |                   |                   | x            | x             | x               |                |                 |               |                |                    |              |
| <b>Observations</b>   |       |                   |                   |              |               |                 |                |                 |               |                |                    |              |
| Hypotension/<br>Shock | 3     |                   |                   |              | x             |                 |                | x               |               |                |                    | x            |
| <b>Bloods</b>         |       |                   |                   |              |               |                 |                |                 |               |                |                    |              |
| Bicarbonate           | 4     |                   |                   |              | x             | x               | x              |                 |               |                | x                  |              |
| ↑WCC                  | 3     |                   |                   |              |               | x               | x              | x               |               |                |                    |              |

ACEi – angiotensin-converting enzyme inhibitor drugs, ARB – Angiotensin 2 receptor blocker drugs, CKD = chronic kidney disease, Bloods – laboratory parameters, SCr – serum creatinine, T&O – Trauma and Orthopaedics, WCC – white cell count.



1  
2  
3  
4  
5  
6  
7  
8  
9  
10  
11  
12  
13  
14  
15  
16  
17  
18  
19  
20  
21  
22  
23  
24  
25  
26  
27  
28  
29  
30  
31  
32  
33  
34  
35  
36  
37  
38  
39  
40  
41  
42  
43  
44  
45  
46  
47  
48  
49

eTable 10 – All predictors included in the 11 models

| Field                       | General Surgery |                | T&O       | General    |              |             |              |            | Heart Failure |                  |           | Total |
|-----------------------------|-----------------|----------------|-----------|------------|--------------|-------------|--------------|------------|---------------|------------------|-----------|-------|
|                             | Kheterpal 2007  | Kheterpal 2009 | Bell 2015 | Drawz 2008 | Matheny 2010 | Koyner 2016 | Bedford 2016 | Forni 2013 | Forman 2004   | Breidthardt 2011 | Wang 2013 |       |
| <b>Demographics</b>         |                 |                |           |            |              |             |              |            |               |                  |           |       |
| Age                         | x               | x              | x         | x          | x            | x           | x            | x          |               |                  | x         | 9     |
| Male/gender                 |                 | x              | x         |            |              | x           |              |            |               |                  |           | 3     |
| BMI                         | x               |                |           |            |              |             |              |            |               |                  |           | 1     |
| Race                        |                 |                |           |            | x            |             |              |            |               |                  |           | 1     |
| <b>Past history</b>         |                 |                |           |            |              |             |              |            |               |                  |           |       |
| CKD or SCr                  |                 | x              | x         | x          | x            | x           | x            | x          | x             | x                | x         | 10    |
| Diabetes                    |                 | x              | x         |            |              |             | x            | x          | x             |                  |           | 5     |
| Heart failure               |                 | x              |           |            |              |             |              | x          | x             |                  | x         | 4     |
| Liver disease               | x               |                |           |            | x            |             |              | x          |               |                  |           | 3     |
| Hypertension                |                 | x              |           |            |              |             |              |            |               |                  |           | 1     |
| PVD                         | x               |                |           |            |              |             |              |            |               |                  |           | 1     |
| Ascites                     |                 | x              |           |            |              |             |              |            |               |                  |           | 1     |
| COPD                        | x               |                |           |            |              |             |              |            |               |                  |           | 1     |
| Previous admissions         |                 |                |           |            |              | x (ICU)     | x            |            |               |                  |           | 2     |
| Charlson co-morbidity index |                 |                |           |            |              |             | x            |            |               |                  |           | 1     |
| ASA Grade                   |                 |                | x         |            |              |             |              |            |               |                  |           | 1     |

| Field                         | General Surgery |                | T&O       | General    |              |             |              |            | Heart Failure |                  |           | Total |
|-------------------------------|-----------------|----------------|-----------|------------|--------------|-------------|--------------|------------|---------------|------------------|-----------|-------|
|                               | Kheterpal 2007  | Kheterpal 2009 | Bell 2015 | Drawz 2008 | Matheny 2010 | Koyner 2016 | Bedford 2016 | Forni 2013 | Forman 2004   | Breidthardt 2011 | Wang 2013 |       |
| <b>Drugs</b>                  |                 |                |           |            |              |             |              |            |               |                  |           |       |
| Diuretics                     |                 |                |           | x          | x            |             |              |            |               | x                | x         | 4     |
| ACEi/ARBs                     |                 |                | x         | x          | x            |             |              |            |               |                  |           | 3     |
| NSAIDs                        |                 |                |           | x          | x            |             |              |            |               |                  |           | 2     |
| Contrast                      |                 |                |           |            | x            |             |              |            |               |                  |           | 1     |
| Number of drugs               |                 |                | x         |            |              |             |              |            |               |                  |           | 1     |
| Other drugs <sup>1</sup>      |                 |                |           |            | x            |             |              |            |               |                  |           | 1     |
| <b>Observations</b>           |                 |                |           |            |              |             |              |            |               |                  |           |       |
| Hypotension / Shock           |                 |                |           | x          |              | x           |              |            |               |                  | x         | 3     |
| Pulse pressure                |                 |                |           |            |              | x           |              |            |               |                  |           | 1     |
| Hypertension                  |                 |                |           | x          |              |             |              |            | x             |                  |           | 2     |
| Heart rate <sup>2</sup>       |                 |                |           | x          |              | x           |              |            |               |                  |           | 2     |
| Temperature                   |                 |                |           |            |              | x           |              |            |               |                  |           | 1     |
| Respiratory rate <sup>3</sup> |                 |                |           |            |              | x           |              | x          |               |                  |           | 2     |
| O2 saturations                |                 |                |           |            |              | x           |              |            |               |                  |           | 1     |
| Consciousness <sup>4</sup>    |                 |                |           |            |              | x           |              | x          |               |                  |           | 2     |
| <b>Surgery, Other</b>         |                 |                |           |            |              |             |              |            |               |                  |           |       |
| Type of surgery               | x               | x              |           |            |              |             |              |            |               |                  |           | 2     |
| Emergency                     | x               | x              |           |            |              |             |              |            |               |                  |           | 2     |
| Time                          |                 |                |           |            |              | x           |              |            |               |                  |           | 1     |

| Field                                 | General Surgery   |                   | T&O          | General       |                 |                |                 |               | Heart Failure  |                     |              | Total |
|---------------------------------------|-------------------|-------------------|--------------|---------------|-----------------|----------------|-----------------|---------------|----------------|---------------------|--------------|-------|
|                                       | Kheterpal<br>2007 | Kheterpal<br>2009 | Bell<br>2015 | Drawz<br>2008 | Matheny<br>2010 | Koyner<br>2016 | Bedford<br>2016 | Forni<br>2013 | Forman<br>2004 | Breidthardt<br>2011 | Wang<br>2013 |       |
| <b>Labs, Diagnosis</b>                |                   |                   |              |               |                 |                |                 |               |                |                     |              |       |
| Primary diagnosis                     |                   |                   |              |               |                 |                | x               |               |                |                     |              | 1     |
| Haemoglobin                           |                   |                   |              |               |                 | x              |                 |               |                |                     |              | 1     |
| ↓Platelets <sup>5</sup>               |                   |                   |              |               | x               | x              |                 |               |                |                     |              | 2     |
| CRP                                   |                   |                   |              |               |                 |                | x               |               |                |                     |              | 1     |
| ↑WCC                                  |                   |                   |              |               | x               | x              | x               |               |                |                     |              | 3     |
| Bacterial infection <sup>6</sup>      |                   |                   |              |               | x               |                |                 |               |                |                     |              | 1     |
| MI <sup>7</sup>                       |                   |                   |              |               | x               |                | x               |               |                |                     |              | 2     |
| Rhabdomyolysis <sup>8</sup>           |                   |                   |              |               | x               |                |                 |               |                |                     |              | 2     |
| Hepatitis/AST <sup>9</sup>            |                   |                   |              |               | x               | x              |                 |               |                |                     |              | 2     |
| Alk Phosphatase                       |                   |                   |              |               |                 | x              |                 |               |                |                     |              | 1     |
| Bilirubin                             |                   |                   |              |               |                 | x              |                 |               |                |                     |              | 1     |
| Pancreatitis <sup>10</sup>            |                   |                   |              |               | x               |                |                 |               |                |                     |              | 1     |
| Bicarbonate                           |                   |                   |              | x             | x               | x              |                 |               |                | x                   |              | 4     |
| Anion gap                             |                   |                   |              |               |                 | x              |                 |               |                |                     |              | 1     |
| BUN/Cr                                |                   |                   |              |               |                 | x              |                 |               |                |                     |              | 1     |
| Urea                                  |                   |                   |              | x             |                 | x              |                 |               |                |                     |              | 2     |
| ↑Ca <sup>2+</sup> /Ca <sup>2+11</sup> |                   |                   |              |               | x               | x              |                 |               |                |                     |              | 2     |
| ↑glucose                              |                   |                   |              |               | x               | x              |                 |               |                |                     |              | 2     |
| Magnesium                             |                   |                   |              |               |                 |                | x               |               |                |                     |              | 1     |
| Potassium                             |                   |                   |              |               |                 | x              | x               |               |                |                     |              | 2     |
| ↓Na <sup>+</sup> /Na <sup>+12</sup>   |                   |                   |              |               |                 | x              |                 |               |                | x                   |              | 2     |
| Albumin                               |                   |                   |              | x             |                 | x              |                 |               |                |                     |              | 2     |
| Total protein                         |                   |                   |              |               |                 | x              |                 |               |                |                     |              | 1     |
| Proteinuria                           |                   |                   |              |               |                 |                | x               |               |                |                     | x            | 2     |

1  
2  
3 ACEi – angiotensin-converting enzyme inhibitor drugs, ARB – Angiotensin 2 receptor blocker drugs,  
4 ASA grade – American Anesthesiology Association grade, CKD = chronic kidney disease, COPD –  
5 Chronic obstructive pulmonary disease, NSAIDs – non-steroidal anti-inflammatory drugs, PVD –  
6 peripheral vascular disease. <sup>1</sup>Other drugs: Aminoglycoside, Amphotericin B, Cyclosporine, Acyclovir,  
7 Cisplatin, <sup>2</sup>=  $\geq 70/\text{min}$ , <sup>3</sup>= Respiratory rate  $\geq 20/\text{min}$ , <sup>4</sup>= not alert on AVPU scale (best response: Alert, to  
8 Voice, Pain, Unresponsive), <sup>5</sup>=platelet count  $< 75\%$  lower limit of normal, <sup>6</sup>=acute use of antibiotics, <sup>7</sup>  
9 =elevated CK-MB or Troponin-I or T, <sup>8</sup>= increase CK x5 in absence of myocardial infarction, <sup>9</sup>=peak  
10 AST or ALT  $> 400\text{IU/L}$ , <sup>10</sup>= $\times 3$  lipase normal range, <sup>11</sup> Serum  $\text{Ca}^{2+}$  =>upper limit normal, Na – serum  
11 Sodium, <sup>12</sup>=serum Sodium  $< 130\text{mmol/L}$ , \*SCr. T&O – Trauma and Orthopaedics. NB Koyner et al did  
12 not specify ranges for the predictors included.  
13  
14  
15  
16  
17  
18  
19  
20  
21  
22  
23  
24  
25  
26  
27  
28  
29  
30  
31  
32  
33  
34  
35  
36  
37  
38  
39  
40  
41  
42  
43  
44  
45  
46  
47  
48  
49  
50  
51  
52  
53  
54  
55  
56  
57  
58  
59  
60

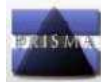

# PRISMA 2009 Checklist

| Section/topic                      | #  | Checklist item                                                                                                                                                                                                                                                                                              | Reported on page #                 |
|------------------------------------|----|-------------------------------------------------------------------------------------------------------------------------------------------------------------------------------------------------------------------------------------------------------------------------------------------------------------|------------------------------------|
| <b>TITLE</b>                       |    |                                                                                                                                                                                                                                                                                                             |                                    |
| Title                              | 1  | Identify the report as a systematic review, meta-analysis, or both.                                                                                                                                                                                                                                         | Title page                         |
| <b>ABSTRACT</b>                    |    |                                                                                                                                                                                                                                                                                                             |                                    |
| Structured summary                 | 2  | Provide a structured summary including, as applicable: background; objectives; data sources; study eligibility criteria, participants, and interventions; study appraisal and synthesis methods; results; limitations; conclusions and implications of key findings; systematic review registration number. | Page 2-3                           |
| <b>INTRODUCTION</b>                |    |                                                                                                                                                                                                                                                                                                             |                                    |
| Rationale                          | 3  | Describe the rationale for the review in the context of what is already known.                                                                                                                                                                                                                              | 5-6                                |
| Objectives                         | 4  | Provide an explicit statement of questions being addressed with reference to participants, interventions, comparisons, outcomes, and study design (PICOS).                                                                                                                                                  | 7-8                                |
| <b>METHODS</b>                     |    |                                                                                                                                                                                                                                                                                                             |                                    |
| Protocol and registration          | 5  | Indicate if a review protocol exists, if and where it can be accessed (e.g., Web address), and, if available, provide registration information including registration number.                                                                                                                               | NA                                 |
| Eligibility criteria               | 6  | Specify study characteristics (e.g., PICOS, length of follow-up) and report characteristics (e.g., years considered, language, publication status) used as criteria for eligibility, giving rationale.                                                                                                      | 8, online supplementary eTable 1   |
| Information sources                | 7  | Describe all information sources (e.g., databases with dates of coverage, contact with study authors to identify additional studies) in the search and date last searched.                                                                                                                                  | 7                                  |
| Search                             | 8  | Present full electronic search strategy for at least one database, including any limits used, such that it could be repeated.                                                                                                                                                                               | online supplementary eTable 2-4    |
| Study selection                    | 9  | State the process for selecting studies (i.e., screening, eligibility, included in systematic review, and, if applicable, included in the meta-analysis).                                                                                                                                                   | 7-8                                |
| Data collection process            | 10 | Describe method of data extraction from reports (e.g., piloted forms, independently, in duplicate) and any processes for obtaining and confirming data from investigators.                                                                                                                                  | 8-9, online supplementary eTable 5 |
| Data items                         | 11 | List and define all variables for which data were sought (e.g., PICOS, funding sources) and any assumptions and simplifications made.                                                                                                                                                                       | 8-9 online supplementary eTable    |
| Risk of bias in individual studies | 12 | Describe methods used for assessing risk of bias of individual studies (including specification of whether this was done at the study or outcome level), and how this information is to be used in any data synthesis.                                                                                      | 9                                  |
| Summary measures                   | 13 | State the principal summary measures (e.g., risk ratio, difference in means).                                                                                                                                                                                                                               | NA                                 |

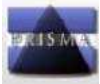

# PRISMA 2009 Checklist

1  
2  
3  
4  
5  
6  
7  
8  
9  
10  
11  
12  
13  
14  
15  
16  
17  
18  
19  
20  
21  
22  
23  
24  
25  
26  
27  
28  
29  
30  
31  
32  
33  
34  
35  
36  
37  
38  
39  
40  
41  
42  
43  
44  
45

|                      |    |                                                                                                                                                           |         |
|----------------------|----|-----------------------------------------------------------------------------------------------------------------------------------------------------------|---------|
| Synthesis of results | 14 | Describe the methods of handling data and combining results of studies, if done, including measures of consistency (e.g., $I^2$ ) for each meta-analysis. | Table 1 |
|----------------------|----|-----------------------------------------------------------------------------------------------------------------------------------------------------------|---------|

Page 1 of 2

| Section/topic                 | #  | Checklist item                                                                                                                                                                                           | Reported on page #                |
|-------------------------------|----|----------------------------------------------------------------------------------------------------------------------------------------------------------------------------------------------------------|-----------------------------------|
| Risk of bias across studies   | 15 | Specify any assessment of risk of bias that may affect the cumulative evidence (e.g., publication bias, selective reporting within studies).                                                             | online supplementary eTables 6, 8 |
| Additional analyses           | 16 | Describe methods of additional analyses (e.g., sensitivity or subgroup analyses, meta-regression), if done, indicating which were pre-specified.                                                         | NA                                |
| <b>RESULTS</b>                |    |                                                                                                                                                                                                          |                                   |
| Study selection               | 17 | Give numbers of studies screened, assessed for eligibility, and included in the review, with reasons for exclusions at each stage, ideally with a flow diagram.                                          | 10, Figure 1,                     |
| Study characteristics         | 18 | For each study, present characteristics for which data were extracted (e.g., study size, PICOS, follow-up period) and provide the citations.                                                             | supplementary eTables 6           |
| Risk of bias within studies   | 19 | Present data on risk of bias of each study and, if available, any outcome level assessment (see item 12).                                                                                                | supplementary eTables 6, 8        |
| Results of individual studies | 20 | For all outcomes considered (benefits or harms), present, for each study: (a) simple summary data for each intervention group (b) effect estimates and confidence intervals, ideally with a forest plot. | supplementary eTable 6            |
| Synthesis of results          | 21 | Present results of each meta-analysis done, including confidence intervals and measures of consistency.                                                                                                  | NA                                |
| Risk of bias across studies   | 22 | Present results of any assessment of risk of bias across studies (see Item 15).                                                                                                                          | NA                                |
| Additional analysis           | 23 | Give results of additional analyses, if done (e.g., sensitivity or subgroup analyses, meta-regression [see Item 16]).                                                                                    | NA                                |
| <b>DISCUSSION</b>             |    |                                                                                                                                                                                                          |                                   |
| Summary of evidence           | 24 | Summarize the main findings including the strength of evidence for each main outcome; consider their relevance to key groups (e.g., healthcare providers, users, and policy makers).                     | 13-15                             |
| Limitations                   | 25 | Discuss limitations at study and outcome level (e.g., risk of bias), and at review-level (e.g., incomplete retrieval of identified research, reporting bias).                                            | supplementary eTable 6, 8, pg.14  |
| Conclusions                   | 26 | Provide a general interpretation of the results in the context of other evidence, and implications for future research.                                                                                  | 15-18                             |
| <b>FUNDING</b>                |    |                                                                                                                                                                                                          |                                   |
| Funding                       | 27 | Describe sources of funding for the systematic review and other support (e.g., supply of data); role of funders for the systematic review.                                                               | NA                                |

From: Moher D, Liberati A, Tetzlaff J, Altman DG, The PRISMA Group (2009) Preferred Reporting Items for Systematic Reviews and Meta-Analyses: The PRISMA Statement. PLoS Med 6(6): e1000097.

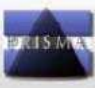

# PRISMA 2009 Checklist

1  
2  
3  
4  
5  
6  
7  
8  
9  
10  
11  
12  
13  
14  
15  
16  
17  
18  
19  
20  
21  
22  
23  
24  
25  
26  
27  
28  
29  
30  
31  
32  
33  
34  
35  
36  
37  
38  
39  
40  
41  
42  
43  
44  
45  
46  
47  
48  
49

doi:10.1371/journal.pmed1000097 For more information, visit: [www.prisma-statement.org](http://www.prisma-statement.org). Page 2 of 2

For peer review only

# BMJ Open

## A systematic review of prognostic prediction models for acute kidney injury (AKI) in general hospital populations.

|                                 |                                                                                                                                                                                                                                                                                                                                                                                                                                                                                                                                                          |
|---------------------------------|----------------------------------------------------------------------------------------------------------------------------------------------------------------------------------------------------------------------------------------------------------------------------------------------------------------------------------------------------------------------------------------------------------------------------------------------------------------------------------------------------------------------------------------------------------|
| Journal:                        | <i>BMJ Open</i>                                                                                                                                                                                                                                                                                                                                                                                                                                                                                                                                          |
| Manuscript ID                   | bmjopen-2017-016591.R1                                                                                                                                                                                                                                                                                                                                                                                                                                                                                                                                   |
| Article Type:                   | Research                                                                                                                                                                                                                                                                                                                                                                                                                                                                                                                                                 |
| Date Submitted by the Author:   | 07-Jun-2017                                                                                                                                                                                                                                                                                                                                                                                                                                                                                                                                              |
| Complete List of Authors:       | Hodgson, Luke; University of Southampton, Faculty of Medicine; Western Sussex Hospitals NHS Trust, Intensive Care<br>Sarnowski, Alexander; Royal Surrey County Hospital NHS Foundation Trust<br>Roderick, Paul; University of Southampton, Faculty of Medicine<br>Dimitrov, Borislav; University of Southampton, Primary Care and Population Sciences<br>Venn, Richard; Western Sussex Hospitals NHS Trust, Intensive Care<br>Forni, Lui; University of Surrey Faculty of Health and Medical Sciences; Royal Surrey County Hospital NHS Foundation Trust |
| <b>Primary Subject Heading</b>: | Renal medicine                                                                                                                                                                                                                                                                                                                                                                                                                                                                                                                                           |
| Secondary Subject Heading:      | Research methods                                                                                                                                                                                                                                                                                                                                                                                                                                                                                                                                         |
| Keywords:                       | Nephrology < INTERNAL MEDICINE, Acute renal failure < NEPHROLOGY, STATISTICS & RESEARCH METHODS                                                                                                                                                                                                                                                                                                                                                                                                                                                          |
|                                 |                                                                                                                                                                                                                                                                                                                                                                                                                                                                                                                                                          |

SCHOLARONE™  
Manuscripts

Only



## Title Page

### Title: A systematic review of prognostic prediction models for acute kidney injury (AKI) in general hospital populations.

**Corresponding author:** Dr Luke E Hodgson, Academic Unit of Primary Care and Population Sciences, Faculty of Medicine, University of Southampton, Southampton General Hospital, Tremona Road, Southampton, SO16 6YD.

Email: [drhodgson@gmail.com](mailto:drhodgson@gmail.com) Telephone: +44 7734883040

#### Authors:

Luke E Hodgson,<sup>1,2</sup> Intensive Care Registrar,

Alexander Sarnowski<sup>3</sup>, Core Medical Trainee,

Paul J Roderick<sup>1</sup>, Professor of Public Health,

Borislav D Dimitrov<sup>1</sup>, Associate Professor Medical Statistics<sup>†</sup>,

Richard M Venn<sup>2</sup>, Consultant Intensivist and,

Lui G Forni<sup>3,4</sup>, Professor of Intensive Care Medicine.

1. Academic Unit of Primary Care and Population Sciences, Faculty of Medicine, University of Southampton, Southampton General Hospital, Tremona Road, Southampton, SO16 6YD, UK.
2. Western Sussex Hospitals NHS Foundation Trust, Anaesthetics Department, Worthing Hospital, Lyndhurst Rd, Worthing, BN11 2DH, UK.
3. The Royal Surrey County Hospital NHS Foundation Trust, Egerton Road, Guildford, GU2 7XX, UK.
4. Faculty of Health and Medical Sciences, University of Surrey, Guildford, Surrey, GU2 7XH, UK.

<sup>†</sup> Deceased 15<sup>th</sup> January 2017.

Word count main text: 3717

## Abstract

**Objective** Critically appraise prediction models for hospital-acquired AKI (HA-AKI) in general populations.

**Design** Systematic review.

**Data sources** Medline, EMBASE & Web of Science until November 2016.

**Eligibility** Studies describing development of a multivariable model for predicting HA-AKI in non-specialised adult hospital populations. Published guidance followed for data extraction reporting and appraisal.

**Results** 14046 references were screened. Of 53 HA-AKI prediction models, 11 met inclusion criteria (general medicine and/or surgery populations, 474478 patient episodes), five externally validated. The most common predictors were age (n=9 models), diabetes (5), admission serum creatinine (SCr) (5), chronic kidney disease (CKD) (4), drugs (diuretics, 4 and/or Angiotensin-converting enzyme inhibitors/Angiotensin-receptor blockers, 3), bicarbonate and heart failure (4 models each). Heterogeneity was identified for outcome definition. Deficiencies in reporting included handling of predictors, missing data and sample size. Admission SCr was frequently taken to represent baseline renal function. Most models were considered at high risk of bias. Area under the receiver operating characteristic curves to predict HA-AKI ranged 0.71-0.80 in derivation (reported in 8/11 studies), 0.66-0.80 for internal validation studies (n=7) and 0.65-0.71 in 5 external validations. For calibration the Hosmer-Lemeshow test or a calibration plot were provided in 4/11 derivations, 3/11 internal and 3/5 external validations. A minority of the models allow easy bedside calculation and potential electronic automation. No impact analysis studies were found.

1  
2  
3 **Conclusions** AKI prediction models may help address shortcomings in risk  
4 assessment, however, in general hospital populations few have external  
5 validation. Similar predictors reflect an elderly demographic with chronic co-  
6 morbidity. Reporting deficiencies mirror prediction research more broadly,  
7 with handling of SCr (baseline function and use as a predictor) a concern.  
8 Future research should focus on validation, exploration of electronic linkage  
9 and impact analysis. The later could combine a prediction model with AKI  
10 alerting to address prevention and early recognition of evolving AKI.  
11  
12  
13  
14  
15  
16  
17  
18  
19  
20  
21  
22  
23

24 **Key words: acute kidney injury, clinical prediction models, systematic**  
25 **review**  
26  
27  
28  
29  
30  
31  
32  
33  
34  
35  
36  
37  
38  
39  
40  
41  
42  
43  
44  
45  
46  
47  
48  
49  
50  
51  
52  
53  
54  
55  
56  
57  
58  
59  
60

## Summary

### Strengths

- This is the first systematic review of prediction models for hospital-acquired AKI (HA-AKI) in general hospital populations who account for the majority of hospital admissions and AKI cases.
- The models were selected following an extensive literature search; the review followed the latest critical appraisal guidance and assessed validity of the models in terms of risk of bias and applicability, highlighting important shortcomings such as handling of serum creatinine.
- The large number of patient episodes provides important insights into AKI prediction and complements other recent reviews in specialised areas (cardiac surgery, CI-AKI and liver transplantation).

### Weaknesses

- Lack of access to individual participant data (IPD) prevented a meta-analysis of the studies, an avenue of future research.
- The small number of externally validated models and absence of impact analysis limits recommendation and implementation of an individual model.

## Introduction

Acute kidney injury (AKI) is defined as an acute increase in serum creatinine (SCr) or reduction in urine volume.[1] The incidence of AKI is increasing, affecting up to one in five hospitalised adults worldwide.[2] A continuum of injury exists long before sufficient loss of excretory kidney function can be measured with standard laboratory tests (i.e. SCr).[3 4] Associated mortality remains high, in part reflecting the severity of the underlying disease, but may also be due to the limitations of conventional markers to detect early injury.[5]

Deficits in recognition and management of patients with AKI,[6] has led to practice guidance calling for improved risk assessment, at which point interventions could be most beneficial.[7] One suggested strategy to achieve this aim is through the implementation of clinical prediction models.[8 9] Though development and validation of AKI prediction models is desirable,[7 10] clinical application in this and other fields has been hampered for a number of reasons:

- Potential predictors and models continuously increase with new studies often finding conflicting results,[11]
- Substandard reporting of methodology and results make conclusions problematic,[12 13]
- Few general hospital population studies exist - specialist fields (cardiac and transplant surgery and contrast-induced [CI-AKI]) account for the majority of AKI models and all systematic reviews, but are unlikely to be generalisable and,[14-17]
- Models rarely enable electronic automation as part of clinical workflow, known to influence uptake.[18]

1  
2  
3  
4  
5 High quality systematic reviews of prediction models have been called for.[19]  
6  
7 Following recent reporting guidance (Checklist for critical Appraisal and data  
8 extraction for systematic Reviews of prediction Modelling Studies,  
9 CHARMS[20] and Transparent reporting of a multivariable prediction model  
10 for individual prognosis or diagnosis, TRIPOD),[12] this review appraises  
11 hospital-acquired AKI (HA-AKI) prediction models in general populations, who  
12 in the UK account for the majority of hospital episodes,[21] and AKI cases.[22  
13  
14  
15  
16  
17  
18  
19  
20  
21  
22  
23  
24  
25  
26  
27  
28  
29  
30  
31  
32  
33  
34  
35  
36  
37  
38  
39  
40  
41  
42  
43  
44  
45  
46  
47  
48  
49  
50  
51  
52  
53  
54  
55  
56  
57  
58  
59  
60

## Methods

Published guidance (CHARMS, TRIPOD and Preferred reporting items for systematic reviews and meta-analyses, PRISMA) helped frame the review question, data extraction, reporting and appraisal.[12 20 24] The research question was: what are the available prognostic prediction models for the development of HA-AKI in adult general populations? Using explicit, systematic methods to minimise bias and provide reliable findings from which conclusions can be drawn and decisions made,[25 26] the review aimed to collate empirical evidence for AKI prediction models across general hospital settings, fitting pre-specified eligibility criteria (online supplementary file eTable 1). Performance was assessed by discrimination and calibration including validation studies. The presence of any impact analysis studies was also investigated. The review aimed to provide recommendations for the most robust, usable models, including the ability to incorporate future electronic data linkage, for example between the community (primary care) and hospital.

### Data sources, study selection and data extraction

We searched MEDLINE, Embase & Web of Science databases (inception to November 2016) using recommended filters (online supplementary file eTables 2-4).[27 28] Titles and abstracts were screened by two reviewers (LH, AS) and full articles reviewed if eligible. Disagreements were resolved by iterative screening rounds. Reference lists from retrieved articles, systematic reviews, National[7] and International guidance[1] and our own literature files were also analysed. Data extraction, and quality assessment was performed by two investigators (LH, AS) with disagreements resolved by a third reviewer

1  
2  
3 (LF). A data extraction form was used based on previous reviews and  
4  
5 guidance (summary online supplementary file eTable 5).[12 13 20] Items  
6  
7 extracted included design (eg, cohort, case-control), population, location,  
8  
9 outcome (definition duration of follow-up, blinding of assessment), modelling  
10  
11 method (eg, logistic), method of internal validation (eg, bootstrapping),  
12  
13 number of participants and events, number and type of predictors, model  
14  
15 presentation, and predictive performance (calibration, discrimination). The  
16  
17 presence of external validation was recorded.  
18  
19

### 20 21 22 23 24 25 **Outcome, model performance and clinical utility**

26 It was anticipated that study outcome, HA-AKI, would vary given the  
27  
28 numerous definitions in use prior to KDIGO in 2012.[1] Thus, during the  
29  
30 search strategy we included studies with a SCr around admission and  
31  
32 repeated during a hospital admission to diagnose HA-AKI. Information was  
33  
34 gathered on how a study defined a patients baseline renal function, how  
35  
36 community AKI cases were handled, whether SCr was used as a predictor in  
37  
38 analysis and finally the magnitude and timeframe used to define the outcome.  
39  
40 Discrimination and calibration are the most common methods to assess  
41  
42 model performance. Discrimination is usually assessed graphically by the  
43  
44 area under the receiver operating characteristic curve (AUROC), representing  
45  
46 how well a model separates and ranks patients who experienced the  
47  
48 outcome, from those who did not. For prediction models, the AUROC, which  
49  
50 focuses solely on accuracy has a number of shortcomings, such as a lack of  
51  
52 information on consequences and when used in populations where the  
53  
54 outcome prevalence is rare.[29 30] Calibration describes how well predicted  
55  
56  
57  
58  
59  
60



1  
2  
3 results agree with observed results.[12 30] The Hosmer-Lemeshow (H-L) test,  
4  
5 despite limitations, is the most commonly used calibration statistic.[31 32] It is  
6  
7 also recommended to graphically plot expected and actual outcomes, for  
8  
9 example, with a calibration slope.[12] In addition to performance, ease of  
10  
11 bedside use and whether the models could be electronically automated -  
12  
13 factors known to influence successful uptake - were recorded.[18] A  
14  
15 quantitative synthesis of the models was not performed, being beyond the  
16  
17 scope of review and formal methods for meta-analysis of prediction models  
18  
19 are yet to be fully developed.  
20  
21  
22  
23  
24

### 25 **Study quality assessment**

26  
27 A global TRIPOD score for each study was calculated to quantify reporting,  
28  
29 consisting of the sum of the scores for each individual item (out of a maximum  
30  
31 37, with a score of 1 for criterion met, score of 0 for each item not met, or  
32  
33 unclear).[12] As yet there has been no suggested cut-off for what represents a  
34  
35 high quality study, though it would be reasonable to judge that those studies  
36  
37 with the most significant gaps in reporting are likely to be at higher risk of bias.  
38  
39 Furthermore the quality (risk of bias) of each study was assessed by piloting a  
40  
41 version of PROBAST (Prediction study Risk Of Bias Assessment Tool), a tool  
42  
43 for assessing risk of bias and applicability of prognostic model studies,  
44  
45 nearing completion and ready for piloting when this review was undertaken  
46  
47 (Wolff R, Whiting P, Mallett S, et al, personal communication, website:  
48  
49 <http://s371539711.initial-website.co.uk/probast/>). Elements were considered in  
50  
51  
52  
53  
54 the following domains: study participants, predictors, outcome, sample size  
55  
56  
57  
58  
59  
60

1  
2  
3 and missing data, statistical analysis and overall judgement of bias and  
4  
5 applicability.  
6  
7

### 8 9 **Patient involvement**

10 Patients were not involved in setting the research question, outcome, design  
11  
12 and implementation of the study. There are no plans to involve patients in  
13  
14 dissemination.  
15  
16  
17  
18  
19  
20  
21  
22  
23  
24  
25  
26  
27  
28  
29  
30  
31  
32  
33  
34  
35  
36  
37  
38  
39  
40  
41  
42  
43  
44  
45  
46  
47  
48  
49  
50  
51  
52  
53  
54  
55  
56  
57  
58  
59  
60

## Results

From 14046 articles identified by the search strategy, 254 full articles were reviewed (PRISMA flow chart, figure 1). Specialised fields (predominantly cardiac surgery, transplantation or CI-AKI) accounted for 61 of 74 (82%) of all studies. This review included eleven general model studies (n=474478 patient episodes), in General Surgery,[33 34] Trauma and Orthopaedics (T&O),[35] General Hospital cohorts (predominantly Medicine and Surgery),[36-40] and Heart Failure (summarised in table 1 and online supplementary file eTable 6, with abbreviations in eTable 7).[41-43] Two further studies were purely external validations.[44 45] HA-AKI incidence was 7% (21641 events), though this varied from <1% in the General Surgery models,[33 34] to 28% across the Heart Failure studies and heterogeneous definitions (timeframe and marker) were employed (see table 1 for definitions used with further information in eTable 6). For example, five studies took admission SCr to represent a patients baseline, potentially confusing CKD, established and emerging AKI.[34 38 40 42 43] Of note one study produced a model to predict admission AKI as well as HA-AKI at 72 hours with the former not considered suitable for analysis in this review.[39]

In seven of the nine studies reporting age, this was significantly higher in the group with the outcome, with eight studies reporting a mean or median age over 65 years in the outcome group (table 1). Mortality was significantly higher in those who developed the outcome in the six studies where data were available (ranging 6-42%). No impact analyses were retrieved.

## Study reporting

1  
2  
3 A median 28 (interquartile range 25-30) of 37 recommended items were  
4 reported, suggesting significant shortcomings (key shortcomings are  
5 summarised in table 2 with TRIPOD reporting summarised in online  
6 supplementary file eTable 8). By design, eight studies were retrospective, two  
7 prospective and one was a case control. Five studies were single-centre. The  
8 USA (n=6) and UK (n=3) accounted for the majority of the models. Only three  
9 studies used imputation techniques for missing data.[34 35 38] Definitions  
10 were heterogenous (table 1) with five using RIFLE,[37] AKIN,[42] or KDIGO  
11 criteria for changes in SCr.[35 36 39] One study used KDIGO SCr change  
12 within a 24-hour timeframe of predictors being measured.[40]

### 26 27 **Candidate predictors, model building and sample size**

28  
29 A median of 29 (interquartile range 19-35) predictors were considered, though  
30 frequently studies only reported those significant on univariate or multivariate  
31 analysis. Blinding of assessment of predictors and study outcome was not  
32 mentioned. Continuous predictors were dichotomized in four studies and ten  
33 studies used univariate analysis to select for multivariate analysis. No models  
34 mentioned shrinkage techniques or sample size calculations. Median number  
35 of outcome events was 271 (121-672). For statistical power, all of the studies  
36 had more than ten events per predictor (EPP) *included in the model*. However  
37 the EPP was <10 in six studies, when accounting for the total number of  
38 candidate predictors assessed.[33 36 38 39 41 43] Of a total of 56 different  
39 predictors a median of 7 (7-12) were included per model, including  
40 demographics, past history, procedure information, laboratory parameters,  
41 physiological observations and hospital admission diagnoses (most common  
42  
43  
44  
45  
46  
47  
48  
49  
50  
51  
52  
53  
54  
55  
56  
57  
58  
59  
60

1  
2  
3 presented in figure 2, full details online eTables 9-10). Only 4 studies included  
4  
5 physiological parameters in their final model.[36 38 40 43] Seven studies  
6  
7 included admission SCr as potential predictor with five including this in the  
8  
9 final model, thus potentially confusing prediction with a diagnosis of AKI.[34  
10  
11 37 40 42 43] Each study's handling of SCr in terms of when a baseline was  
12  
13 calculated (prior or at admission) and whether SCr was used as a predictor  
14  
15 are summarised in eTable 11.  
16  
17  
18  
19

### 20 21 **Model performance (table 1)**

22  
23 Median AUROC (or C-Statistic) was 0.745 (range 0.71-0.80) for derivation  
24  
25 (eight studies) and 0.74 (range 0.66-0.80) for internal validations reporting  
26  
27 discrimination (seven studies). Excluding the studies using non-consensus  
28  
29 based definitions and those including admission SCr as predictor and/or  
30  
31 baseline, left only four studies.[35 36 39 41] In these studies AUROCs ranged  
32  
33 0.71-0.74 in derivation (three studies), 0.67-0.76 for internal validation (three  
34  
35 studies) and 0.65-0.71 for external validation (three studies). Only one model  
36  
37 study presented a calibration plot for derivation and validation.[35] The H-L  
38  
39 statistic was used in three derivations,[36 37 42] and two internal  
40  
41 validations.[39 42]  
42  
43  
44  
45  
46

47  
48 Five models have been externally validated: on separate populations within  
49  
50 the same study;[35 39] other model studies;[43] or stand alone external  
51  
52 validations,[33 45] where the AUROCs were moderate, ranging 0.65-0.71.  
53  
54 One validation provided a calibration plot,[35] one the H-L statistic,[39] and  
55  
56 one reported both.[45] In the Bell external validation cohort calibration  
57  
58  
59  
60

1  
2  
3 suggested the model over-predicted the outcome requiring recalibration.[35]  
4  
5 In the external validation of the Forni study calibration plots showed  
6  
7 agreement at low probability rates whilst at higher rates calibration deviated in  
8  
9 the medical cohort.[45] Two of the three surgical models have been externally  
10  
11 validated: the Kheterpal model,[33] in a Chinese population (AUROC  
12  
13 0.66),[44] and the UK T&O study used a third centre for external  
14  
15 validation.[35] Two of five mixed general population models have external  
16  
17 validation,[36-39] the later having been derived on medical patients and  
18  
19 externally validated in medical and surgical cohorts.[45] The first of the three  
20  
21 heart failure studies was externally validated in the subsequent studies with  
22  
23 inferior discrimination (AUROC 0.65 in both validations).[41-43] No model  
24  
25 updating was reported.  
26  
27  
28  
29  
30  
31  
32

### 33 **Quality assessment and risk of bias summary**

34  
35 Quality assessment based on a draft version of the PROBAST tool. This  
36  
37 suggested evidence in 9 of the 11 included studies of a high risk of bias  
38  
39 (summarized in table 3) with shortcomings across the major domains of the  
40  
41 assessment. For example, one study used a case-control design which is  
42  
43 inappropriate for developing a prediction model as it does not enable  
44  
45 calculation of absolute risks and thus yields incorrect estimates of model  
46  
47 intercept or baseline hazard.[20] A wide variety of predictors were considered  
48  
49 with use of univariate analysis to select for multivariate in 10/11 of the studies.  
50  
51 Six studies were potentially underpowered having less than ten EPP  
52  
53 assessed. Seven of the studies introduced potential bias in handling of renal  
54  
55 function and SCr either in failing to establish a reliable baseline renal function,  
56  
57  
58  
59  
60

1  
2  
3  
4  
5  
6  
7  
8  
9  
10  
11  
12  
13  
14  
15  
16  
17  
18  
19  
20  
21  
22  
23  
24  
25  
26  
27  
28  
29  
30  
31  
32  
33  
34  
35  
36  
37  
38  
39  
40  
41  
42  
43  
44  
45  
46  
47  
48  
49  
50  
51  
52  
53  
54  
55  
56  
57  
58  
59  
60

excluding patients with reduced renal function, or employing it as a predictor.  
Finally, outcome definition frequently varied in part owing to a number of the  
studies preceding consensus definitions.

For peer review only

## Discussion

### Principal findings

In this first systematic review of HA-AKI prediction in general hospital settings, the most common predictors were age, diabetes, CKD, drugs, heart failure and serum creatinine and bicarbonate. Modest discrimination performance of all the models is unsurprising when attempting at a single time point to predict a future event reflecting diverse aetiologies, affecting heterogeneous patient groups. Significant shortcomings mirror those described elsewhere:[13 46-48]

- Multiple similar models, rarely externally validated,
- No impact analysis or evidence of clinical implementation,
- Incomplete reporting and,
- Little consideration of electronic automation (allowing presentation without additional data input beyond usual clinical care), which influences uptake.[18]

Methodological and reporting shortcomings in the studies (summarised in table 2) included 6 studies having less than 10 EPP potentially leading to overfitting, with only 3 employing multiple imputation to handle missing data which can increase sample size and power.[12 49 50]

Handling of SCr and CKD was of particular concern in a number of areas.

First, in part due to a previous lack of a consensus definition, the outcome in question, HA-AKI, had heterogeneous definitions, both in magnitude of SCr rise and time-frame. For example, the Kheterpal study (2009)[34] used a rise in SCr  $\geq 177 \mu\text{mol/L}$  which has been shown to significantly underestimate



1  
2  
3 rates of AKI when compared with more recent definitions.[51] Koyner et al  
4 used a rolling timeframe of 24 hours whilst others used SCr elevation at any  
5 point during an admission.[40] Indeed one study produced a separate model  
6 to predict AKI at admission to hospital.[39] This was further confused by  
7 seven studies inclusion of admission SCr as a potential predictor, (with  
8 inclusion in five models), five studies taking admission SCr to represent a  
9 patient's baseline and two studies excluding all patients with a reduced  
10 admission eGFR from their analysis. This risks confusing prediction and  
11 detection of AKI events. Issues with differing definitions have been described  
12 before in systematic reviews of prediction models and should be considered  
13 when researchers embark on future studies.[52 53]  
14  
15  
16  
17  
18  
19  
20  
21  
22  
23  
24  
25  
26  
27  
28  
29  
30

31 A formal risk of bias assessment (PROBAST) suggested the majority of  
32 studies had domains placing the studies at high risk of bias. Published after  
33 TRIPOD, Bell and colleagues' model provides researchers with a good  
34 template for adherence to reporting guidance, with a low risk of bias and  
35 demonstrates the utility of data linkage (for example between community and  
36 hospital), though lack of validation in other populations tempers  
37 recommendation for implementation.[35]  
38  
39  
40  
41  
42  
43  
44  
45  
46  
47  
48  
49  
50

### 51 **Strengths and limitations of this review**

52

53 This review summarises the currently available AKI prediction models in  
54 general populations who account for the majority of hospital admissions and  
55 AKI cases.[21-23] The models were selected following an extensive literature  
56  
57  
58  
59  
60

1  
2  
3 search and the review employed the most recent critical appraisal guidance  
4 and risk of bias assessment.[12 20] The large number of patient episodes  
5 provides important insights into AKI prediction complementing other recent  
6 reviews in cardiac surgery, CI-AKI, liver transplantation and non-cardiac  
7 surgery.[14-17] In-patient mortality in those who developed the outcome  
8 ranged 6-42% (in the six studies reporting mortality) emphasising this is a  
9 crucial group to promptly identify.  
10  
11  
12  
13  
14  
15  
16  
17  
18  
19  
20  
21  
22

23 The first limitation is the small number of externally validated models, which  
24 tempers recommending one model over another. Second, though we aimed to  
25 include general populations, caution should be employed, for example, when  
26 comparing a model derived on Heart Failure patients to one from an  
27 Orthopaedic cohort. However, in many UK hospitals, such populations share  
28 similarities (predominantly elderly demographic with co-morbidities) and if one  
29 aim of a prediction model is generalizability, a model should be tested in these  
30 different fields. Third, as study outcome definitions and handling of SCr  
31 (baseline and as predictor of outcome) were heterogenous, model  
32 comparisons are problematic, though recent studies were more likely to use  
33 KDIGO SCr change. Fourth, no studies included urine output, probably  
34 reflecting the small number of patients who have this marker closely  
35 monitored. Fifth, TRIPOD recommendations were used as a reporting  
36 benchmark, however, the relative importance of individual items and what  
37 constitutes an acceptable 'score' is arguable, though a formal risk of bias  
38 assessment was also carried (PROBAST) providing further insight into  
39  
40  
41  
42  
43  
44  
45  
46  
47  
48  
49  
50  
51  
52  
53  
54  
55  
56  
57  
58  
59  
60

1  
2  
3 respective study strengths and weaknesses. The absence of impact analysis  
4  
5 limits the recommendation of one model over another. Finally, a meta-  
6  
7 analysis was not performed without access to individual participant data (IPD).  
8  
9 Expert guidance now exists in this area and offers opportunities to improve  
10  
11 the scope of external validation research.[53 54]  
12  
13

### 14 15 16 17 18 **Comparison with previous systematic reviews** 19

20  
21 Both this study and a review of CI-AKI models found pre-existing predictors -  
22  
23 age, CKD, diabetes and heart failure to be the most commonly included.[15] A  
24  
25 Cardiac surgery review reported specialty specific predictors in addition to  
26  
27 these chronic co-morbidities. A non-Cardiac surgery review (5 of 6 studies in  
28  
29 liver transplantation or resection) reported age, CKD and diabetes in at least  
30  
31 two models.[17] Finally, a liver transplantation review highlighted the  
32  
33 importance of CKD and (unsurprisingly) liver dysfunction.[16] The present  
34  
35 review found drugs or acute laboratory values frequently included, though  
36  
37 only 5 models included acute physiological parameters. Our study and the  
38  
39 non-Cardiac surgery review included adherence to recommended TRIPOD  
40  
41 reporting with similar shortcomings. Across the other reviews, only in the  
42  
43 fields of CI-AKI and Cardiac surgery were external validations reported.[14 15]  
44  
45 Ease of use (including if necessary a calculator) and potential for electronic  
46  
47 automation were rarely considered across the models reviewed. No impact  
48  
49 analysis studies have been described.  
50  
51  
52  
53  
54  
55  
56  
57  
58  
59  
60

## Future directions

Management of HA-AKI presents a significant challenge, that could be helped by robust prediction models to risk stratify, encourage prevention and prompt recognition, key healthcare priorities.[6 10] Appraisal and synthesis of prediction studies may enable clinicians and policymakers judge model utility however, this is problematic when key study details are not reported.[12] Though much of the AKI literature is on (often assumed) hospital-acquired AKI, the majority of cases arise from the community (CA-AKI).[55 56] Indeed, a recent study demonstrated a significant proportion of such patients are never hospitalised.[57] This review suggests even in HA-AKI, the strongest predictors are pre-existing patient factors. The two laboratory measures frequently included – serum creatinine and bicarbonate – may also reflect a chronic component. It is likely a proportion of cases classed as HA-AKI represent (evolving) community cases, thus, models using such pre-existing risk factors makes clinical sense. This continuum of harm between community and hospital could suggest that a risk prediction model in place at, or even *before* hospital admission, combined with early flagging of those who have met AKI criteria, may be required to improve outcomes.

Electronic linkage of patient records between community and hospital data is desirable to ensure accurate inclusion of predictors (chronic morbidity, medication, laboratory and physiological parameters). This may also enable bedside automation as part of clinical workflow, where there is evidence beneficial implementation can be achieved.[18 58] Acute physiological

1  
2  
3 parameters assessed as predictors in seven studies and subsequently  
4  
5 included in only five studies, could be an avenue of future research to improve  
6  
7 the modest performance of all models at a single time point (admission to  
8  
9 hospital) described to date. As hospitals increasingly employ electronic track  
10  
11 and trigger observation systems this may then enable the application of  
12  
13 complex statistics (e.g. machine learning) to account for the effects of trends  
14  
15 and repeated measures. Risk stratification using chronic comorbidity and  
16  
17 medication(s) with trends in physiology, could be further enhanced by  
18  
19 measurement of urine output and/or newer biomarkers. Unfortunately, to date  
20  
21 such research has not been published, with reliance on using retrospective  
22  
23 databases often only providing information at a single time point. A future  
24  
25 study in this area would thus require prospective collection of rich data, with  
26  
27 the aim to achieve accurate prediction modeling demanded by clinicians and  
28  
29 patients prior to implementation.  
30  
31  
32  
33  
34  
35  
36  
37

38 Impact analysis in prediction research is sparse making it difficult to conclude  
39  
40 whether a model is worth implementing alongside, or replacing, usual  
41  
42 care.[59] This is important as for example, one study suggested clinical  
43  
44 acumen may be superior to prediction models,[60] whilst another found the  
45  
46 combination of a model with clinical acumen was better than either alone.[61]  
47  
48 Some impact analyses have suggested benefit, but conclusions are limited  
49  
50 due to their rarity and design (mostly before-after without control).[62] There  
51  
52 are a number of potential areas for impact analysis and clinical  
53  
54 implementation (summarised in table 4). First, in specific populations a model  
55  
56 could influence location of peri-operative care of surgical patients or drug  
57  
58  
59  
60

1  
2  
3 and/or contrast dosing in patients with heart failure. Second, in a wider  
4  
5 hospital setting the effects of highlighting those at highest risk to teams (ward,  
6  
7 outreach critical care or Nephrology) with an adequate effector arm could be  
8  
9 investigated. This has been demonstrated by existing AKI alerts in *established*  
10  
11 AKI where outcome benefit has been limited to patients who had best practice  
12  
13 delivered.[63-65] Third, as healthcare embraces complex technology, the  
14  
15 inclusion of physiological (including urine output) or laboratory trends may be  
16  
17 the only way to significantly improve model performance. Fourth, a model  
18  
19 could identify a high risk group to be further risk stratified by employing one of  
20  
21 the (increasing number of) available renal biomarkers,[66] or response to an  
22  
23 intervention such as a frusemide stress test.[67] Finally, one external  
24  
25 validation study found those patients high risk on the prediction model who did  
26  
27 develop AKI had a higher rate of mortality than the low risk group who  
28  
29 developed HA-AKI, indicating the model predicts disease severity.[45] This  
30  
31 could allow early review of such patients to help inform whether escalation of  
32  
33 care may be required, or indeed be appropriate in the increasing number of  
34  
35 frail elderly patients admitted to hospitals.  
36  
37  
38  
39  
40  
41  
42  
43  
44

45 To conclude, improving the management of patients to prevent AKI, or reduce  
46  
47 associated complications, is a global health priority. This systematic review  
48  
49 suggests there are few externally validated prediction models to help identify  
50  
51 those at risk of AKI across general hospital populations. Future research  
52  
53 should concentrate on validation, utility of additional markers, exploration of  
54  
55 electronic implementation to enable clinical uptake and impact analysis.  
56  
57  
58  
59  
60

1  
2  
3  
4  
5  
6  
7  
8  
9  
10  
11  
12  
13  
14  
15  
16  
17  
18  
19  
20  
21  
22  
23  
24  
25  
26  
27  
28  
29  
30  
31  
32  
33  
34  
35  
36  
37  
38  
39  
40  
41  
42  
43  
44  
45  
46  
47  
48  
49  
50  
51  
52  
53  
54  
55  
56  
57  
58  
59  
60

For peer review only

**Table 1** Summary of HA-AKI prediction models.

| Population                    | General Surgery           |                               | T&O                 | General (Medical & Surgical) |                         |                         |                        |                       | Heart failure         |                          |                     |
|-------------------------------|---------------------------|-------------------------------|---------------------|------------------------------|-------------------------|-------------------------|------------------------|-----------------------|-----------------------|--------------------------|---------------------|
| Author, year (n-derivation)   | Kheterpal 2007 (n=14,066) | Kheterpal 2009 (n=57,080)     | Bell 2015 (n=6,220) | Drawz 2008 (n=360)           | Matheny 2010 (n=26,107) | Koyner 2016 (n=202,961) | Bedford 2016 (n=7,556) | Forni 2013 (n=1,867)  | Forman 2004 (n=1,004) | Breidthardt 2011 (n=657) | Wang 2013 (n=1,010) |
| Centres, Design               | 1, R                      | 121, R                        | 3, R                | 3, CC                        | 1, R                    | 5, R                    | 3, R                   | 1, P                  | 11, R                 | 1, P                     | 1, R                |
| Age (with outcome)            | 59                        | 65 (±15)                      | 77 (±11)            | 67                           | -                       | 70 (±16)                | -                      | 80 (70-86)            | 68.7                  | 79 (72-85)               | 73 (67-78)          |
| Age (no outcome)              | 47                        | 54 (±17)                      | 70 (±16)            | 63                           | -                       | 63 (±19)                | -                      | 73 (61-81)            | 66.8                  | 79 (70-85)               | 71 (63-75)          |
| Outcome predicted             | eGFR <50 (<7 days)        | ↑SCr ≥177µmol/l, RRT (30 day) | KDIGO ↑SCr          | ↑SCr*                        | RIFLE ↑SCr              | KDIGO ↑SCr (24hr)       | KDIGO ↑SCr (72hr)      | KDIGO ↑SCr (<7 days)  | ↑SCr >26.5µmol/l**    | ↑SCr >26.5µmol/l**       | AKIN SCr (<48hr)    |
| Events                        | 121                       | 561                           | 672                 | 120                          | 1,352                   | 17,541                  | 222                    | 95                    | 271                   | 136                      | 341                 |
| Mortality with outcome        | 15%                       | 42%                           | -                   | -                            | -                       | 6%                      | -                      | 20%                   | 27%                   | 17%                      | 17%                 |
| Mortality no outcome          | 3%^                       | 8%^                           | -                   | -                            | -                       | 1%                      | -                      | 4%                    | -                     | 6%                       | 2%                  |
| Predictors tested             | 30                        | 19                            | 11                  | 19                           | 23                      | 29                      | 45                     | 25                    | 29                    | 48                       | 35                  |
| Predictors included           | 7                         | 9                             | 7                   | 7                            | 27                      | 29                      | 12                     | 7                     | 4                     | 3                        | 8                   |
| EPP                           | 4                         | 30                            | 61                  | 6                            | 59                      | 605                     | 5                      | 4                     | 9                     | 3                        | 10                  |
| Inappropriate handling of SCr | X                         | X                             |                     | X                            | X                       | X                       |                        |                       | X                     | X                        | X                   |
| Derivation AUROC              | 0.77                      | 0.80                          | 0.74                | 0.73                         | 0.75                    | -                       | -                      | 0.72                  | -                     | 0.71                     | 0.76                |
| IV AUROC                      | -                         | 0.80                          | 0.73                | 0.66                         | -                       | 0.74                    | 0.67                   | 0.76                  | -                     | -                        | 0.76                |
| EV AUROC                      | 0.67                      | X                             | 0.71                | X                            | X                       | X                       | 0.71                   | 0.65-0.71#            | 0.65, 0.65            | X                        | X                   |
| Derivation Calibration        | RR                        | RR                            | Plot                | -                            | H-L P=0.29              | -                       | -                      | H-L P=0.96            | -                     | -                        | H-L P=0.98          |
| IV Calibration                | -                         | RR                            | Plot                | RR                           | -                       | -                       | H-L P=0.04             | -                     | -                     | -                        | H-L P=0.13          |
| EV Calibration                | RR                        | -                             | Plot                | -                            | -                       | -                       | H-L P=0.12             | H-L P=0.06-0.09, Plot | RR                    | -                        | -                   |



1  
2  
3  
4  
5  
6  
7  
8  
9  
10  
11  
12  
13  
14  
15  
16  
17  
18  
19  
20  
21  
22  
23  
24  
25  
26  
27  
28  
29  
30  
31  
32  
33  
34  
35  
36  
37  
38  
39  
40  
41  
42  
43  
44  
45  
46  
47  
48  
49

|                              |    |    |        |     |    |     |    |     |     |     |     |
|------------------------------|----|----|--------|-----|----|-----|----|-----|-----|-----|-----|
| <b>TRIPOD items reported</b> | 25 | 28 | 34     | 26  | 28 | 24  | 29 | 29  | 26  | 23  | 30  |
| <b>Bedside calculation</b>   | -  | -  | -      | -   | -  | -   | -  | Yes | Yes | Yes | Yes |
| <b>Electronic Automation</b> | -  | -  | Yes*** | Yes | -  | Yes | -  | Yes | Yes | Yes | Yes |

Design: R - retrospective, P – prospective, CC – case-control, Mortality - In-hospital. AUROC – area under the receiver operating characteristic curve, Plot – Calibration plot, EPP – Events per predictor, EV – external validation, H-L – Hosmer-Lemeshow test, IV – internal validation, RR – risk range, RRT – renal replacement therapy, SCr – serum creatinine, T&O – Trauma & Orthopaedics, TRIPOD – how many of the 37 recommended items were reported. \*Increase sCr ≥44µmol/L if baseline SCr of ≤168µmol/L, ≥88µmol/L baseline 177-433µmol/L & ≥133µmol/L baseline >442µmol/L. \*\*During admission, \*\*\*Used linked community and hospital data, ^Propensity matched, # validations in medicine/surgery with/without baseline SCr.

Peer review only

**Table 2** Summary of limitations in methodology and reporting

| Area of concern                                | Description                                                                                                                                                                                                                                                                                                                          |
|------------------------------------------------|--------------------------------------------------------------------------------------------------------------------------------------------------------------------------------------------------------------------------------------------------------------------------------------------------------------------------------------|
| Missing data                                   | Multiple imputation recommended to avoid bias, rarely described.[12 50]                                                                                                                                                                                                                                                              |
| Definitions of outcome & predictors            | No consistent strategy used to differentiate CA-AKI from HA-AKI. Two studies excluded patients with pre-existing CKD;[33 37] five studies took admission SCr as baseline; five included SCr as predictor despite it forming the outcome; co-morbidities inconsistently defined: including from admission diagnoses or coded history. |
| Blinding of predictors or outcome              | Not reported.                                                                                                                                                                                                                                                                                                                        |
| Sample size                                    | Calculations not described, six studies had <10 EPP. Small sample increases risk of overfitting and underfitting.[12 49]                                                                                                                                                                                                             |
| Univariate to select for multivariate analysis | Technique not recommended, used in 10 of 11 models.[12]                                                                                                                                                                                                                                                                              |
| Bootstrapping                                  | Adjust for optimism, without losing information - rarely described.[35 43]                                                                                                                                                                                                                                                           |
| Calibration plots                              | Important part of model performance,[12] present in only one model & one external validation.[35 45]                                                                                                                                                                                                                                 |
| External validation & model updating           | Validation adjusts for optimism, assesses generalizability, but was scarce, whilst model updating is recommended but not described.[12]                                                                                                                                                                                              |
| Newer performance measures                     | Techniques such as decision curve analysis offer insight into clinical consequences - not described.[29]                                                                                                                                                                                                                             |
| Use of data linkage                            | Only one study utilised data linkage.[35]                                                                                                                                                                                                                                                                                            |

CA-AKI – community-acquired AKI, CKD – chronic kidney disease, EPP – events per predictor, HA-AKI – hospital-acquired AKI, SCr – serum Creatinine.

1  
2  
3  
4  
5  
6  
7  
8  
9  
10  
11  
12  
13  
14  
15  
16  
17  
18  
19  
20  
21  
22  
23  
24  
25  
26  
27  
28  
29  
30  
31  
32  
33  
34  
35  
36  
37  
38  
39  
40  
41  
42  
43  
44  
45  
46  
47  
48  
49

**Table 3. Risk of bias summary based on PROBAST (Prediction study Risk Of Bias Assessment Tool, PROBAST, permission from Wolff R, personal communication).**

| Population                         | General Surgery  |                  | T&O         | General (Medical & Surgical) |                |               |                |              | Heart failure |                   |             |
|------------------------------------|------------------|------------------|-------------|------------------------------|----------------|---------------|----------------|--------------|---------------|-------------------|-------------|
| Model, year                        | Kheterpal (2007) | Kheterpal (2009) | Bell (2015) | Drawz (2008)                 | Matheny (2010) | Koynar (2016) | Bedford (2016) | Forni (2013) | Forman (2004) | Breidhardt (2011) | Wang (2013) |
| Study participants                 | ?                | ?                | +           | +                            | +              | ?             | +              | +            | ?             | ?                 | ?           |
| Predictors                         | ?                | ?                | ?           | ?                            | -              | ?             | -              | +            | -             | -                 | ?           |
| Outcome                            | -                | -                | +           | -                            | -              | -             | +              | +            | -             | -                 | -           |
| Sample size & missing data         | -                | +                | +           | -                            | -              | ?             | ?              | ?            | -             | -                 | ?           |
| Statistical analysis               | -                | -                | +           | -                            | +              | -             | -              | ?            | -             | -                 | -           |
| <b>Overall judgement of bias</b>   | -                | -                | +           | -                            | -              | -             | -              | +            | -             | -                 | -           |
| Overall judgement of applicability | -                | -                | ?           | -                            | -              | -             | +              | +            | -             | -                 | -           |
| Usability of the model             | +                | +                | +           | +                            | +              | +             | +              | +            | +             | +                 | +           |

view only

1  
2  
3  
4  
5  
6  
7 Study participants domain - design of the included study, and inclusion and exclusion of its participants; Predictors domain - definition, timing, and  
8 measurement of predictors (also assesses whether predictors have not been measured and were therefore omitted from the model); Outcome domain -  
9 definition, timing, and measurement of predicted outcomes; Sample size and missing data domain - number of participants in the study and exclusions owing  
10 to missing data; Statistical analysis domain - methods (eg appropriate presentation of discrimination and calibration). Red = "high", Green = "low" or Amber =  
11 "unclear" risk of bias.  
12  
13  
14  
15  
16  
17  
18  
19  
20  
21  
22  
23  
24  
25  
26  
27  
28  
29  
30  
31  
32  
33  
34  
35  
36  
37  
38  
39  
40  
41  
42  
43  
44  
45  
46  
47  
48  
49

For peer review only

**Table 4.** Potential areas for future Impact analysis of AKI prediction models

| Population            | Impact analysis to inform Clinical use                                                                                                                     |
|-----------------------|------------------------------------------------------------------------------------------------------------------------------------------------------------|
| General Surgery       | Peri-operative: haemodynamic targets, place of care, drugs, contrast delivery                                                                              |
| Trauma & Orthopaedics |                                                                                                                                                            |
| General Populations   | Risk stratification of large populations: eg influencing intensity of observations, remote monitoring, application of biomarkers in subgroups at high-risk |
| Heart failure         | Optimise haemodynamic status: diuretic dosing, use/volume of contrast                                                                                      |

### Legends to Figures

**Figure 1** – PRISMA study flow chart

**Figure 2** – Predictors most frequently included in the 11 HA-AKI prediction models. ACEi – Angiotensin-converting enzyme inhibitors, ARBs – Angiotensin-receptor blockers, Bloods – laboratory parameters, CKD – chronic kidney disease, ↓HCO<sub>3</sub> – reduced serum bicarbonate, SCr – serum creatinine, ↑WCC - raised white cell count.

### Competing interests statement

*“All authors have completed the Unified Competing Interest form at [www.icmje.org/coi\\_disclosure.pdf](http://www.icmje.org/coi_disclosure.pdf) and declare that all have no relationships with companies that might have an interest in the submitted work in the previous 3 years; their spouses, partners, or children have no financial relationships that may be relevant to the submitted work; and have no non-financial interests that may be relevant to the submitted work.”*

1  
2  
3 All authors had full access to all of the data (including statistical reports and  
4 tables) in the study and take responsibility for the integrity of the data and the  
5 accuracy of the data analysis. The lead author affirms that the manuscript is  
6 an honest, accurate, and transparent account of the study being reported and  
7 no important aspects of the study have been omitted.  
8  
9  
10  
11  
12

13  
14  
15  
16 **Contributors:** LH, LF, RV BDD and PR developed the idea for the study. LH,  
17 AS, LF, BDD and PR were involved in the study conception, preliminary  
18 literature review and design of the search strategy and the study protocol. LH,  
19 AS and LF were involved in screening and data extraction of papers. All  
20 authors reviewed data extraction output. LH drafted the manuscript, which  
21 was critically reviewed and approved by all authors.  
22  
23  
24  
25  
26  
27  
28  
29  
30  
31

32 **Funding:** This research received no specific grant from any funding agency in  
33 the public, commercial or not-for-profit sectors.  
34  
35  
36  
37  
38  
39  
40  
41  
42  
43  
44  
45  
46  
47  
48  
49  
50  
51  
52  
53  
54  
55  
56  
57  
58  
59  
60

## References

1. KDIGO Clinical Practice Guideline for Acute Kidney Injury. *Kidney Int* 2012;**Suppl 2**(1):1-136 doi: 10.1038/kisup.2012.6published Online First: Epub Date]].
2. Susantitaphong P, Cruz DN, Cerda J, et al. World incidence of AKI: a meta-analysis. *Clin J Am Soc Nephrol* 2013;**8**(9):1482-93 doi: 10.2215/cjn.00710113published Online First: Epub Date]].
3. Bellomo R, Kellum JA, Ronco C. Acute kidney injury. *Lancet* 2012;**380**(9843):756-66 doi: 10.1016/s0140-6736(11)61454-2published Online First: Epub Date]].
4. Bellomo R, Kellum J, Ronco C. Acute renal failure: time for consensus. *Intensive Care Med* 2001;**27**(11):1685-8 doi: 10.1007/s00134-001-1120-6published Online First: Epub Date]].
5. Bagshaw SM, Gibney RT. Conventional markers of kidney function. *Crit Care Med* 2008;**36**(4 Suppl):S152-8 doi: 10.1097/CCM.0b013e318168c613published Online First: Epub Date]].
6. National Confidential Enquiry into Patient Outcome and Death. Adding insult to injury: a review of the care of patients who died in hospital with a primary diagnosis of acute kidney injury (acute renal failure) [http://www.ncepod.org.uk/2009report1/Downloads/AKI\\_report.pdf](http://www.ncepod.org.uk/2009report1/Downloads/AKI_report.pdf): NCEPOD, 2009.
7. *National Institute for Health and Care Excellence. Acute Kidney Injury: Prevention, Detection and Management Up to the Point of Renal Replacement Therapy. (Clinical guideline CG169)*. London: National Clinical Guideline Centre., 2013.
8. Rabar S, Lau R, O'Flynn N, Li L, Barry P. Risk assessment of fragility fractures: summary of NICE guidance. *BMJ* 2012;**345**:e3698 doi: 10.1136/bmj.e3698published Online First: Epub Date]].
9. Goff DC, Jr., Lloyd-Jones DM, Bennett G, et al. 2013 ACC/AHA guideline on the assessment of cardiovascular risk: a report of the American College of Cardiology/American Heart Association Task Force on Practice Guidelines. *Circulation* 2014;**129**(25 Suppl 2):S49-73 doi: 10.1161/01.cir.0000437741.48606.98published Online First: Epub Date]].
10. Mehta RL, Cerda J, Burdmann EA, et al. International Society of Nephrology's 0by25 initiative for acute kidney injury (zero preventable deaths by 2025): a human rights case for nephrology. *The Lancet* doi: 10.1016/S0140-6736(15)60126-Xpublished Online First: Epub Date]].
11. Kyzas PA, Denaxa-Kyza D, Ioannidis JP. Almost all articles on cancer prognostic markers report statistically significant results. *Eur J Cancer* 2007;**43**(17):2559-79 doi: 10.1016/j.ejca.2007.08.030published Online First: Epub Date]].
12. Moons KG, Altman DG, Reitsma JB, et al. Transparent Reporting of a multivariable prediction model for Individual Prognosis or Diagnosis (TRIPOD): explanation and elaboration. *Ann Intern Med* 2015;**162**(1):W1-73 doi: 10.7326/M14-0698published Online First: Epub Date]].
13. Bouwmeester W, Zuithoff NP, Mallett S, et al. Reporting and methods in clinical prediction research: a systematic review. *PLoS Med* 2012;**9**(5):1-

- 12 doi: 10.1371/journal.pmed.1001221published Online First: Epub Date]].
14. Huen SC, Parikh CR. Predicting acute kidney injury after cardiac surgery: a systematic review. *Ann Thorac Surg* 2012;**93**(1):337-47 doi: 10.1016/j.athoracsur.2011.09.010published Online First: Epub Date]].
15. Silver SA, Shah PM, Chertow GM, Harel S, Wald R, Harel Z. Risk prediction models for contrast induced nephropathy: systematic review. *BMJ* 2015;**351**:h4395 doi: 10.1136/bmj.h4395published Online First: Epub Date]].
16. Caragata R, Wyssusek KH, Kruger P. Acute kidney injury following liver transplantation: a systematic review of published predictive models. *Anaesth Intensive Care* 2016;**44**(2):251-61
17. Wilson T, Quan S, Cheema K, et al. Risk prediction models for acute kidney injury following major noncardiac surgery: systematic review. *Nephrol Dial Transplant* 2016;**31**(2):231-40 doi: 10.1093/ndt/gfv415published Online First: Epub Date]].
18. Kawamoto K, Houlihan CA, Balas EA, Lobach DF. Improving clinical practice using clinical decision support systems: a systematic review of trials to identify features critical to success. *BMJ* 2005;**330**(7494):765 doi: 10.1136/bmj.38398.500764.8Fpublished Online First: Epub Date]].
19. Altman DG. Systematic reviews of evaluations of prognostic variables. *BMJ* 2001;**323**(7306):224-8
20. Moons KG, de Groot JA, Bouwmeester W, et al. Critical appraisal and data extraction for systematic reviews of prediction modelling studies: the CHARMS checklist. *PLoS Med* 2014;**11**(10):e1001744 doi: 10.1371/journal.pmed.1001744published Online First: Epub Date]].
21. Hospital Episode Statistics Analysis HaSCIC. Hospital Episode Statistics: Admitted patient care - 2014-15. <http://www.hscic.gov.uk/pubs/hes1415>: Health and Social Care Information Centre, 2015.
22. Selby NM, Crowley L, Fluck RJ, et al. Use of electronic results reporting to diagnose and monitor AKI in hospitalized patients. *Clin J Am Soc Nephrol* 2012;**7**(4):533-40 doi: 10.2215/cjn.08970911published Online First: Epub Date]].
23. Porter CJ, Juurlink I, Bisset LH, Bavakunji R, Mehta RL, Devonald MA. A real-time electronic alert to improve detection of acute kidney injury in a large teaching hospital. *Nephrol Dial Transplant* 2014;**29**(10):1888-93 doi: 10.1093/ndt/gfu082published Online First: Epub Date]].
24. Moher D, Liberati A, Tetzlaff J, Altman DG. Preferred reporting items for systematic reviews and meta-analyses: the PRISMA statement. *PLoS Med* 2009;**6**(7):e1000097 doi: 10.1371/journal.pmed.1000097published Online First: Epub Date]].
25. Antman EM, Lau J, Kupelnick B, Mosteller F, Chalmers TC. A comparison of results of meta-analyses of randomized control trials and recommendations of clinical experts. *Treatments for myocardial infarction. JAMA* 1992;**268**(2):240-8
26. Oxman AD, Guyatt GH. The science of reviewing research. *Ann N Y Acad Sci* 1993;**703**:125-33; discussion 33-4



- 1  
2  
3 27. Geersing GJ, Bouwmeester W, Zuithoff P, Spijker R, Leeftang M, Moons KG.  
4 Search filters for finding prognostic and diagnostic prediction studies in  
5 Medline to enhance systematic reviews. PLoS One 2012;**7**(2):e32844 doi:  
6 10.1371/journal.pone.0032844published Online First: Epub Date]].
- 7  
8 28. Wilczynski NL, McKibbin KA, Walter SD, Garg AX, Haynes RB. MEDLINE  
9 clinical queries are robust when searching in recent publishing years. J  
10 Am Med Inform Assoc 2013;**20**(2):363-8 doi: 10.1136/amiajnl-2012-  
11 001075published Online First: Epub Date]].
- 12 29. Vickers AJ, Elkin EB. Decision curve analysis: a novel method for evaluating  
13 prediction models. Med Decis Making 2006;**26**(6):565-74 doi:  
14 10.1177/0272989x06295361published Online First: Epub Date]].
- 15 30. Cook NR. Use and misuse of the receiver operating characteristic curve in  
16 risk prediction. Circulation 2007;**115**(7):928-35 doi:  
17 10.1161/circulationaha.106.672402published Online First: Epub Date]].
- 18 31. Hosmer DW, Hjort NL. Goodness-of-fit processes for logistic regression:  
19 simulation results. Stat Med 2002;**21**(18):2723-38 doi:  
20 10.1002/sim.1200published Online First: Epub Date]].
- 21 32. Kramer AA, Zimmerman JE. Assessing the calibration of mortality  
22 benchmarks in critical care: The Hosmer-Lemeshow test revisited. Crit  
23 Care Med 2007;**35**(9):2052-6 doi:  
24 10.1097/01.ccm.0000275267.64078.b0published Online First: Epub  
25 Date]].
- 26 33. Kheterpal S, Tremper KK, Englesbe MJ, et al. Predictors of postoperative  
27 acute renal failure after noncardiac surgery in patients with previously  
28 normal renal function. Anesthesiology 2007;**107**(6):892-902 doi:  
29 10.1097/01.anes.0000290588.29668.38published Online First: Epub  
30 Date]].
- 31 34. Kheterpal S, Tremper KK, Heung M, et al. Development and validation of an  
32 acute kidney injury risk index for patients undergoing general surgery:  
33 results from a national data set. Anesthesiology 2009;**110**(3):505-15 doi:  
34 10.1097/ALN.0b013e3181979440published Online First: Epub Date]].
- 35 35. Bell S, Dekker FW, Vadeloo T, et al. Risk of postoperative acute kidney  
36 injury in patients undergoing orthopaedic surgery-development and  
37 validation of a risk score and effect of acute kidney injury on survival:  
38 observational cohort study. BMJ 2015;**351**:h5639 doi:  
39 10.1136/bmj.h5639published Online First: Epub Date]].
- 40 36. Forni LG, Dawes T, Sinclair H, et al. Identifying the patient at risk of acute  
41 kidney injury: a predictive scoring system for the development of acute  
42 kidney injury in acute medical patients. Nephron Clin Pract 2013;**123**(3-  
43 4):143-50 doi: 10.1159/000351509published Online First: Epub Date]].
- 44 37. Matheny ME, Miller RA, Ikizler TA, et al. Development of inpatient risk  
45 stratification models of acute kidney injury for use in electronic health  
46 records. Med Decis Making 2010;**30**(6):639-50 doi:  
47 10.1177/0272989X10364246published Online First: Epub Date]].
- 48 38. Drawz PE, Miller RT, Sehgal AR. Predicting hospital-acquired acute kidney  
49 injury--a case-controlled study. Ren Fail 2008;**30**(9):848-55 doi:  
50 10.1080/08860220802356515published Online First: Epub Date]].
- 51 39. Bedford M, Stevens P, Coulton S, et al. *Development of risk models for the*  
52 *prediction of new or worsening acute kidney injury on or during hospital*  
53  
54  
55  
56  
57  
58  
59  
60

- admission: a cohort and nested study. Southampton UK: Queen's Printer and Controller of HMSO., 2016.
40. Koyner JL, Adhikari R, Edelson DP, Churpek MM. Development of a Multicenter Ward-Based AKI Prediction Model. *Clin J Am Soc Nephrol* 2016;**11**(11):1935-43 doi: 10.2215/cjn.00280116published Online First: Epub Date]].
  41. Breidthardt T, Socrates T, Noveanu M, et al. Effect and clinical prediction of worsening renal function in acute decompensated heart failure. *Am J Cardiol* 2011;**107**(5):730-5 doi: 10.1016/j.amjcard.2010.10.056published Online First: Epub Date]].
  42. Wang YN, Cheng H, Yue T, Chen YP. Derivation and validation of a prediction score for acute kidney injury in patients hospitalized with acute heart failure in a Chinese cohort. *Nephrology (Carlton)* 2013;**18**(7):489-96 doi: 10.1111/nep.12092published Online First: Epub Date]].
  43. Forman DE, Butler J, Wang Y, et al. Incidence, predictors at admission, and impact of worsening renal function among patients hospitalized with heart failure. *J Am Coll Cardiol* 2004;**43**(1):61-7
  44. Xing XZ, Wang HJ, Huang CL, et al. Two acute kidney injury risk scores for critically ill cancer patients undergoing non-cardiac surgery. *World J Emerg Med* 2012;**3**(4):278-81 doi: 10.5847/wjem.j.1920-8642.2012.04.007published Online First: Epub Date]].
  45. Hodgson L, Dimitrov, BD, Roderick, PJ, Venn, R, LG, Forni. Predicting AKI in Emergency Admissions: An external validation study of the acute kidney injury prediction score (APS). *Bmj Open* 2017;**In Press**
  46. Noble D, Mathur R, Dent T, Meads C, Greenhalgh T. Risk models and scores for type 2 diabetes: systematic review. *BMJ* 2011;**343**:d7163 doi: 10.1136/bmj.d7163published Online First: Epub Date]].
  47. Collins GS, Mallett S, Omar O, Yu LM. Developing risk prediction models for type 2 diabetes: a systematic review of methodology and reporting. *BMC Med* 2011;**9**:103 doi: 10.1186/1741-7015-9-103published Online First: Epub Date]].
  48. Mallett S, Royston P, Dutton S, Waters R, Altman DG. Reporting methods in studies developing prognostic models in cancer: a review. *BMC Med* 2010;**8**:20 doi: 10.1186/1741-7015-8-20published Online First: Epub Date]].
  49. Peduzzi P, Concato J, Feinstein AR, Holford TR. Importance of events per independent variable in proportional hazards regression analysis. II. Accuracy and precision of regression estimates. *J Clin Epidemiol* 1995;**48**(12):1503-10
  50. Donders AR, van der Heijden GJ, Stijnen T, Moons KG. Review: a gentle introduction to imputation of missing values. *J Clin Epidemiol* 2006;**59**(10):1087-91 doi: 10.1016/j.jclinepi.2006.01.014published Online First: Epub Date]].
  51. Bihorac A, Brennan M, Baslanti TO, et al. NATIONAL SURGICAL QUALITY IMPROVEMENT PROGRAM UNDERESTIMATES THE RISK ASSOCIATED WITH MILD AND MODERATE POSTOPERATIVE ACUTE KIDNEY INJURY. *Critical care medicine* 2013;**41**(11):10.1097/CCM.0b013e31829860fc doi: 10.1097/CCM.0b013e31829860fcpublished Online First: Epub Date]].

- 1  
2  
3 52. Ensor J, Riley RD, Moore D, Snell KI, Bayliss S, Fitzmaurice D. Systematic  
4 review of prognostic models for recurrent venous thromboembolism  
5 (VTE) post-treatment of first unprovoked VTE. *BMJ Open*  
6 2016;**6**(5):e011190 doi: 10.1136/bmjopen-2016-011190published  
7 Online First: Epub Date]].  
8  
9 53. Debray TPA, Damen JAAG, Snell KIE, et al. A guide to systematic review and  
10 meta-analysis of prediction model performance. *BMJ* 2017;**356** doi:  
11 10.1136/bmj.i6460published Online First: Epub Date]].  
12 54. Riley RD, Ensor J, Snell KIE, et al. External validation of clinical prediction  
13 models using big datasets from e-health records or IPD meta-analysis:  
14 opportunities and challenges. *BMJ* 2016;**353** doi:  
15 10.1136/bmj.i3140published Online First: Epub Date]].  
16  
17 55. Wonnacott A, Meran S, Amphlett B, Talabani B, Phillips A. Epidemiology and  
18 outcomes in community-acquired versus hospital-acquired AKI. *Clin J Am*  
19 *Soc Nephrol* 2014;**9**(6):1007-14 doi: 10.2215/cjn.07920713published  
20 Online First: Epub Date]].  
21 56. Xu X, Nie S, Liu Z, et al. Epidemiology and Clinical Correlates of AKI in Chinese  
22 Hospitalized Adults. *Clin J Am Soc Nephrol* 2015;**10**(9):1510-8 doi:  
23 10.2215/cjn.02140215published Online First: Epub Date]].  
24 57. Sawhney S, Fluck N, Fraser SD, et al. KDIGO-based acute kidney injury criteria  
25 operate differently in hospitals and the community-findings from a large  
26 population cohort. *Nephrol Dial Transplant* 2016;**31**(6):922-9 doi:  
27 10.1093/ndt/gfw052published Online First: Epub Date]].  
28  
29 58. Kannry J, McCullagh L, Kushniruk A, Mann D, Edonyabo D, McGinn T. A  
30 Framework for Usable and Effective Clinical Decision Support: Experience  
31 from the iCPR Randomized Clinical Trial. *EGEMS (Wash DC)*  
32 2015;**3**(2):1150 doi: 10.13063/2327-9214.1150published Online First:  
33 Epub Date]].  
34 59. Toll DB, Janssen KJ, Vergouwe Y, Moons KG. Validation, updating and impact  
35 of clinical prediction rules: a review. *J Clin Epidemiol* 2008;**61**(11):1085-  
36 94 doi: 10.1016/j.jclinepi.2008.04.008published Online First: Epub  
37 Date]].  
38  
39 60. Sinuff T, Adhikari NK, Cook DJ, et al. Mortality predictions in the intensive  
40 care unit: comparing physicians with scoring systems. *Crit Care Med*  
41 2006;**34**(3):878-85 doi:  
42 10.1097/01.ccm.0000201881.58644.41published Online First: Epub  
43 Date]].  
44  
45 61. Brabrand M, Hallas J, Knudsen T. Nurses and physicians in a medical  
46 admission unit can accurately predict mortality of acutely admitted  
47 patients: a prospective cohort study. *PLoS One* 2014;**9**(7):e101739 doi:  
48 10.1371/journal.pone.0101739published Online First: Epub Date]].  
49 62. Fillmore CL, Bray BE, Kawamoto K. Systematic review of clinical decision  
50 support interventions with potential for inpatient cost reduction. *BMC*  
51 *Med Inform Decis Mak* 2013;**13**:135 doi: 10.1186/1472-6947-13-  
52 135published Online First: Epub Date]].  
53  
54 63. Wilson FP, Shashaty M, Testani J, et al. Automated, electronic alerts for acute  
55 kidney injury: a single-blind, parallel-group, randomised controlled trial.  
56 *Lancet* 2015 doi: 10.1016/s0140-6736(15)60266-5published Online  
57 First: Epub Date]].  
58  
59  
60

- 1  
2  
3 64. Kolhe NV, Reilly T, Leung J, et al. A simple care bundle for use in acute kidney  
4 injury: a propensity score-matched cohort study. *Nephrol Dial Transplant*  
5 2016;**31**(11):1846-54 doi: 10.1093/ndt/gfw087published Online First:  
6 Epub Date]].  
7  
8 65. Kolhe NV, Staples D, Reilly T, et al. Impact of Compliance with a Care Bundle  
9 on Acute Kidney Injury Outcomes: A Prospective Observational Study.  
10 *PLoS One* 2015;**10**(7):e0132279 doi:  
11 10.1371/journal.pone.0132279published Online First: Epub Date]].  
12  
13 66. Murray PT, Mehta RL, Shaw A, et al. Current Use of Biomarkers in Acute  
14 Kidney Injury: Report and Summary of Recommendations from the 10(th)  
15 Acute Dialysis Quality Initiative Consensus Conference. *Kidney*  
16 *international* 2014;**85**(3):513-21 doi: 10.1038/ki.2013.374published  
17 Online First: Epub Date]].  
18  
19 67. Koyner JL, Davison DL, Brasha-Mitchell E, et al. Furosemide Stress Test and  
20 Biomarkers for the Prediction of AKI Severity. *J Am Soc Nephrol*  
21 2015;**26**(8):2023-31 doi: 10.1681/asn.2014060535published Online  
22 First: Epub Date]].  
23  
24  
25  
26  
27  
28  
29  
30  
31  
32  
33  
34  
35  
36  
37  
38  
39  
40  
41  
42  
43  
44  
45  
46  
47  
48  
49  
50  
51  
52  
53  
54  
55  
56  
57  
58  
59  
60

1  
2  
3  
4  
5  
6  
7  
8  
9  
10  
11  
12  
13  
14  
15  
16  
17  
18  
19  
20  
21  
22  
23  
24  
25  
26  
27  
28  
29  
30  
31  
32  
33  
34  
35  
36  
37  
38  
39  
40  
41  
42  
43  
44  
45  
46  
47  
48  
49  
50  
51  
52  
53  
54  
55  
56  
57  
58  
59  
60

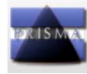

**PRISMA 2009 Flow Diagram**

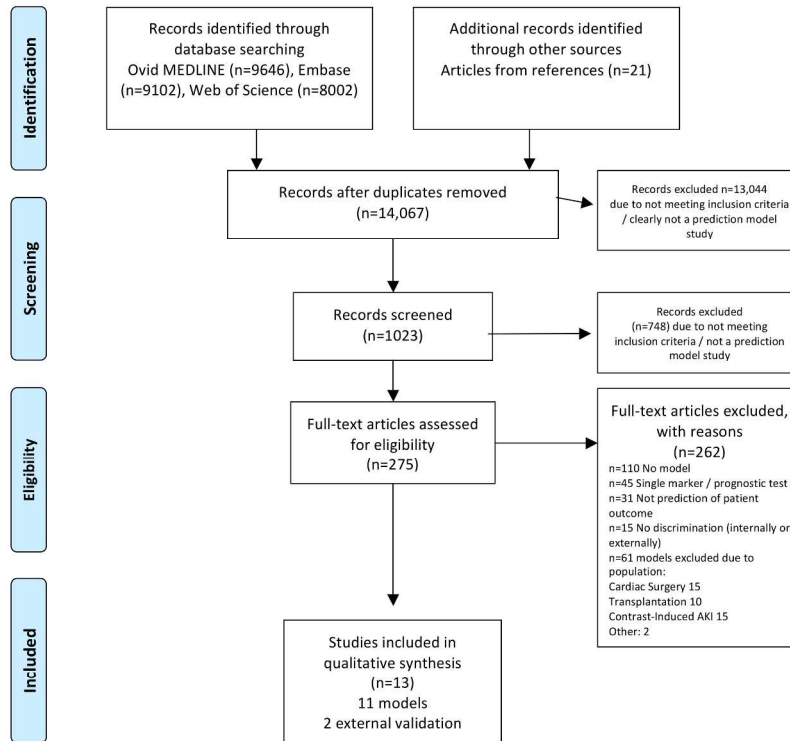

From: Moher D, Liberati A, Tetzlaff J, Altman DG, The PRISMA Group (2009). Preferred Reporting Items for Systematic Reviews and Meta-Analyses: The PRISMA Statement. PLoS Med 6(6): e1000097. doi:10.1371/journal.pmed1000097

For more information, visit [www.prisma-statement.org](http://www.prisma-statement.org).

Figure 1 - PRISMA study flow chart

215x279mm (300 x 300 DPI)

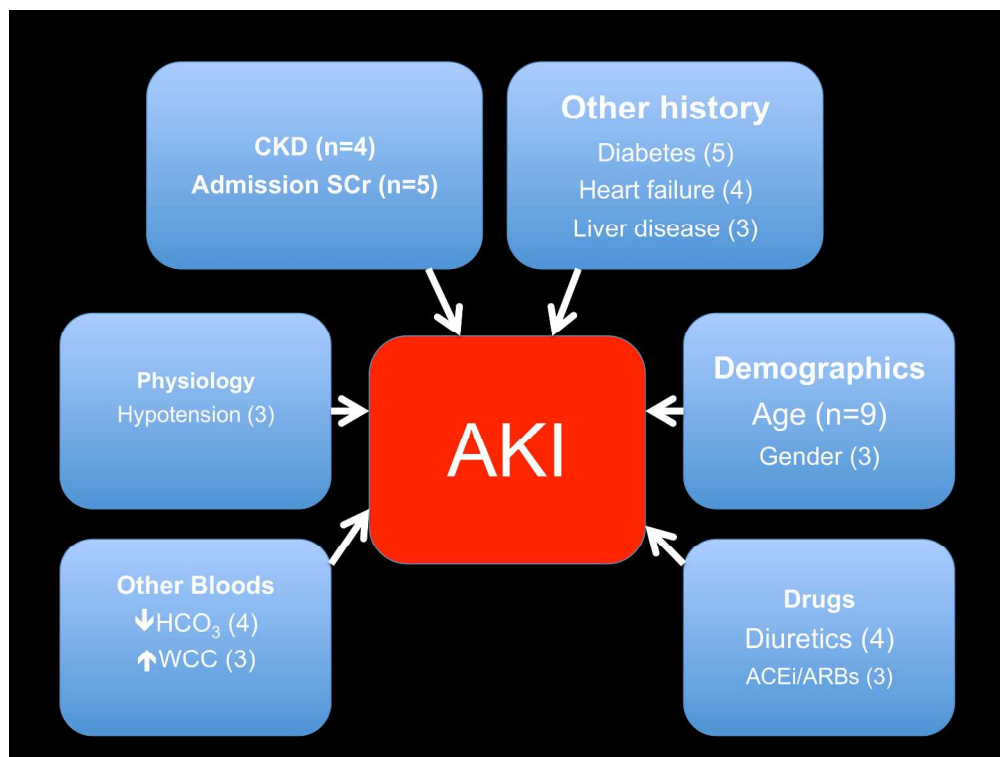

Figure 2 - Predictors most frequently included in the 11 HA-AKI prediction models. ACEi – Angiotensin-converting enzyme inhibitors, ARBs – Angiotensin-receptor blockers, Bloods – laboratory parameters, CKD – chronic kidney disease, ↓HCO<sub>3</sub> – reduced serum bicarbonate, SCr – serum creatinine, ↑WCC - raised white cell count.

254x190mm (300 x 300 DPI)

view only

**Online Supplementary file**

**eTable 1** Study inclusion criteria

**eTable 2** Embase Search

**eTable 3** Ovid MEDLINE® search

**eTable 4** - Web of Science search

**eTable 5** - CHARMS checklist and data extracted for systematic review

**eTable 6(i-iv)** – Full details of models reviewed

**eTable 7** – Abbreviations used

**eTable 8** - TRIPOD items reported in the 11 studies

**eTable 9** – Most common predictors used in the 11 models

**eTable 10** – All predictors included in the 11 models

For peer review only

1  
2  
3  
4  
5  
6  
7  
8  
9  
10  
11  
12  
13  
14  
15  
16  
17  
18  
19  
20  
21  
22  
23  
24  
25  
26  
27  
28  
29  
30  
31  
32  
33  
34  
35  
36  
37  
38  
39  
40  
41  
42  
43  
44  
45  
46  
47  
48  
49  
50  
51  
52  
53  
54  
55  
56  
57  
58  
59  
60

**eTable 1** - Study inclusion criteria.**Inclusion Criteria**

- Articles in peer-reviewed journals reporting a prognostic multivariable prediction model (scoring system or algorithm) identifying patients who developed HA-AKI (or other measures of renal dysfunction in older studies)
- Validation studies (and updating) of an existing model
- Retrospective, prospective and case-control designs
- Adults ( $\geq 18$  years) in general hospital settings
- Statistical measures of discrimination (AUROC or c-statistic)

**Exclusion Criteria**

- Patients  $< 18$  years old
- Cardiac surgery, other specialised surgery (e.g. transplantation), CI-AKI
- Non-human studies
- Case reports or conference abstracts
- Only logistic regression without a prediction model
- Lack of discrimination statistics (unless model validated elsewhere)
- Studies that investigated a single predictor, test, or marker
- Studies that investigated only causality between one or more predictors & an outcome
- Use of patients already with the outcome (e.g. AKI present at hospital admission)
- Patients in primary care
- Novel, not widely available tests, such as biomarkers

AUROC - area under the receiver-operating characteristic curve, CI-AKI – Contrast-Induced AKI, HA-AKI - hospital-acquired-AKI.



eTable 2 - Embase Search

| LINE | SEARCH TERM                                  |
|------|----------------------------------------------|
| 1    | (acute AND kidney AND injury).ti,ab          |
| 2    | AKI.ti,ab                                    |
| 3    | (acute AND renal AND failure).ti,ab          |
| 4    | ARF.ti,ab                                    |
| 5    | (contrast AND induced AND nephropathy).ti,ab |
| 6    | ACUTE KIDNEY INJURY/                         |
| 7    | OR/1-6                                       |
| 8    | predict*.ti,ab                               |
| 9    | PREDICTIVE VALUE OF TESTS/                   |
| 10   | scor*.ti,ab                                  |
| 11   | observ*.ti,ab                                |
| 12   | OBSERVER VARIATION/                          |
| 13   | 8 OR 9 OR 10 OR 11 OR 12                     |
| 14   | 7 AND 13                                     |
| 15   | (acute AND kidney AND injury).ti,ab          |
| 16   | AKI.ti,ab                                    |
| 17   | (acute AND renal AND failure).ti,ab          |
| 18   | ARF.ti,ab                                    |
| 19   | (contrast AND induced AND nephropathy).ti,ab |
| 20   | ACUTE KIDNEY FAILURE/                        |
| 21   | OR/15-20                                     |
| 22   | predict*.ti,ab                               |
| 23   | exp METHODOLOGY/                             |
| 24   | validat*.ti,ab                               |
| 25   | OR/22-24                                     |
| 26   | 21 AND 25                                    |
| 27   | 14 AND 26                                    |
|      | <b>Articles: 9102</b>                        |

**eTable 3** Ovid MEDLINE® search

| Line | Search term                                  |
|------|----------------------------------------------|
| 1    | (acute AND kidney AND injury).ti,ab          |
| 2    | AKI.ti,ab                                    |
| 3    | (acute AND renal AND failure).ti,ab          |
| 4    | ARF.ti,ab                                    |
| 5    | (contrast AND induced AND nephropathy).ti,ab |
| 6    | ACUTE KIDNEY INJURY/                         |
| 7    | OR/1-6                                       |
| 8    | predict*.ti,ab                               |
| 9    | PREDICTIVE VALUE OF TESTS/                   |
| 10   | scor*.ti,ab                                  |
| 11   | observ*.ti,ab                                |
| 12   | OBSERVER VARIATION/                          |
| 13   | OR/8-12                                      |
| 14   | 7 AND 13                                     |
|      | <b>Articles: 9646</b>                        |

eTable 4 - Web of Science search

| RESULTS | WEB OF SCIENCE SEARCH                                                                                                                                                                                                                                                                                                                                                                                                                                                                                                                                                                                                                                                                                                                                                                                                                                                            |
|---------|----------------------------------------------------------------------------------------------------------------------------------------------------------------------------------------------------------------------------------------------------------------------------------------------------------------------------------------------------------------------------------------------------------------------------------------------------------------------------------------------------------------------------------------------------------------------------------------------------------------------------------------------------------------------------------------------------------------------------------------------------------------------------------------------------------------------------------------------------------------------------------|
| 8002    | <p>(TS=((acute kidney injury) OR (aki) OR (acute renal failure) OR (arf) OR (contrast induced nephropathy)) AND TS=(predict* OR scor* OR observ* OR validat*)) AND DOCUMENT TYPES: (Article) Refined by: WEB OF SCIENCE CATEGORIES: (UROLOGY NEPHROLOGY OR SURGERY OR CARDIAC CARDIOVASCULAR SYSTEMS OR TRANSPLANTATION OR CRITICAL CARE MEDICINE OR MEDICINE GENERAL INTERNAL OR MEDICAL INFORMATICS OR GASTROENTEROLOGY HEPATOLOGY OR ANESTHESIOLOGY ) AND DOCUMENT TYPES: ( ARTICLE ) AND WEB OF SCIENCE CATEGORIES: (UROLOGY NEPHROLOGY OR SURGERY OR CARDIAC CARDIOVASCULAR SYSTEMS OR TRANSPLANTATION OR MEDICAL INFORMATICS OR CRITICAL CARE MEDICINE OR HEALTH CARE SCIENCES SERVICES OR MEDICINE GENERAL INTERNAL OR MEDICAL LABORATORY TECHNOLOGY OR GASTROENTEROLOGY HEPATOLOGY OR ANESTHESIOLOGY OR EMERGENCY MEDICINE ) Indexes=SCI-EXPANDED Timespan=All years</p> |

**eTable 5** - CHARMS checklist and data extracted for systematic review.

| Item                                         | Explanation in the Review                                                                                                                                                                                                                                                                                                                                                                                                                                                                                                                                                                                                                                                                                                                                                                                                                                                                                                                                                                                                                                                                |
|----------------------------------------------|------------------------------------------------------------------------------------------------------------------------------------------------------------------------------------------------------------------------------------------------------------------------------------------------------------------------------------------------------------------------------------------------------------------------------------------------------------------------------------------------------------------------------------------------------------------------------------------------------------------------------------------------------------------------------------------------------------------------------------------------------------------------------------------------------------------------------------------------------------------------------------------------------------------------------------------------------------------------------------------------------------------------------------------------------------------------------------------|
| <b>1. Type of studies</b>                    | Prognostic prediction models                                                                                                                                                                                                                                                                                                                                                                                                                                                                                                                                                                                                                                                                                                                                                                                                                                                                                                                                                                                                                                                             |
| <b>2. Scope</b>                              | Published prognostic prediction models for development of AKI in general hospital settings; to inform risk stratification & potential uses in decision-making in different patient groups                                                                                                                                                                                                                                                                                                                                                                                                                                                                                                                                                                                                                                                                                                                                                                                                                                                                                                |
| <b>3. Type of studies</b>                    | Model development +/- external validation in independent data; external model validation & model updating, if present                                                                                                                                                                                                                                                                                                                                                                                                                                                                                                                                                                                                                                                                                                                                                                                                                                                                                                                                                                    |
| <b>4. Target population</b>                  | Adult ( $\geq 18$ ) Patients in acute hospital environment                                                                                                                                                                                                                                                                                                                                                                                                                                                                                                                                                                                                                                                                                                                                                                                                                                                                                                                                                                                                                               |
| <b>5. Outcome predicted</b>                  | Development of AKI (or equivalent definition, including RRT) after an admission to hospital or Surgery                                                                                                                                                                                                                                                                                                                                                                                                                                                                                                                                                                                                                                                                                                                                                                                                                                                                                                                                                                                   |
| <b>6. Time span of prediction</b>            | In-hospital development of the outcome                                                                                                                                                                                                                                                                                                                                                                                                                                                                                                                                                                                                                                                                                                                                                                                                                                                                                                                                                                                                                                                   |
| <b>7. Intended moment of using the model</b> | Pre-operatively to predict the risk of post-op AKI or need for RRT; at admission to risk stratify or guide therapy                                                                                                                                                                                                                                                                                                                                                                                                                                                                                                                                                                                                                                                                                                                                                                                                                                                                                                                                                                       |
| Summary of Data extracted                    |                                                                                                                                                                                                                                                                                                                                                                                                                                                                                                                                                                                                                                                                                                                                                                                                                                                                                                                                                                                                                                                                                          |
|                                              | <ul style="list-style-type: none"> <li>• Data source (years, retrospective, prospective; cohort, case-control, trial data)</li> <li>• Participants &amp; setting (eg cardiac surgery, single or multi-centre, country)</li> <li>• Primary outcome (and any blinding)</li> <li>• Candidate predictors (definitions; continuous data dichotomised? &amp; how selected for modelling)</li> <li>• Sample size, EPV (including all predictors considered)</li> <li>• Type of model(s) evaluated - derivation, validation (internal, external)</li> <li>• Missing data, number included &amp; excluded (criteria)</li> <li>• Type of model (eg full model approach), shrinkage</li> <li>• Incidence of outcome &amp; mortality data</li> <li>• Predictors in the model(s)</li> <li>• Performance: discrimination (AUC or C-Statistic) &amp; calibration (eg H-L P value, slope/curve), risk groups</li> <li>• Internal &amp; external validation (in same study)</li> <li>• External validation studies with relevant performance measures</li> <li>• Additional resources, funding</li> </ul> |

AKI – acute kidney injury, EPV – events per variable, H-L – Hosmer-Lemeshow goodness-of-fit test, RRT – renal replacement therapy.

1  
2  
3  
4  
5  
6  
7  
8  
9  
10  
11  
12  
13  
14  
15  
16  
17  
18  
19  
20  
21  
22  
23  
24  
25  
26  
27  
28  
29  
30  
31  
32  
33  
34  
35  
36  
37  
38  
39  
40  
41  
42  
43  
44  
45  
46  
47

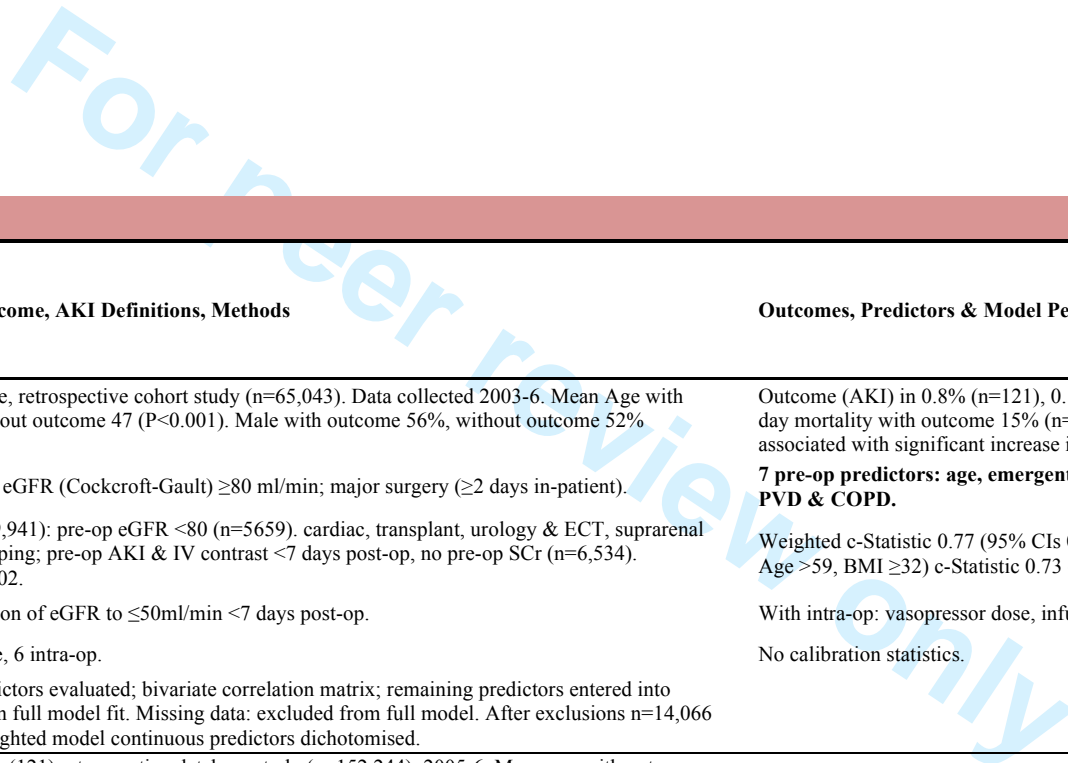

**eTable 6(i) Surgery**

| Author, Type, TRIPOD detail                                                                                                           | Population, Outcome, AKI Definitions, Methods                                                                                                                                                                                                                                                                                                                                                                                                                                                                                                                                                                                                                                                                                                                                                                                                                                                                                                                                                                                                                                                                                                    | Outcomes, Predictors & Model Performance                                                                                                                                                                                                                                                                                                                                                                                                                                                                                                                                                                                        | External Validation         |
|---------------------------------------------------------------------------------------------------------------------------------------|--------------------------------------------------------------------------------------------------------------------------------------------------------------------------------------------------------------------------------------------------------------------------------------------------------------------------------------------------------------------------------------------------------------------------------------------------------------------------------------------------------------------------------------------------------------------------------------------------------------------------------------------------------------------------------------------------------------------------------------------------------------------------------------------------------------------------------------------------------------------------------------------------------------------------------------------------------------------------------------------------------------------------------------------------------------------------------------------------------------------------------------------------|---------------------------------------------------------------------------------------------------------------------------------------------------------------------------------------------------------------------------------------------------------------------------------------------------------------------------------------------------------------------------------------------------------------------------------------------------------------------------------------------------------------------------------------------------------------------------------------------------------------------------------|-----------------------------|
| <p><b>Kheterpal 2007</b></p> <p><b>General surgery</b></p> <p><b>TRIPOD 1A - Derivation</b></p> <p><b>(25/37 pts)</b></p>             | <p>USA single centre, retrospective cohort study (n=65,043). Data collected 2003-6. Mean Age with outcome 59, without outcome 47 (P&lt;0.001). Male with outcome 56%, without outcome 52% (P=0.32).</p> <p>Inclusion: pre-op eGFR (Cockcroft-Gault) ≥80 ml/min; major surgery (≥2 days in-patient).</p> <p>Exclusions (n=49,941): pre-op eGFR &lt;80 (n=5659), cardiac, transplant, urology &amp; ECT, suprarenal aortic cross-clamping; pre-op AKI &amp; IV contrast &lt;7 days post-op, no pre-op SCr (n=6,534). Included: n=15,102.</p> <p>Outcome: reduction of eGFR to ≤50ml/min &lt;7 days post-op.</p> <p>Predictors: 24 pre, 6 intra-op.</p> <p>Collinearity predictors evaluated; bivariate correlation matrix; remaining predictors entered into logistic regression full model fit. Missing data: excluded from full model. After exclusions n=14,066 included. Un-weighted model continuous predictors dichotomised.</p>                                                                                                                                                                                                             | <p>Outcome (AKI) in 0.8% (n=121), 0.1% (n=14) required RRT. Propensity matched 30-day mortality with outcome 15% (n=17/118) vs. 2.7% (n=9/352) without. AKI associated with significant increase in 30-day, 60-day, 1-yr mortality.</p> <p><b>7 pre-op predictors: age, emergent surgery, liver disease, BMI, high-risk surgery, PVD &amp; COPD.</b></p> <p>Weighted c-Statistic 0.77 (95% CIs 0.75-0.79). Un-weighted risk factor scale (cut-off Age &gt;59, BMI ≥32) c-Statistic 0.73 (0.7-0.76).</p> <p>With intra-op: vasopressor dose, infusion &amp; diuretic: AUC 0.79 (0.77-0.81)</p> <p>No calibration statistics.</p> | <p>Xing 2012 - AUC 0.66</p> |
| <p><b>Kheterpal 2009</b></p> <p><b>General surgery</b></p> <p><b>TRIPOD 2A - Derivation, Validation</b></p> <p><b>(28/37 pts)</b></p> | <p>USA multi-centre (121) retrospective database study (n=152,244). 2005-6. Mean age with outcome 64.8 (±14.8), without 53.5 (±17.3) (P&lt;0.001). Male with outcome 57%, without outcome 39% (P&lt;0.001).</p> <p>Included n=75,952. Random split derivation 75% (n=57,080) &amp; validation (25% n= 18,872).</p> <p>Exclusions (n=76,292): vascular, cardiac, urology, ophthalmology, obstetric, or urologic procedures; day case; pre-op AKI (rapidly increasing azotaemia &amp; SCr ≥265 µmol/L &lt;24h of surgery) or previous RRT (n=1637).</p> <p>Admission SCr taken as baseline, assessed as predictor &amp; included in the model.</p> <p>‘Mild’ pre-op renal insufficiency defined SCr 106-168 µmol/L; ‘moderate’ &gt;177 µmol/L.</p> <p>Outcome: AKI defined as increase SCr ≥177 µmol/L (from pre-op value) or RRT &lt;30 days.</p> <p>Missing data: SPSS assessed impact of imputation. Continuous predictors dichotomised. Collinearity &amp; Pearson correlations evaluated for all 19 preoperative predictors (comorbidities, drugs, type of surgery). Remaining predictors entered into multivariable logistic regression.</p> | <p>Outcome in 1% (n=762/75,952) – n=561 derivation, n=201 in validation sets.</p> <p>Mortality 42% (n=320) in those with outcome vs 8% in a propensity matched group without outcome.</p> <p><b>9 predictors (simplified risk index): age ≥56 yr, male, emergency, intraperitoneal surgery, diabetes, CCF, ascites, HTN, mild or moderate pre-op renal insufficiency.</b></p> <p>c-Statistic 0.80 (0.79-0.81) in derivation &amp; internal validation cohorts.</p> <p>Calibration: Risk classes reported for derivation vs validation sets.</p>                                                                                 | <p>-</p>                    |

eTable 6(ii)  
Trauma &  
Orthopaedics

| Author, Type, TRIPOD detail                                                                                        | Population, Outcome, AKI Definitions, Methods                                                                                                                                                                                                                                                                                                                                                                                                                                                                                                                                                                                                                                                                                                                                                                                                                                                                                                                                                                                                                                                                                                                                                    | Outcomes, Predictors & Model Performance                                                                                                                                                                                                                                                                                                                                                                                                                                                                                                                                                                                                                                                   | External Validation                       |
|--------------------------------------------------------------------------------------------------------------------|--------------------------------------------------------------------------------------------------------------------------------------------------------------------------------------------------------------------------------------------------------------------------------------------------------------------------------------------------------------------------------------------------------------------------------------------------------------------------------------------------------------------------------------------------------------------------------------------------------------------------------------------------------------------------------------------------------------------------------------------------------------------------------------------------------------------------------------------------------------------------------------------------------------------------------------------------------------------------------------------------------------------------------------------------------------------------------------------------------------------------------------------------------------------------------------------------|--------------------------------------------------------------------------------------------------------------------------------------------------------------------------------------------------------------------------------------------------------------------------------------------------------------------------------------------------------------------------------------------------------------------------------------------------------------------------------------------------------------------------------------------------------------------------------------------------------------------------------------------------------------------------------------------|-------------------------------------------|
| <p><b>Bell 2015</b></p> <p><b>T&amp;O</b></p> <p><b>TRIPOD 3,4 – Derivation, Internal &amp; EV (34/37 pts)</b></p> | <p>UK multi-centre (3) retrospective cohort study linking multiple prospectively collected databases (n=15,218). 2005-11. Overall mean age 70.7 (<math>\pm 15.3</math>), with outcome 76.5 (<math>\pm 11.1</math>) without outcome 70.0 (<math>\pm 15.6</math>). Overall Male 37%, with outcome 47%, without 36%.</p> <p>Included: derivation n=6,220 (2 sites) &amp; validation n=4,395 (1 site).</p> <p>Exclusions: missing SCr (n=2,688), RRT, 2<sup>nd</sup> operation (n=1,915).</p> <p>Outcome: KDIOGO SCr changes &lt;7 days. CKD defined using eGFR from CKD-EPI. Admission SCr taken as baseline if elective admission.</p> <p>Entered 11 candidate predictors (age, sex, CKD (baseline eGFR), diabetes, number drugs, ACEi/ARB, NSAID/COX-2, statin, urgency, ASA grade &amp; deprivation category into Backward/forward multivariable selection. Applied a conservative selection criterion of P&lt;0.15 to limit over-fitting risk.</p> <p>Bootstrapping for IV. To assess robustness sensitivity analyses performed: multiple imputation relaxing &amp; restricting the backward selection removal criterion &amp; adding non-linear &amp; interaction terms. Categorized eGFR.</p> | <p>Outcome (AKI) in 10.8% (n=672) derivation &amp; 6.7% (n=295) validation sets. With AKI adjusted hazard ratio 1.53 (95% CI 1.38-1.70).</p> <p><b>7 predictors: age, male, diabetes, number drugs, CKD (eGFR), ACEi/ARBs &amp; ASA.</b></p> <p>Risk calculator supplied.</p> <p>Derivation AUC 0.74 (0.72-0.76), Internal validation 0.73.</p> <p>EV 0.70. Risk groups shown.</p> <p>Calibration plot. Calibration suboptimal in validation cohort (over-predicted risk).</p> <p>Re-calibration: correction factor, added to intercept; intercept and regression coefficient index as the only predictor used to transform prognostic index &amp; compute recalibrated probabilities.</p> | <p>Same Study different site AUC 0.70</p> |

eTable 6(iii)  
General admissions

| Author, Type, TRIPOD detail                                                                                                                | Population, Outcome, AKI Definitions, Methods                                                                                                                                                                                                                                                                                                                                                                                                                                                                                                                                                                                                                                                                                                                                                                                                                                                                                                                                                                                                                                                                                                                                                                                                                                                                                                                                                                                                                                                                             | Outcomes, Predictors & Model Performance                                                                                                                                                                                                                                                                                                                                                                                                                                                                                                                                                                                                                                                                                                                                                  | External Validation |
|--------------------------------------------------------------------------------------------------------------------------------------------|---------------------------------------------------------------------------------------------------------------------------------------------------------------------------------------------------------------------------------------------------------------------------------------------------------------------------------------------------------------------------------------------------------------------------------------------------------------------------------------------------------------------------------------------------------------------------------------------------------------------------------------------------------------------------------------------------------------------------------------------------------------------------------------------------------------------------------------------------------------------------------------------------------------------------------------------------------------------------------------------------------------------------------------------------------------------------------------------------------------------------------------------------------------------------------------------------------------------------------------------------------------------------------------------------------------------------------------------------------------------------------------------------------------------------------------------------------------------------------------------------------------------------|-------------------------------------------------------------------------------------------------------------------------------------------------------------------------------------------------------------------------------------------------------------------------------------------------------------------------------------------------------------------------------------------------------------------------------------------------------------------------------------------------------------------------------------------------------------------------------------------------------------------------------------------------------------------------------------------------------------------------------------------------------------------------------------------|---------------------|
| <p><b>Drawz 2008</b></p> <p><b>Medicine, surgery, obstetrics</b></p> <p><b>TRIPOD 2A – Derivation, Internal Validation (26/37 pts)</b></p> | <p>USA multi-centre (3), retrospective, case-controlled study (n=180 cases, n=360 controls). 2003. Mean age with outcome 67, controls 63 (P=0.01). Males with outcome 74%, controls 80% (P=0.18). Hospital-acquired AKI (HA-AKI) defined: increase SCr <math>\geq 44\mu\text{mol/L}</math> if baseline SCr <math>\leq 168\mu\text{mol/L}</math>, <math>\geq 88\mu\text{mol/L}</math> baseline 177-433<math>\mu\text{mol/L}</math> &amp; <math>\geq 133\mu\text{mol/L}</math> baseline <math>&gt;442\mu\text{mol/L}</math>. Admission SCr presumed to be baseline. Random split derivation (2/3) &amp; internal validation.</p> <p>‘Control’ cases – mix of same discharge diagnosis or next patient admitted to clinical team.</p> <p>Inclusions: age <math>\geq 18</math> &amp; normal admission SCr or admission SCr not qualifying as AKI vs known baseline.</p> <p>Exclusions: RRT, no repeat SCr performed. 19 predictors assessed: demographics (age, sex, race), medical history, medications &amp; admission observations &amp; blood parameters (BP, HR, HCO<sub>3</sub>, urea, SCr, &amp; albumin). Predictors with p value <math>&lt;0.20</math> univariate analysis entered into multiple logistic regression model. Final model chosen by maximizing likelihood ratio, c-statistic &amp; R<sup>2</sup> while minimizing AIC. Also produced a simplified model, created by categorizing continuous variables into quartiles.</p> <p>Cases with missing data excluded. Multiple imputation also performed.</p> | <p>No information on mortality.</p> <p><b>7 predictors: age, SBP, HR, HCO<sub>3</sub>, urea, albumin &amp; drugs (NSAIDs, ACE-I, ARBs or diuretic).</b></p> <p>Derivation c-statistic 0.73. Simplified: HR <math>\geq 70/\text{min}</math>, HCO<sub>3</sub> (<math>&lt;24</math> or <math>&gt;30\text{mmol/L}</math>), SCr <math>\geq 88\mu\text{mol/L}</math> &amp; drugs. Internal validation 0.66.</p> <p>Simplified model HR <math>\geq 70</math>, HCO<sub>3</sub> (<math>&lt;24</math> or <math>&gt;30\text{mmol/L}</math>), SCr <math>\geq 88\mu\text{mol/L}</math> &amp; NSAIDs/ACEi/ARBs/Diuretics - C-statistic derivation 0.69, internal validation 0.66. No H-L p-value. Risk range in validation set plotted: 0/1 risk factor = 16% risk HA-AKI, vs 4 risk factors = 62%.</p> |                     |
| <p><b>Matheny 2010</b></p> <p><b>General admissions</b></p> <p><b>TRIPOD 1B – Derivation (28/37 pts)</b></p>                               | <p>USA single centre, retrospective cohort study (n=61,179). 1999-2003. No data on mean age (25.6% age <math>&gt;65</math>). Overall males 44.4%.</p> <p>Inclusions: adult admissions <math>\geq 2</math> days (n=26,107).</p> <p>Exclusions: missing data, those with a baseline eGFR <math>&lt;60</math> (n=11,342), AKI on admission, no SCr available within 48 hrs of admission (n=10,378) or no repeat SCr (n=13,352).</p> <p>Outcome (<math>&lt;30</math> days post admission): AKI Risk = <math>\geq 2</math> SCr results <math>\geq 150\%</math> of baseline. AKI Injury = <math>\geq 200\%</math> baseline. eGFR using MDRD equation.</p> <p>27 predictors assessed: coded diagnoses (including admission diagnosis), blood parameters (including admission SCr) &amp; drugs following univariate analysis placed in multivariable model. Missing values captured as a separate category.</p> <p>10-fold cross-validation employed to estimate overfitting.</p>                                                                                                                                                                                                                                                                                                                                                                                                                                                                                                                                                 | <p>AKI Risk 5.2% (n=1,352), AKI Injury 2.8% (n=726).</p> <p>No mortality data.</p> <p><b>27 predictors: Female, Age, Race, 11 classes of drugs, Contrast, bacterial infection (use of antibiotics), admission SCr, MI, rhabdomyolysis, hepatitis, pancreatitis, ammonia, AST/ALT ratio, thrombocytopenia, leucocytosis, hypercalcaemia, glucose.</b></p> <p>AKI Risk: AUC 0.75 (0.73–0.76). H-L P = 0.29. AKI Injury: AUC 0.78 (0.76–0.79), H-L P=0.12.</p> <p>Calibration plotted by deciles.</p>                                                                                                                                                                                                                                                                                        |                     |

| eTable 6(iii)<br>General admissions                                                                              |                                                                                                                                                                                                                                                                                                                                                                                                                                                                                                                                                                                                                                                                                                                                                                                                                                                                                                                                                                                                                                                                                                                                                                        |                                                                                                                                                                                                                                                                                                                                                                                                                                                                                                                                                                                                                        |                                                                                |
|------------------------------------------------------------------------------------------------------------------|------------------------------------------------------------------------------------------------------------------------------------------------------------------------------------------------------------------------------------------------------------------------------------------------------------------------------------------------------------------------------------------------------------------------------------------------------------------------------------------------------------------------------------------------------------------------------------------------------------------------------------------------------------------------------------------------------------------------------------------------------------------------------------------------------------------------------------------------------------------------------------------------------------------------------------------------------------------------------------------------------------------------------------------------------------------------------------------------------------------------------------------------------------------------|------------------------------------------------------------------------------------------------------------------------------------------------------------------------------------------------------------------------------------------------------------------------------------------------------------------------------------------------------------------------------------------------------------------------------------------------------------------------------------------------------------------------------------------------------------------------------------------------------------------------|--------------------------------------------------------------------------------|
| Author, Type, TRIPOD detail                                                                                      | Population, Outcome, AKI Definitions, Methods                                                                                                                                                                                                                                                                                                                                                                                                                                                                                                                                                                                                                                                                                                                                                                                                                                                                                                                                                                                                                                                                                                                          | Outcomes, Predictors & Model Performance                                                                                                                                                                                                                                                                                                                                                                                                                                                                                                                                                                               | External Validation                                                            |
| <p><b>Forni 2013</b></p> <p><b>General medical TRIPOD 2B, 4 – Derivation, Internal &amp; EV (29/37 pts)</b></p>  | <p>UK single centre. Prospective cohort study (n=3,707). 2012. Median (IQR) age with outcome 80 (70-86), without outcome 73 (61-81) (P&lt;0.001). Males with outcome 51% without outcome 49% (P=0.834).</p> <p>Inclusion: medical patients staying &gt;1 night in hospital (n=1,867).</p> <p>Exclusions: RRT, non-medical patients, age &lt;18, AKI on admission (n=184), missing data (n=553). Included n=3,523. Derivation n=1,867.</p> <p>Outcome: AKI (KDIGO SCr change &lt;7 days). CKD defined – eGFR &lt;60 on Pre-admission SCr measured &gt;1 month &amp; &lt;6 months.</p> <p>Internal validation: patients with no previous SCr result, but with a SCr on admission within normal range (defined 80-120µmol/L) (n=1,656).</p> <p>25 predictors on univariate, If P &lt;0.05 variable entered into multivariable analysis. No missing data information.</p>                                                                                                                                                                                                                                                                                                  | <p>Derivation group developed AKI 7% (n=95) – mortality 20% vs 3.5% (n=62) without outcome.</p> <p>In validation cohort n=60 developed AKI.</p> <p><b>7 predictors: Age 60-79 (1 point) ≥80 (3 pts), CCF, CKD, Diabetes (2 pts), Liver disease (3 pts), respiratory rate ≥20/min, &lt;alert on AVPU score (3 pts).</b></p> <p>Derivation AUC 0.72 (0.66–0.77). H-L P=0.96. Risks plotted.</p> <p>Validation AUC 0.76 (0.71–0.82). No H-L reported.</p>                                                                                                                                                                 | <p>Hodgson 2017, AUC 0.65-0.71</p>                                             |
| <p><b>Bedford 2016</b></p> <p><b>General admissions TRIPOD 2A, 3 – Derivation, EV (29/37 pts)</b></p>            | <p>UK multi-centre (3), 2011. Retrospective cohort study (n=11,655). Average age and sex not given.</p> <p>Included: derivation n=7,556 admissions &amp; internal validation n=2,514.</p> <p>Exclusions: non-emergency, pre-admission AKI, AKI at admission, obstetrics, patients with no info on AKI at 72 hours.</p> <p>Outcomes: AKI &amp; AKI Stage 2/3. AKI &lt;72 hours, using KDIGO change in SCr.</p> <p>Ordinal logistic regression with univariable analysis for development of multivariable analysis.</p> <p>45 Predictors included demographics, bloods, prior admissions, co-morbidity. Backwards selection used for retention of statistically significant predictors. Missing data excluded or given own category.</p> <p>3:1 random split for internal validation. External validation n=1,585, single centre.</p>                                                                                                                                                                                                                                                                                                                                    | <p>Derivation AKI 9.6% (n=241), AKI 2/3: n=40. No mortality data. EV AKI 7.6% (n=120), AKI 2/3 n=12.</p> <p><b>12 predictors: age, primary diagnosis, previous hospital admissions, Charlson co-morbidity index score, HbA1C, troponin, proteinuria, baseline eGFR, K<sup>+</sup>, WCC, Mg<sup>2+</sup>, CRP.</b></p> <p>IV AUC 0.67 (0.64-0.71) any AKI, 0.68 for AKI 2/3. No derivation AUC</p> <p>H-L P=0.04 any AKI model, P=0.005 for AKI 2/3.</p>                                                                                                                                                                | <p>Same study AUC 0.71 (0.63 AKI 2/3). H-L P=0.12 AKI, P=0.14 for AKI 2/3.</p> |
| <p><b>Koyner 2016</b></p> <p><b>General admissions TRIPOD 2A Derivation, Internal Validation (24/37 pts)</b></p> | <p>USA multi-centre (5) Retrospective cohort study (n=269,999). 2008-2013. Mean age with outcome 70 (±16), without outcome 63 (±19) (P&lt;0.001). Males with outcome 49%, without outcome 43% (P&lt;0.001).</p> <p>Included: n=202,961.</p> <p>Exclusions: SCr &gt;354 µmol/L on admission (n=11,305), those without SCr measurement (n=52,508) &amp; AKI prior to arrival on ward (n=3,225). Admission SCr defined as baseline, assessed as predictor &amp; included in model. Outcome: rise SCr as per KDIGO but within 24hrs period.</p> <p>Model included 29 predictors. Continuous predictors modelled using restricted cubic splines with knot placement. Variable importance plot created. Laboratory values &amp; vital signs updated periodically therefore separated into time intervals &amp; logistic regression used for model estimation. Values closest to beginning of that time variable used to predict outcome for that interval, if no values available during an interval, most recent value used, if no previous value available, median value across entire cohort imputed. Split derivation (60%) &amp; internal validation (40%) by time.</p> | <p>AKI 8.6% (n=17,541). Mortality with outcome 6% (n=1031) vs 1% (n=1,419) without</p> <p><b>29 predictors: SCr, Urea, HR, anion gap, Urea/SCr, RR, glucose, WCC, K<sup>+</sup>, Oxygen Saturations, age, HCO<sub>3</sub>, Na<sup>+</sup>, temperature, prior ICU, albumin, bilirubin, Ca<sup>2+</sup>, platelets, time, SBP/ DBP, pulse pressure, sex, AVPU, Alkaline phosphatase, Hb, total protein, AST.</b></p> <p>Discrimination reported for validation cohort only: AKI AUC 0.74 (0.74-0.74), AKI Stage 3 AUC 0.83 (0.83-0.84)</p> <p>Model including only SCr, BUN &amp; their ratio AUC 0.69 (0.68-0.69).</p> | <p>-</p>                                                                       |



eTable 6(iv)  
Heart failure

| Author, Type, TRIPOD detail                                                                                   | Population, Outcome, AKI Definitions, Methods                                                                                                                                                                                                                                                                                                                                                                                                                                                                                                                                                                                                                                                                                                                                                                                                                                                                                                                                               | Outcomes, Predictors & Model Performance                                                                                                                                                                                                                                                                                                                                                                                                                                                         | External Validation                                   |
|---------------------------------------------------------------------------------------------------------------|---------------------------------------------------------------------------------------------------------------------------------------------------------------------------------------------------------------------------------------------------------------------------------------------------------------------------------------------------------------------------------------------------------------------------------------------------------------------------------------------------------------------------------------------------------------------------------------------------------------------------------------------------------------------------------------------------------------------------------------------------------------------------------------------------------------------------------------------------------------------------------------------------------------------------------------------------------------------------------------------|--------------------------------------------------------------------------------------------------------------------------------------------------------------------------------------------------------------------------------------------------------------------------------------------------------------------------------------------------------------------------------------------------------------------------------------------------------------------------------------------------|-------------------------------------------------------|
| <p><b>Forman 2004</b></p> <p><b>TRIPOD 1B - Derivation, Internal Validation</b></p> <p><b>(26/37 pts)</b></p> | <p>USA multi-centre (11) retrospective cohort study (n=1,009). 1997-8. Overall mean age 67 (±15), with outcome 68.7, without outcome 66.8 (P=0.07). Overall males 51.2%, 52% with outcome 50.9% without outcome.</p> <p>Exclusion (number not given): elective, &lt;2 days, severe aortic stenosis, anticipated transplant, RRT, LVAD, high output failure, age &lt;20, chemotherapy. Excluded n=5 with missing charts. Included n=1004.</p> <p>Outcome: worsening renal function (WRF) - rise SCr &gt;26.5µmol/l during admission.</p> <p>29 predictors assessed: demographics, history, drugs, symptoms, signs. Unclear method for excluding patients who had AKI at admission. Used admission SCr as baseline &amp; as a predictor.</p> <p>Multivariable Cox regression models, stepwise selection. Bootstrapping for IV. Missing data: predictors missing &gt;15% excluded; categorical data assumed "not present" &amp; separate dummy indicator used if &gt;5% of values missing.</p> | <p>'WRF' 27% (271/1,004).</p> <p>Mortality: risk ratio 7.5 with outcome (number not reported).</p> <p><b>4 predictors: CCF, diabetes &amp; BP &gt;160 mmHg (1 point), SCr 132.6-212µmol/l (2 points) &amp; SCr &gt;221µmol/l (3 points).</b></p> <p>Risk 'WRF': 0 pts = 10%, 1 = 19%, 2 = 20%, 3 = 30%, 4+ = 53%. 22% of total sample with risk score ≥4 had 53% likelihood WRF vs 10% risk among 12% with risk score 0 points (p&lt;0.001).</p> <p><b>No AUC or Calibration statistics.</b></p> | <p>Breidhardt 2011 - 0.65</p> <p>Wang 2013 - 0.65</p> |
| <p><b>Breidhardt 2011</b></p> <p><b>TRIPOD 1A – Derivation, (EV Forman)</b></p> <p><b>(23/37 pts)</b></p>     | <p>Swiss multi-centre (3) prospective analysis, with derivation (Basel score) &amp; external validation of Forman score (n=767). 2001-2, 2006-2010. Overall median age 79 (71-85), with outcome 79 (72-85), without outcome 79 (70-85) (P=0.36). Overall males 55%, with outcome 61%, without outcome 54% (P=0.08).</p> <p>Included n=657.</p> <p>Exclusions (n=110): stay &lt;2 days, incomplete SCr.</p> <p>Outcome: WRF = in-hospital increase SCr ≥26.5µmol/L.</p> <p>CKD from eGFR (using MDRD equation) &lt;60 for &gt;3/12 pre-admission. eGFR at admission to hospital included as a predictor. Unclear method for excluding patients who had AKI at admission.</p> <p>48 predictors assessed on univariate &amp; those with P value &lt;0.05 entered into multivariable analysis. No missing data information. n=223 had blood gas analysis.</p>                                                                                                                                   | <p>Outcome 21% (136/657).</p> <p>In-hospital mortality with outcome 17% (n=23) vs 6% (n=33) without (P &lt;0.01).</p> <p><b>3 predictors (n=223): HCO<sub>3</sub> &lt;21 mmol/L, Diuretics, CKD - AUC 0.71 (0.63-0.79).</b></p> <p>A computer-based, complex, exponential risk model AUC 0.75 (0.67-0.82).</p> <p>No H-L calibration data.</p> <p>Scores &amp; percentage developing outcome: 0 - 1%, 1 - 35%, 2 - 27%, 3 - 35%.</p>                                                             | <p>-</p>                                              |

eTable 6(iv)  
Heart failure

| Author, Type, TRIPOD detail                                                                                          | Population, Outcome, AKI Definitions, Methods                                                                                                                                                                                                                                                                                                                                                                                                                                                                                                                                                                                                                                                                                                                                                                                                                                                                                                                                                                           | Outcomes, Predictors & Model Performance                                                                                                                                                                                                                                                                                                                                                                                                                                                                                                                                                                                                                                                                                                                        | External Validation |
|----------------------------------------------------------------------------------------------------------------------|-------------------------------------------------------------------------------------------------------------------------------------------------------------------------------------------------------------------------------------------------------------------------------------------------------------------------------------------------------------------------------------------------------------------------------------------------------------------------------------------------------------------------------------------------------------------------------------------------------------------------------------------------------------------------------------------------------------------------------------------------------------------------------------------------------------------------------------------------------------------------------------------------------------------------------------------------------------------------------------------------------------------------|-----------------------------------------------------------------------------------------------------------------------------------------------------------------------------------------------------------------------------------------------------------------------------------------------------------------------------------------------------------------------------------------------------------------------------------------------------------------------------------------------------------------------------------------------------------------------------------------------------------------------------------------------------------------------------------------------------------------------------------------------------------------|---------------------|
| <p><b>Wang 2013</b></p> <p><b>TRIPOD 2A – Derivation, External validation (Forman)</b></p> <p><b>(30/37 pts)</b></p> | <p>China, single centre, retrospective cohort study (n=1,709). 2004-11. Median age with outcome 73 (67-78), without outcome 71 (63-75) (P&lt;0.001). Males 56.6% with outcome, 55% without outcome (P=0.13).</p> <p>Inclusion: CCF admission diagnosed by 2 cardiologists using European Society of Cardiology guidelines.</p> <p>Exclusions: age &lt;18, stay &lt;2 days, missing data, hospital transfer, use LVAD, ESRD or RRT &amp; septic or haemorrhagic shock; cardiac op, pacemaker or cardioversion &amp; contrast.</p> <p>Split derivation (60%, n=1010) &amp; validation (40%, n=699).</p> <p>Outcome: AKI (AKIN): increase SCr <math>\geq 26.4 \mu\text{mol/L}</math> or <math>\geq 50\%</math> in &lt;48 hrs. eGFR – MDRD – unclear whether admission SCr was used to estimate baseline eGFR or how patients with AKI at admission were excluded. Admission SCr used as a predictor.</p> <p>35 predictors – those with P value &lt;0.1 on univariate analysis placed in multivariate analysis (n=932).</p> | <p>Overall AKI 32% (n=550). Mortality 16.5% (n=91) vs. 1.9% (n=22) without AKI (P &lt;0.01). Stay with AKI 14 vs. 11 days without (P &lt;0.01).</p> <p><b>8 predictors: Age <math>\geq 70</math>; <math>\geq 3</math> CCF admissions, systolic BP &lt;90mmHg, Na<sup>+</sup> &lt;130mmol/L, NYHA IV, proteinuria, SCr <math>\geq 104 \mu\text{mol/L}</math> &amp; furosemide dose <math>\geq 80</math> mg/day.</b></p> <p>Derivation AUC 0.76 (0.73–0.79) H-L P=0.98. Calibration plots by deciles. Validation 0.76 (0.72-0.8), H-L P=0.13.</p> <p><math>\geq 8</math> points high risk - 55.1% incidence vs. 18% if &lt;8 points No calibration slope.</p> <p>Forman - 0.65 (0.62–0.69). vs Forman score, improvement of 0.11 AUC, (P &lt;0.001(DeLong)(9)</p> |                     |

eTable 7 – Abbreviations used in eTable 6(i-iv)

|                                                                                                                |
|----------------------------------------------------------------------------------------------------------------|
| ACEi – Angiotensin-converting enzyme inhibitors                                                                |
| AKI – Acute kidney injury                                                                                      |
| AKIN – Acute kidney injury network                                                                             |
| ALT – Alanine aminotransferase                                                                                 |
| ARB – Angiotensin receptor blockers                                                                            |
| ASA – American Society of Anesthesiologists Physical status grading used in pre-operative assessment           |
| AST – Aspartate transaminase                                                                                   |
| AVPU – scale of consciousness best response: Alert, responds to Voice, Pain, Unresponsive.                     |
| AUC/AUROC – Area under the receiver operating characteristic curve                                             |
| BMI – Body mass index                                                                                          |
| BP – Blood pressure                                                                                            |
| CA-AKI – Community-acquired AKI                                                                                |
| Ca <sup>2+</sup> - Serum Calcium                                                                               |
| CI-AKI – Iodinated contrast AKI                                                                                |
| CKD – Chronic kidney disease                                                                                   |
| COPD - Chronic obstructive pulmonary disease                                                                   |
| CCF – Congestive cardiac failure                                                                               |
| CKD-EPI – CKD Epidemiology collaborative equation                                                              |
| COX – Cyclo-oxygenase                                                                                          |
| CRP – C-reactive protein                                                                                       |
| D – Derivation study                                                                                           |
| DBP – Diastolic Blood Pressure                                                                                 |
| eGFR – estimated glomerular filtration rate                                                                    |
| ESRD – end-stage renal disease                                                                                 |
| EV – External validation study                                                                                 |
| HA-AKI – Hospital-acquired AKI                                                                                 |
| Hb - Haemoglobin                                                                                               |
| HbA1C – glycated haemoglobin (A1c) Marker of long-term glucose control                                         |
| HCO <sub>3</sub> – serum Sodium Bicarbonate                                                                    |
| H-L – Hosmer-Lemeshow goodness-of-fit test (Calibration statistic)                                             |
| HR – Heart rate (beats per minute)                                                                             |
| HTN – Hypertension                                                                                             |
| ICU – Intensive Care Unit                                                                                      |
| IHD – Ischaemic heart disease                                                                                  |
| IV – Internal Validation study                                                                                 |
| K <sup>+</sup> - Serum Potassium                                                                               |
| KDIGO – Kidney disease improving global outcomes (Stage 1-3 AKI defined by magnitude of SCr rise or fall in ur |
| LOS – length of stay                                                                                           |
| LVAD – Left ventricular assist device                                                                          |
| LVEF – Left ventricular ejection fraction                                                                      |
| MAP – Mean arterial pressure                                                                                   |
| MDRD – Modification of diet in renal disease equation                                                          |
| Mg <sup>2+</sup> - serum Magnesium                                                                             |
| MI – Myocardial infarction                                                                                     |
| Na <sup>+</sup> – Serum sodium                                                                                 |
| NSAID – Non-steroidal anti-inflammatory agent                                                                  |

|    |                                                                                                                                                                                                |
|----|------------------------------------------------------------------------------------------------------------------------------------------------------------------------------------------------|
| 1  |                                                                                                                                                                                                |
| 2  |                                                                                                                                                                                                |
| 3  |                                                                                                                                                                                                |
| 4  | NYHA – New York Heart Association Classification for heart failure (I-IV)                                                                                                                      |
| 5  | PVD – Peripheral vascular disease                                                                                                                                                              |
| 6  | RIFLE – Risk, Injury, failure, loss of kidney function                                                                                                                                         |
| 7  | RR – respiratory rate (breaths per minute)                                                                                                                                                     |
| 8  | RRT – Renal replacement therapy                                                                                                                                                                |
| 9  |                                                                                                                                                                                                |
| 10 | SCr – serum creatinine                                                                                                                                                                         |
| 11 | Systolic Blood Pressure                                                                                                                                                                        |
| 12 | TRIPOD – Transparent Reporting of a multivariable prediction model for Individual Prognosis or Diagnosis.<br>Checklist in derivation (37 points – 1 point for each recommended item reported). |
| 13 |                                                                                                                                                                                                |
| 14 | <b>TRIPOD Study types</b>                                                                                                                                                                      |
| 15 | Type 1a: Development only                                                                                                                                                                      |
| 16 | Type 1b: Development and validation using resampling                                                                                                                                           |
| 17 | Type 2a: Random split-sample development and validation,                                                                                                                                       |
| 18 | Type 2b: Non-random split-sample development and validation                                                                                                                                    |
| 19 | Type 3: Development and validation using separate data                                                                                                                                         |
| 20 | Type 4: Validation only.                                                                                                                                                                       |
| 21 | WCC – White cell count                                                                                                                                                                         |
| 22 | WRF – ‘worsening renal failure’ (defined by individual study)                                                                                                                                  |
| 23 |                                                                                                                                                                                                |
| 24 |                                                                                                                                                                                                |
| 25 |                                                                                                                                                                                                |
| 26 |                                                                                                                                                                                                |
| 27 |                                                                                                                                                                                                |
| 28 |                                                                                                                                                                                                |
| 29 |                                                                                                                                                                                                |
| 30 |                                                                                                                                                                                                |
| 31 |                                                                                                                                                                                                |
| 32 |                                                                                                                                                                                                |
| 33 |                                                                                                                                                                                                |
| 34 |                                                                                                                                                                                                |
| 35 |                                                                                                                                                                                                |
| 36 |                                                                                                                                                                                                |
| 37 |                                                                                                                                                                                                |
| 38 |                                                                                                                                                                                                |
| 39 |                                                                                                                                                                                                |
| 40 |                                                                                                                                                                                                |
| 41 |                                                                                                                                                                                                |
| 42 |                                                                                                                                                                                                |
| 43 |                                                                                                                                                                                                |
| 44 |                                                                                                                                                                                                |
| 45 |                                                                                                                                                                                                |
| 46 |                                                                                                                                                                                                |
| 47 |                                                                                                                                                                                                |
| 48 |                                                                                                                                                                                                |
| 49 |                                                                                                                                                                                                |
| 50 |                                                                                                                                                                                                |
| 51 |                                                                                                                                                                                                |
| 52 |                                                                                                                                                                                                |
| 53 |                                                                                                                                                                                                |
| 54 |                                                                                                                                                                                                |
| 55 |                                                                                                                                                                                                |
| 56 |                                                                                                                                                                                                |
| 57 |                                                                                                                                                                                                |
| 58 |                                                                                                                                                                                                |
| 59 |                                                                                                                                                                                                |
| 60 |                                                                                                                                                                                                |

eTable 8 - TRIPOD items reported in the 11 studies.

| Title & Abstract             | TRIPOD Item description                                                                                                                                                                          | Reported ? |
|------------------------------|--------------------------------------------------------------------------------------------------------------------------------------------------------------------------------------------------|------------|
| Title                        | 1 Identify study as developing &/or validating a multivariable prediction model, target population & outcome.                                                                                    | 10         |
| Abstract                     | 2 Provide a summary of objectives, study design, setting, participants, sample size, predictors, outcome, statistical analysis, results & conclusions.                                           | 9          |
| <b>Introduction</b>          |                                                                                                                                                                                                  |            |
| Background & objectives      | 3a Explain medical context (including whether diagnostic or prognostic) & rationale for developing or validating the multivariable prediction model, including references to existing models.    | 11         |
|                              | 3b Specify objectives, including whether the study describes development or validation of the model or both.                                                                                     | 11         |
| <b>Methods</b>               |                                                                                                                                                                                                  |            |
| Source of data               | 4a Describe study design or source of data (e.g., randomized trial, cohort, or registry data), separately for the development & validation data sets, if applicable.                             | 11         |
|                              | 4b Specify key study dates, including start of accrual; end of accrual; & if applicable, end of follow-up.                                                                                       | 11         |
| Participants                 | 5a Specify key elements of the study setting (e.g., primary care, secondary care, general population) including number & location of centres.                                                    | 11         |
|                              | 5b Describe eligibility criteria for participants.                                                                                                                                               | 11         |
|                              | 5c Give details of treatments received, if relevant.                                                                                                                                             | 9          |
| Outcome                      | 6a Clearly define outcome predicted by the prediction model, including how & when assessed.                                                                                                      | 11         |
|                              | 6b Report any actions to blind assessment of the outcome to be predicted.                                                                                                                        | 0          |
| Predictors                   | 7a Clearly define all predictors used in developing or validating the model, including how & when they were measured.                                                                            | 11         |
|                              | 7b Report any actions to blind assessment of predictors for the outcome and other predictors.                                                                                                    | 0          |
| Sample size                  | 8 Explain how the study size was arrived at.                                                                                                                                                     | 2          |
| Missing data                 | 9 Describe how missing data were handled (e.g., complete-case analysis, single imputation, multiple imputation) with details of any imputation method.                                           | 7          |
| Statistical analysis methods | 10a Describe how predictors were handled in the analyses.                                                                                                                                        | 11         |
|                              | 10b Specify type of model, model-building procedures (including predictor selection) & method for internal validation.                                                                           | 11         |
|                              | 10c For validation, describe how the predictions were calculated.                                                                                                                                | 6          |
|                              | 10d Specify all measures used to assess model performance & if relevant, to compare multiple models.                                                                                             | 8          |
|                              | 10e Describe any model updating (e.g., recalibration) arising from the validation, if done.                                                                                                      | 1          |
| Risk groups                  | 11 Provide details on how risk groups were created, if done.                                                                                                                                     | 10         |
| Development vs. validation   | 12 For validation, identify differences from development data in setting, eligibility criteria, outcome & predictors.                                                                            | 4          |
| <b>Results</b>               |                                                                                                                                                                                                  |            |
| Participants                 | 13a Describe flow of participants through the study, including number of participants with & without the outcome & if applicable, a summary of the follow-up time. A diagram may be helpful.     | 11         |
|                              | 13b Describe characteristics of the participants (basic demographics, clinical features, available predictors), including the number of participants with missing data for predictors & outcome. | 9          |
|                              | 13c For validation, show a comparison with the development data of the distribution of important variables (demographics, predictors and outcome).                                               | 3          |
| Model development            | 14a Specify the number of participants & outcome events in each analysis.                                                                                                                        | 11         |
|                              | 14b If done, report the unadjusted association between each candidate predictor & outcome.                                                                                                       | 11         |
| Model specification          | 15a Present the full prediction model to allow predictions for individuals (i.e., all regression coefficients & model intercept or baseline survival at a given time point).                     | 8          |
|                              | 15b Explain how to use the prediction model.                                                                                                                                                     | 11         |
| Model performance            | 16 Report performance measures (with CIs) for the prediction model.                                                                                                                              | 8          |
| Model-updating               | 17 If done, report the results from any model updating (i.e., model specification, model performance).                                                                                           | 1          |
| <b>Discussion</b>            |                                                                                                                                                                                                  |            |
| Limitations                  | 18 Discuss any limitations of the study (non-representative sample, few events per predictor, missing data).                                                                                     | 11         |
| Interpretation               | 19a For validation, discuss results with reference to performance in development data & any other validation data.                                                                               | 8          |
|                              | 19b Give overall interpretation of results, considering objectives, limitations, results from similar studies & other relevant evidence.                                                         | 11         |
| Implications                 | 20 Discuss potential clinical use of the model & implications for future research.                                                                                                               | 11         |
| <b>Other information</b>     |                                                                                                                                                                                                  |            |
| Suppl info                   | 21 Provide information about availability of supplementary resources, (study protocol, Web calculator, & data sets).                                                                             | 3          |
| Funding                      | 22 Give the source of funding & role of the funders for the present study.                                                                                                                       | 9          |

1  
2  
3 Red colouring highlights items reported in less than 50% of the 11 AKI prediction model studies.  
4  
5  
6  
7  
8  
9  
10  
11  
12  
13  
14  
15  
16  
17  
18  
19  
20  
21  
22  
23  
24  
25  
26  
27  
28  
29  
30  
31  
32  
33  
34  
35  
36  
37  
38  
39  
40  
41  
42  
43  
44  
45  
46  
47  
48  
49  
50  
51  
52  
53  
54  
55  
56  
57  
58  
59  
60

For peer review only

eTable 9 – Most common predictors included in the 11 models

| Field                 | Total | General Surgery   |                   | T&O          | General       |                 |                |                 |               | Heart Failure  |                    |              |
|-----------------------|-------|-------------------|-------------------|--------------|---------------|-----------------|----------------|-----------------|---------------|----------------|--------------------|--------------|
|                       |       | Kheterpal<br>2007 | Kheterpal<br>2009 | Bell<br>2015 | Drawz<br>2008 | Matheny<br>2010 | Koyner<br>2016 | Bedford<br>2016 | Forni<br>2013 | Forman<br>2004 | Breidhardt<br>2011 | Wang<br>2013 |
| <b>Demographics</b>   |       |                   |                   |              |               |                 |                |                 |               |                |                    |              |
| Age                   | 9     | X                 | x                 | x            | x             | x               | x              | x               | x             |                |                    | x            |
| Male/gender           | 3     |                   | x                 | x            |               |                 |                |                 |               |                |                    |              |
| <b>Past history</b>   |       |                   |                   |              |               |                 |                |                 |               |                |                    |              |
| Diabetes              | 5     |                   | x                 | x            |               |                 |                | x               | x             | x              |                    |              |
| CKD                   | 4     |                   |                   | x            |               |                 |                | x               | x             |                | x                  |              |
| Heart failure         | 4     |                   | x                 |              |               |                 |                |                 | x             | x              |                    | x            |
| Liver disease         | 3     | X                 |                   |              |               | x               |                |                 | x             |                |                    |              |
| <b>Drugs</b>          |       |                   |                   |              |               |                 |                |                 |               |                |                    |              |
| Diuretics             | 4     |                   |                   |              | x             | x               |                |                 |               |                | x                  | x            |
| ACEi/ARBs             | 3     |                   |                   | x            | x             | x               |                |                 |               |                |                    |              |
| <b>Observations</b>   |       |                   |                   |              |               |                 |                |                 |               |                |                    |              |
| Hypotension/<br>Shock | 3     |                   |                   |              | x             |                 | x              |                 |               |                |                    | x            |
| <b>Blloods</b>        |       |                   |                   |              |               |                 |                |                 |               |                |                    |              |
| SCr                   | 5     |                   | x                 |              |               | x               | x              |                 |               | x              |                    | x            |
| Bicarbonate           | 4     |                   |                   |              | x             | x               | x              |                 |               |                | x                  |              |
| ↑WCC                  | 3     |                   |                   |              |               | x               | x              | x               |               |                |                    |              |

ACEi – angiotensin-converting enzyme inhibitor drugs, ARB – Angiotensin 2 receptor blocker drugs, CKD = chronic kidney disease, Bloods – laboratory parameters, SCr – serum creatinine, T&O – Trauma and Orthopaedics, WCC – white cell count.

eTable 10 – All predictors included in the 11 models

| Field                       | General Surgery   |                   | T&O          | General       |                 |                |                 |               | Heart Failure  |                    |              | Total |
|-----------------------------|-------------------|-------------------|--------------|---------------|-----------------|----------------|-----------------|---------------|----------------|--------------------|--------------|-------|
| Study                       | Kheterpal<br>2007 | Kheterpal<br>2009 | Bell<br>2015 | Drawz<br>2008 | Matheny<br>2010 | Koyner<br>2016 | Bedford<br>2016 | Forni<br>2013 | Forman<br>2004 | Breidhardt<br>2011 | Wang<br>2013 |       |
| <b>Demographics</b>         |                   |                   |              |               |                 |                |                 |               |                |                    |              |       |
| Age                         | x                 | x                 | x            | x             | x               | x              | x               | x             |                |                    | x            | 9     |
| Male/gender                 |                   | x                 | x            |               |                 | x              |                 |               |                |                    |              | 3     |
| BMI                         | x                 |                   |              |               |                 |                |                 |               |                |                    |              | 1     |
| Race                        |                   |                   |              |               | x               |                |                 |               |                |                    |              | 1     |
| <b>Past history</b>         |                   |                   |              |               |                 |                |                 |               |                |                    |              |       |
| Diabetes                    |                   | x                 | x            |               |                 |                | x               | x             | x              |                    |              | 5     |
| CKD                         |                   |                   | x            |               |                 |                | x               | x             |                | x                  |              | 4     |
| Heart failure               |                   | x                 |              |               |                 |                |                 | x             | x              |                    | x            | 4     |
| Liver disease               | x                 |                   |              |               | x               |                |                 | x             |                |                    |              | 3     |
| Hypertension                |                   | x                 |              |               |                 |                |                 |               |                |                    |              | 1     |
| PVD                         | x                 |                   |              |               |                 |                |                 |               |                |                    |              | 1     |
| Ascites                     |                   | x                 |              |               |                 |                |                 |               |                |                    |              | 1     |
| COPD                        | x                 |                   |              |               |                 |                |                 |               |                |                    |              | 1     |
| Previous admissions         |                   |                   |              |               |                 | x<br>(ICU)     | x               |               |                |                    |              | 2     |
| Charlson co-morbidity index |                   |                   |              |               |                 |                | x               |               |                |                    |              | 1     |
| ASA Grade                   |                   |                   | x            |               |                 |                |                 |               |                |                    |              | 1     |



| Field                            | General Surgery   |                   | T&O          | General       |                 |                |                 |               | Heart Failure  |                     |              | Total |
|----------------------------------|-------------------|-------------------|--------------|---------------|-----------------|----------------|-----------------|---------------|----------------|---------------------|--------------|-------|
| Study                            | Kheterpal<br>2007 | Kheterpal<br>2009 | Bell<br>2015 | Drawz<br>2008 | Matheny<br>2010 | Koyner<br>2016 | Bedford<br>2016 | Forni<br>2013 | Forman<br>2004 | Breidthardt<br>2011 | Wang<br>2013 |       |
| <b>Drugs</b>                     |                   |                   |              |               |                 |                |                 |               |                |                     |              |       |
| Diuretics                        |                   |                   |              | x             | x               |                |                 |               |                | x                   | x            | 4     |
| ACEi/ARBs                        |                   |                   | x            | x             | x               |                |                 |               |                |                     |              | 3     |
| NSAIDs                           |                   |                   |              | x             | x               |                |                 |               |                |                     |              | 2     |
| Contrast                         |                   |                   |              |               | x               |                |                 |               |                |                     |              | 1     |
| Number of<br>drugs               |                   |                   | x            |               |                 |                |                 |               |                |                     |              | 1     |
| Other drugs <sup>1</sup>         |                   |                   |              |               | x               |                |                 |               |                |                     |              | 1     |
| <b>Observations</b>              |                   |                   |              |               |                 |                |                 |               |                |                     |              |       |
| Hypotension /<br>Shock           |                   |                   |              | x             |                 | x              |                 |               |                |                     | x            | 3     |
| Pulse pressure                   |                   |                   |              |               |                 | x              |                 |               |                |                     |              | 1     |
| Hypertension                     |                   |                   |              | x             |                 |                |                 |               | x              |                     |              | 2     |
| Heart rate <sup>2</sup>          |                   |                   |              | x             |                 | x              |                 |               |                |                     |              | 2     |
| Temperature                      |                   |                   |              |               |                 | x              |                 |               |                |                     |              | 1     |
| Respiratory<br>rate <sup>3</sup> |                   |                   |              |               |                 | x              |                 | x             |                |                     |              | 2     |
| O2 saturations                   |                   |                   |              |               |                 | x              |                 |               |                |                     |              | 1     |
| Consciousness <sup>4</sup>       |                   |                   |              |               |                 | x              |                 | x             |                |                     |              | 2     |
| <b>Surgery,<br/>Other</b>        |                   |                   |              |               |                 |                |                 |               |                |                     |              |       |
| Type of<br>surgery               | x                 | x                 |              |               |                 |                |                 |               |                |                     |              | 2     |
| Emergency                        | x                 | x                 |              |               |                 |                |                 |               |                |                     |              | 2     |
| Time                             |                   |                   |              |               |                 | x              |                 |               |                |                     |              | 1     |

| Field<br>Study                        | General Surgery   |                   | T&O          | General       |                 |                |                 |               | Heart Failure  |                    |              | Total |
|---------------------------------------|-------------------|-------------------|--------------|---------------|-----------------|----------------|-----------------|---------------|----------------|--------------------|--------------|-------|
|                                       | Kheterpal<br>2007 | Kheterpal<br>2009 | Bell<br>2015 | Drawz<br>2008 | Matheny<br>2010 | Koyner<br>2016 | Bedford<br>2016 | Forni<br>2013 | Forman<br>2004 | Breidhardt<br>2011 | Wang<br>2013 |       |
| <b>Labs, Diagnosis</b>                |                   |                   |              |               |                 |                |                 |               |                |                    |              |       |
| Primary diagnosis                     |                   |                   |              |               |                 |                | X               |               |                |                    |              | 1     |
| SCr                                   |                   | X                 |              |               | X               | X              |                 |               | X              |                    | X            | 5     |
| Haemoglobin                           |                   |                   |              |               |                 | X              |                 |               |                |                    |              | 1     |
| ↓Platelets <sup>5</sup>               |                   |                   |              |               | X               | X              |                 |               |                |                    |              | 2     |
| CRP                                   |                   |                   |              |               |                 |                | X               |               |                |                    |              | 1     |
| ↑WCC                                  |                   |                   |              |               | X               | X              | X               |               |                |                    |              | 3     |
| Bacterial infection <sup>6</sup>      |                   |                   |              |               | X               |                |                 |               |                |                    |              | 1     |
| MI <sup>7</sup>                       |                   |                   |              |               | X               |                | X               |               |                |                    |              | 2     |
| Rhabdomyolysis <sup>8</sup>           |                   |                   |              |               | X               |                |                 |               |                |                    |              | 2     |
| Hepatitis/AST <sup>9</sup>            |                   |                   |              |               | X               | X              |                 |               |                |                    |              | 2     |
| Alk Phosphatase                       |                   |                   |              |               |                 | X              |                 |               |                |                    |              | 1     |
| Bilirubin                             |                   |                   |              |               |                 | X              |                 |               |                |                    |              | 1     |
| Pancreatitis <sup>10</sup>            |                   |                   |              |               | X               |                |                 |               |                |                    |              | 1     |
| Bicarbonate                           |                   |                   |              | X             | X               | X              |                 |               |                | X                  |              | 4     |
| Anion gap                             |                   |                   |              |               |                 | X              |                 |               |                |                    |              | 1     |
| BUN/Cr                                |                   |                   |              |               |                 | X              |                 |               |                |                    |              | 1     |
| Urea                                  |                   |                   |              | X             |                 | X              |                 |               |                |                    |              | 2     |
| ↑Ca <sup>2+</sup> /Ca <sup>2+11</sup> |                   |                   |              |               | X               | X              |                 |               |                |                    |              | 2     |
| ↑glucose                              |                   |                   |              |               | X               | X              |                 |               |                |                    |              | 2     |
| Magnesium                             |                   |                   |              |               |                 |                | X               |               |                |                    |              | 1     |
| Potassium                             |                   |                   |              |               |                 | X              | X               |               |                |                    |              | 2     |
| ↓Na <sup>+</sup> /Na <sup>+12</sup>   |                   |                   |              |               |                 | X              |                 |               |                | X                  |              | 2     |
| Albumin                               |                   |                   |              | X             |                 | X              |                 |               |                |                    |              | 2     |
| Total protein                         |                   |                   |              |               |                 | X              |                 |               |                |                    |              | 1     |
| Proteinuria                           |                   |                   |              |               |                 |                | X               |               |                |                    | X            | 2     |

1  
2  
3  
4  
5  
6  
7  
8  
9  
10  
11  
12  
13  
14  
15  
16  
17  
18  
19  
20  
21  
22  
23  
24  
25  
26  
27  
28  
29  
30  
31  
32  
33  
34  
35  
36  
37  
38  
39  
40  
41  
42  
43  
44  
45  
46  
47

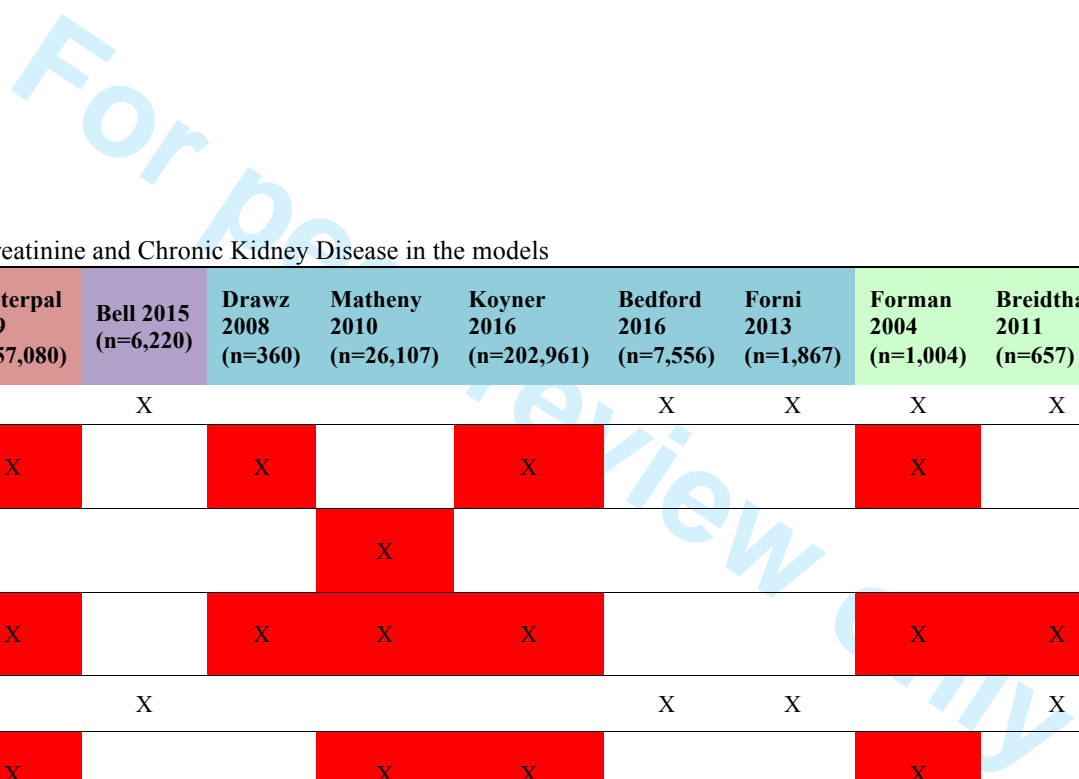

eTable 11 – Handling of Serum Creatinine and Chronic Kidney Disease in the models

| Author, year (n=derivation cases)   | Kheterpal 2007 (n=14,066) | Kheterpal 2009 (n=57,080) | Bell 2015 (n=6,220) | Drawz 2008 (n=360) | Matheny 2010 (n=26,107) | Koyner 2016 (n=202,961) | Bedford 2016 (n=7,556) | Forni 2013 (n=1,867) | Forman 2004 (n=1,004) | Breidhardt 2011 (n=657) | Wang 2013 (n=1,010) |
|-------------------------------------|---------------------------|---------------------------|---------------------|--------------------|-------------------------|-------------------------|------------------------|----------------------|-----------------------|-------------------------|---------------------|
| CKD defined                         |                           |                           | X                   |                    |                         |                         | X                      | X                    | X                     | X                       | X                   |
| Admission SCr used as baseline      |                           | X                         |                     | X                  |                         | X                       |                        |                      | X                     |                         | X                   |
| Omitted cases with reduced GFR      | X                         |                           |                     |                    | X                       |                         |                        |                      |                       |                         |                     |
| Admission SCr assessed as predictor |                           | X                         |                     | X                  | X                       | X                       |                        |                      | X                     | X                       | X                   |
| CKD included in model               |                           |                           | X                   |                    |                         |                         | X                      | X                    |                       | X                       |                     |
| Admission SCr included in model     |                           | X                         |                     |                    | X                       | X                       |                        |                      | X                     |                         | X                   |

CKD - Chronic Kidney Disease, SCr - Serum Creatinine. Red shading indicates concern over handling of SCr in the study.

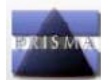

# PRISMA 2009 Checklist

| Section/topic                      | #  | Checklist item                                                                                                                                                                                                                                                                                              | Reported on page #                 |
|------------------------------------|----|-------------------------------------------------------------------------------------------------------------------------------------------------------------------------------------------------------------------------------------------------------------------------------------------------------------|------------------------------------|
| <b>TITLE</b>                       |    |                                                                                                                                                                                                                                                                                                             |                                    |
| Title                              | 1  | Identify the report as a systematic review, meta-analysis, or both.                                                                                                                                                                                                                                         | Title page                         |
| <b>ABSTRACT</b>                    |    |                                                                                                                                                                                                                                                                                                             |                                    |
| Structured summary                 | 2  | Provide a structured summary including, as applicable: background; objectives; data sources; study eligibility criteria, participants, and interventions; study appraisal and synthesis methods; results; limitations; conclusions and implications of key findings; systematic review registration number. | Page 2-3                           |
| <b>INTRODUCTION</b>                |    |                                                                                                                                                                                                                                                                                                             |                                    |
| Rationale                          | 3  | Describe the rationale for the review in the context of what is already known.                                                                                                                                                                                                                              | 5-6                                |
| Objectives                         | 4  | Provide an explicit statement of questions being addressed with reference to participants, interventions, comparisons, outcomes, and study design (PICOS).                                                                                                                                                  | 7-8                                |
| <b>METHODS</b>                     |    |                                                                                                                                                                                                                                                                                                             |                                    |
| Protocol and registration          | 5  | Indicate if a review protocol exists, if and where it can be accessed (e.g., Web address), and, if available, provide registration information including registration number.                                                                                                                               | NA                                 |
| Eligibility criteria               | 6  | Specify study characteristics (e.g., PICOS, length of follow-up) and report characteristics (e.g., years considered, language, publication status) used as criteria for eligibility, giving rationale.                                                                                                      | 8, online supplementary eTable 1   |
| Information sources                | 7  | Describe all information sources (e.g., databases with dates of coverage, contact with study authors to identify additional studies) in the search and date last searched.                                                                                                                                  | 7                                  |
| Search                             | 8  | Present full electronic search strategy for at least one database, including any limits used, such that it could be repeated.                                                                                                                                                                               | online supplementary eTable 2-4    |
| Study selection                    | 9  | State the process for selecting studies (i.e., screening, eligibility, included in systematic review, and, if applicable, included in the meta-analysis).                                                                                                                                                   | 7-8                                |
| Data collection process            | 10 | Describe method of data extraction from reports (e.g., piloted forms, independently, in duplicate) and any processes for obtaining and confirming data from investigators.                                                                                                                                  | 8-9, online supplementary eTable 5 |
| Data items                         | 11 | List and define all variables for which data were sought (e.g., PICOS, funding sources) and any assumptions and simplifications made.                                                                                                                                                                       | 8-9 online supplementary eTable 6  |
| Risk of bias in individual studies | 12 | Describe methods used for assessing risk of bias of individual studies (including specification of whether this was done at the study or outcome level), and how this information is to be used in any data synthesis.                                                                                      | 9                                  |
| Summary measures                   | 13 | State the principal summary measures (e.g., risk ratio, difference in means).                                                                                                                                                                                                                               | NA                                 |

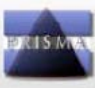

# PRISMA 2009 Checklist

1  
2  
3  
4  
5  
6  
7  
8  
9  
10  
11  
12  
13  
14  
15  
16  
17  
18  
19  
20  
21  
22  
23  
24  
25  
26  
27  
28  
29  
30  
31  
32  
33  
34  
35  
36  
37  
38  
39  
40  
41  
42  
43  
44  
45  
46  
47  
48  
49

|                      |    |                                                                                                                                                           |     |
|----------------------|----|-----------------------------------------------------------------------------------------------------------------------------------------------------------|-----|
| Synthesis of results | 14 | Describe the methods of handling data and combining results of studies, if done, including measures of consistency (e.g., $I^2$ ) for each meta-analysis. | N/A |
|----------------------|----|-----------------------------------------------------------------------------------------------------------------------------------------------------------|-----|

Page 1 of 2

| Section/topic | # | Checklist item | Reported on page # |
|---------------|---|----------------|--------------------|
|---------------|---|----------------|--------------------|

|                             |    |                                                                                                                                                  |                                   |
|-----------------------------|----|--------------------------------------------------------------------------------------------------------------------------------------------------|-----------------------------------|
| Risk of bias across studies | 15 | Specify any assessment of risk of bias that may affect the cumulative evidence (e.g., publication bias, selective reporting within studies).     | online supplementary eTables 6, 8 |
| Additional analyses         | 16 | Describe methods of additional analyses (e.g., sensitivity or subgroup analyses, meta-regression), if done, indicating which were pre-specified. | NA                                |

## RESULTS

|                               |    |                                                                                                                                                                                                          |                            |
|-------------------------------|----|----------------------------------------------------------------------------------------------------------------------------------------------------------------------------------------------------------|----------------------------|
| Study selection               | 17 | Give numbers of studies screened, assessed for eligibility, and included in the review, with reasons for exclusions at each stage, ideally with a flow diagram.                                          | 10, Figure 1,              |
| Study characteristics         | 18 | For each study, present characteristics for which data were extracted (e.g., study size, PICOS, follow-up period) and provide the citations.                                                             | supplementary eTables 6    |
| Risk of bias within studies   | 19 | Present data on risk of bias of each study and, if available, any outcome level assessment (see item 12).                                                                                                | supplementary eTables 6, 8 |
| Results of individual studies | 20 | For all outcomes considered (benefits or harms), present, for each study: (a) simple summary data for each intervention group (b) effect estimates and confidence intervals, ideally with a forest plot. | supplementary eTable 6     |
| Synthesis of results          | 21 | Present results of each meta-analysis done, including confidence intervals and measures of consistency.                                                                                                  | NA                         |
| Risk of bias across studies   | 22 | Present results of any assessment of risk of bias across studies (see Item 15).                                                                                                                          | NA                         |
| Additional analysis           | 23 | Give results of additional analyses, if done (e.g., sensitivity or subgroup analyses, meta-regression [see Item 16]).                                                                                    | NA                         |

## DISCUSSION

|                     |    |                                                                                                                                                                                      |                                  |
|---------------------|----|--------------------------------------------------------------------------------------------------------------------------------------------------------------------------------------|----------------------------------|
| Summary of evidence | 24 | Summarize the main findings including the strength of evidence for each main outcome; consider their relevance to key groups (e.g., healthcare providers, users, and policy makers). | 13-15                            |
| Limitations         | 25 | Discuss limitations at study and outcome level (e.g., risk of bias), and at review-level (e.g., incomplete retrieval of identified research, reporting bias).                        | supplementary eTable 6, 8, pg.14 |
| Conclusions         | 26 | Provide a general interpretation of the results in the context of other evidence, and implications for future research.                                                              | 15-18                            |

## FUNDING

|         |    |                                                                                                                                            |    |
|---------|----|--------------------------------------------------------------------------------------------------------------------------------------------|----|
| Funding | 27 | Describe sources of funding for the systematic review and other support (e.g., supply of data); role of funders for the systematic review. | NA |
|---------|----|--------------------------------------------------------------------------------------------------------------------------------------------|----|

From: Moher D, Liberati A, Tetzlaff J, Altman DG, The PRISMA Group (2009). Preferred Reporting Items for Systematic Reviews and Meta-Analyses: The PRISMA Statement. PLoS Med 6(6): e1000097. doi:10.1371/journal.pmed1000097 For more information, visit: [www.prisma-statement.org](http://www.prisma-statement.org) Page 2 of 2
